# Supplementary material for: Rhodium-catalyzed denitrogenative gem-difunctionalization of pyridotriazoles with thioesters: formal carbene insertion into C(O)–S bonds
Source: Royal Society of Chemistry journal article supplement (doi:10.1039/d1cc06041d), 2021-12-18
Supplement: d1cc06041d1.pdf [file d1cc06041d1.pdf]

## Supporting Information

# Rhodium-Catalyzed Denitrogenative *gem*-Difunctionalization of Pyridotriazoles with Thioesters: Formal Carbene Insertion into C(O)–S Bonds

Zhe Gao,<sup>1</sup> Di Jiang,<sup>1</sup> Bin Li,<sup>\*,1</sup> and Baiquan Wang<sup>1,2</sup>

*\*E-mail: nklibin@nankai.edu.cn*

<sup>1</sup>State Key Laboratory of Elemento-Organic Chemistry, College of Chemistry, Nankai University,  
Tianjin 300071, China

<sup>2</sup>State Key Laboratory of Organometallic Chemistry, Shanghai Institute of Organic Chemistry,  
Chinese Academy of Sciences, Shanghai 200032, China

## Table of Contents

---

|                                                                 |         |
|-----------------------------------------------------------------|---------|
| I. Table of Contents                                            | S1      |
| II. General Experimental Section                                | S2      |
| III. Single crystal X-ray structure of complexes 3aa and 3zb    | S3      |
| IV. Table S1. Crystal Data and Summary of X-ray Data Collection | S5      |
| V. Preparation and Characterization of Products 3               | S6-S23  |
| VI. Scale up preparation of 3aa                                 | S24     |
| VII. Intermolecular competition reaction                        | S25-S27 |
| VIII. Oxidation reaction of 3aa                                 | S28     |
| IX. Asymmetric synthesis                                        | S29-S30 |
| X. NMR Spectra of Products                                      | S31-S82 |
| XI. References                                                  | S83     |

---

## General Experimental Section

**Analytic methods.** All the reactions were carried out under argon atmosphere using standard Schlenk technique.  $^1\text{H}$  NMR (400 MHz),  $^{19}\text{F}$  (376 MHz) and  $^{13}\text{C}\{^1\text{H}\}$  NMR (100 MHz) were recorded on a Bruker AV400 NMR spectrometer. Chemical shifts of  $^1\text{H}$ ,  $^{19}\text{F}$ , and  $^{13}\text{C}\{^1\text{H}\}$  NMR spectra are reported in parts per million (ppm), and the residual solvent peak was used as an internal reference: proton ( $\text{CDCl}_3$ :  $\delta = 7.26$  ppm,  $\text{DMSO-}d_6$ :  $\delta = 2.50$ ), carbon ( $\text{CDCl}_3$ :  $\delta = 77.00$ ,  $\text{DMSO-}d_6$ :  $\delta = 39.50$ ). All coupling constants ( $J$  values) were reported in Hertz (Hz). Multiplicities are reported as follows: singlet (s), doublet (d), doublet of doublets (dd), doublet of doublet of doublets (ddd), doublet of triplets (dt), triplet (t), triplet of doublets (td), quartet (q), and multiplet (m). Column chromatography was performed on silica gel 200-300 mesh. Analytical thin-layer chromatography (TLC) was performed on pre-coated, glass-backed silica gel plates. Visualization of the developed chromatogram was performed by UV absorbance (254 nm). HRMS were done on Agilent 6520 Q-TOF LC/MS or Varian 7.0T FTMS.

**General preparation for chemicals.** Unless otherwise noted, all reagents were obtained from commercial suppliers and used without further purification. The substrates pyridotriazoles (**1**)<sup>[1]</sup> and thioesters (**2**)<sup>[2]</sup> were prepared according to the literature procedures.

**X-ray Crystallographic Analysis.** All intensity data were collected with a Bruker SMART CCD diffractometer equipped with graphite mono-chromated Mo-K $\alpha$  radiation ( $\lambda = 0.71073 \text{ \AA}$ ). The structures were solved by direct methods and refined by full-matrix least squares on  $F^2$ .<sup>[3]</sup> All non-hydrogen atoms were refined anisotropically. Hydrogen atoms were considered in calculated positions. Single crystals of complexes **3aa** and **3zb** suitable for X-ray diffraction were obtained from hexane/CH<sub>2</sub>Cl<sub>2</sub> solution. The crystal data and summary of X-ray data collection are presented in Tables S1.

### Single crystal X-ray structure of complex **3aa** and **3zb**

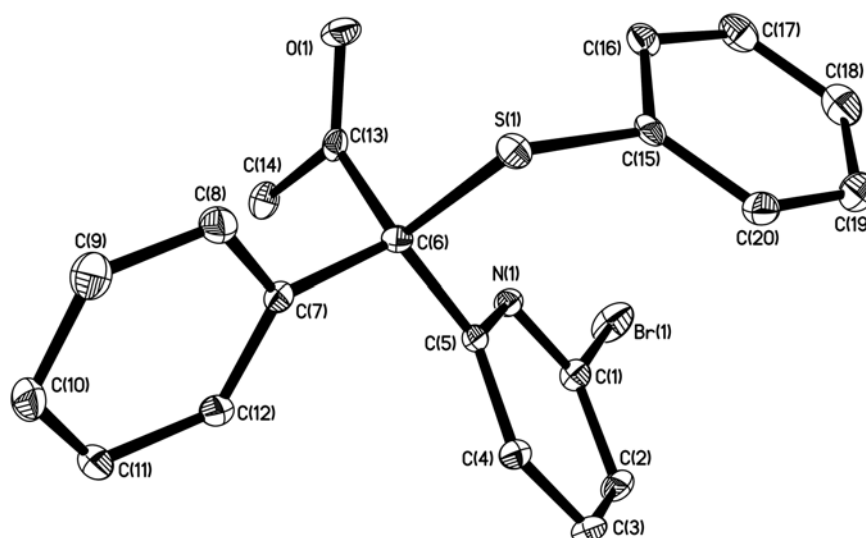

**Figure S1.** ORTEP diagram of complex **3aa**. Thermal ellipsoids are shown at the 30% level. All hydrogen atoms have been omitted for clarity.

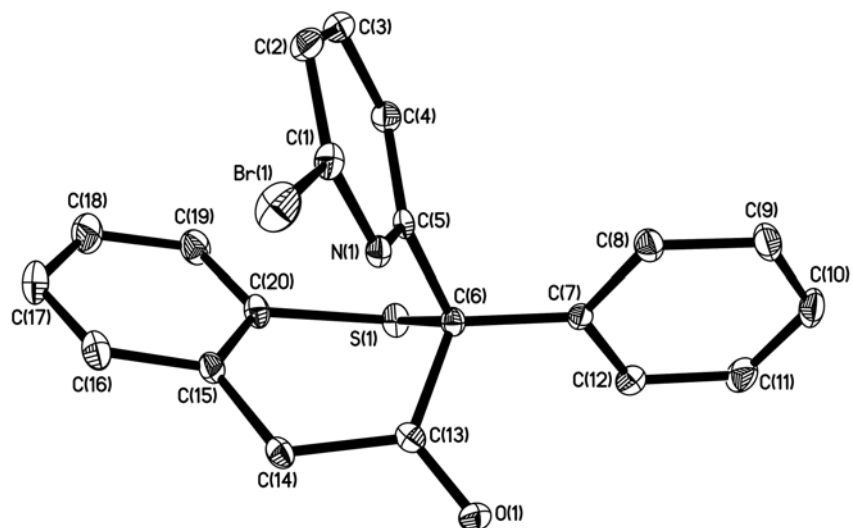

**Figure S2.** ORTEP diagram of complex **3zb**. Thermal ellipsoids are shown at the 30% level. All hydrogen atoms have been omitted for clarity.

**Table S1. Crystal Data and Summary of X-ray Data Collection for 3aa and 3zb**

| complex                                                                              | 3aa                                   | 3zb                                   |
|--------------------------------------------------------------------------------------|---------------------------------------|---------------------------------------|
| formula                                                                              | C <sub>20</sub> H <sub>16</sub> BrNOS | C <sub>20</sub> H <sub>14</sub> BrNOS |
| fw                                                                                   | 398.30                                | 396.29                                |
| crystal system                                                                       | triclinic                             | Monoclinic                            |
| space group                                                                          | P-1                                   | C2/c                                  |
| <i>a</i> (Å)                                                                         | 8.0631(16)                            | 21.028(4)                             |
| <i>b</i> (Å)                                                                         | 9.1192(18)                            | 11.443(2)                             |
| <i>c</i> (Å)                                                                         | 12.401(3)                             | 15.478(3)                             |
| $\alpha$ (°)                                                                         | 106.20(3)                             | 90                                    |
| $\beta$ (°)                                                                          | 95.56(3)                              | 113.67(3)                             |
| $\gamma$ (°)                                                                         | 96.77(3)                              | 90                                    |
| <i>V</i> (Å <sup>3</sup> )                                                           | 861.4(4)                              | 3411.3(14)                            |
| <i>Z</i>                                                                             | 2                                     | 8                                     |
| $\rho_{\text{calcd}}$ (g cm <sup>-3</sup> )                                          | 1.536                                 | 1.543                                 |
| $\mu$ (mm <sup>-1</sup> )                                                            | 2.513                                 | 2.538                                 |
| <i>F</i> (000)                                                                       | 404.0                                 | 1600                                  |
| cryst size (mm)                                                                      | 0.20×0.18×0.12                        | 0.20×0.18×0.12                        |
| max. 2 $\theta$ (°)                                                                  | 55.62                                 | 88.71                                 |
| no. of reflns collected                                                              | 10421                                 | 20089                                 |
| no. of indep reflns/ <i>R</i> <sub>int</sub>                                         | 4063 / 0.0448                         | 4058 / 0.0562                         |
| no. of params                                                                        | 218                                   | 218                                   |
| goodness-of-fit on <i>F</i> <sup>2</sup>                                             | 0.997                                 | 1.029                                 |
| <i>R</i> <sub>1</sub> , <i>wR</i> <sub>2</sub> [ <i>I</i> > 2 $\sigma$ ( <i>I</i> )] | 0.0318, 0.0677                        | 0.0358, 0.0700                        |
| <i>R</i> <sub>1</sub> , <i>wR</i> <sub>2</sub> (all data)                            | 0.0505, 0.0715                        | 0.0529, 0.0749                        |

## Preparation and Characterization of Products 3

### General Procedure A: Rh-Catalyzed denitrogenative thiocarbonylation of pyridotriazoles with thioesters

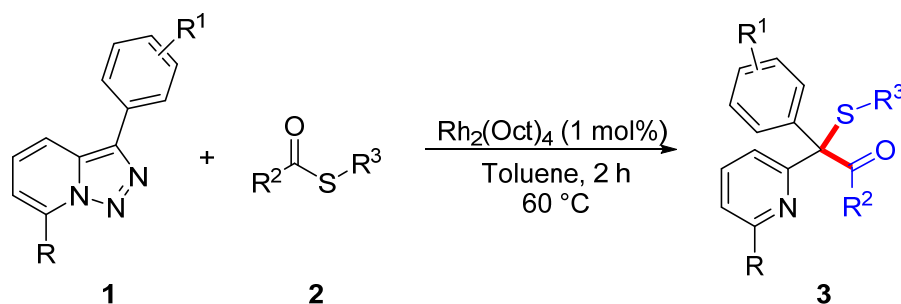

A mixture of pyridotriazole (**1**) (0.40 mmol, 2.0 equiv), Rh<sub>2</sub>(Oct)<sub>4</sub> (0.002 mmol, 1.0 mol %), and thioester (**2**) (0.20 mmol, 1.0 equiv) were weighted in a Schlenk tube equipped with a stir bar. Dry Toluene (2.0 mL) was added and the resulting mixture was stirred at 60 °C for 2 h using heating modular of parallel reactor under Ar atmosphere. The reaction was then cooled to room temperature and transferred to a 100 mL round-bottomed flask using CH<sub>2</sub>Cl<sub>2</sub>. Silica was added to the flask and volatiles were evaporated under reduced pressure. The purification was performed by flash column chromatography on silica gel with petroleum ether/EtOAc.

### 1-(6-bromopyridin-2-yl)-1-phenyl-1-(phenylthio)propan-2-one (3aa)

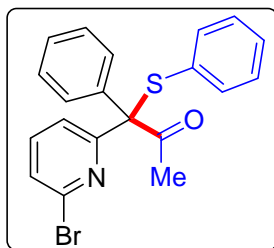

The title compound was isolated by column chromatography (eluent: EtOAc/ petroleum ether = 1/50) as a white solid in 97% yield (77.1 mg); M.p.: 151-153 °C;  $^1\text{H NMR}$  ( $\text{CDCl}_3$ , 400 MHz):  $\delta$  7.58 (d,  $J$  = 6.9 Hz, 2H), 7.40-7.30 (m, 5H), 7.22-7.18 (m, 1H), 7.10-7.05 (m, 5H), 2.18 (s, 3H);  $^{13}\text{C}\{^1\text{H}\}$  NMR ( $\text{DMSO-}d_6$ , 100 MHz):  $\delta$  199.7, 159.4, 139.7, 139.6, 137.0, 135.2, 130.7, 129.2, 129.0, 128.5, 128.4, 128.0, 126.9, 123.4, 76.9, 27.4; **HRMS (ESI)**  $m/z$ :  $[\text{M}+\text{H}]^+$  Calcd for  $\text{C}_{20}\text{H}_{17}\text{BrNOS}$  398.0209, Found: 398.0208.

### 1-(6-bromopyridin-2-yl)-1-phenyl-1-(phenylthio)pentan-2-one (3ab)

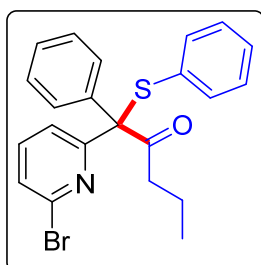

The title compound was isolated by column chromatography (eluent: EtOAc /petroleum ether = 1/50) as a pale yellow solid in 86% yield (73.4 mg); M.p.: 51-53 °C;  $^1\text{H NMR}$  ( $\text{CDCl}_3$ , 400 MHz):  $\delta$  7.60 (d,  $J$  = 6.9, 2H), 7.36-7.28 (m, 5H), 7.18 (t,  $J$  = 7.2 Hz, 1H), 7.08-6.98 (m, 5H), 2.57-2.49 (m, 1H), 2.25-2.18 (m, 1H), 1.66-1.56 (m, 1H), 1.53-1.42 (m, 1H), 0.74 (t,  $J$  = 7.4 Hz, 3H);  $^{13}\text{C}\{^1\text{H}\}$  NMR ( $\text{CDCl}_3$ , 100 MHz):  $\delta$  203.4, 160.1, 140.5, 137.8, 137.3, 135.6, 131.6, 129.6, 128.6, 128.3, 128.2, 128.0, 126.4, 123.2, 77.7, 42.0, 18.5, 13.6; **HRMS (ESI)**  $m/z$ :  $[\text{M}+\text{H}]^+$  Calcd for  $\text{C}_{22}\text{H}_{21}\text{BrNOS}$  426.0522, Found: 426.0530.

### 1-(6-bromopyridin-2-yl)-1,3-diphenyl-1-(phenylthio)propan-2-one (3ac)

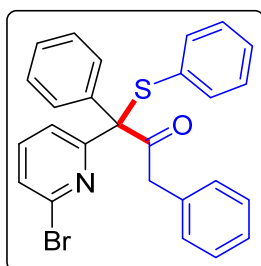

The title compound was isolated by column chromatography (eluent: EtOAc /petroleum ether = 1/50) as a pale yellow solid in 89% yield (84.6 mg); M.p.: 122-124 °C;  $^1\text{H NMR}$  ( $\text{CDCl}_3$ , 400 MHz):  $\delta$  7.62-7.60 (m, 2H), 7.40-7.31 (m, 5H), 7.23-7.17 (m, 4H), 7.10 (dd,  $J$  = 7.6, 0.6 Hz, 1H), 7.08-7.00 (m, 6H), 3.90 (d,  $J$  = 16.1 Hz, 1H), 3.60 (d,  $J$  = 16.1 Hz, 1H);  $^{13}\text{C}\{^1\text{H}\}$  NMR ( $\text{CDCl}_3$ , 100 MHz):  $\delta$  200.5, 160.0, 140.6, 138.0, 137.2, 135.7, 134.9, 131.4, 129.6, 128.7, 128.5, 128.3, 128.2, 128.0, 126.6, 126.5, 123.6, 77.4, 46.3 (one signal missing due to overlap); **HRMS (ESI)**  $m/z$ :  $[\text{M}+\text{H}]^+$  Calcd for  $\text{C}_{26}\text{H}_{21}\text{BrNOS}$  474.0522, Found: 474.0530.

### (E)-1-(6-bromopyridin-2-yl)-1,4-diphenyl-1-(phenylthio)but-3-en-2-one (3ad)

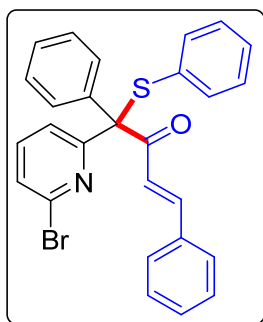

The title compound was isolated by column chromatography (eluent: EtOAc /petroleum ether = 1/50) as a pale yellow oil in 97% yield (94.4 mg); **<sup>1</sup>H NMR (CDCl<sub>3</sub>, 400 MHz):** δ 7.69 (d, *J* = 15.7 Hz, 1H), 7.51-7.48 (m, 2H), 7.47-7.44 (m, 2H), 7.40 (d, *J* = 7.7 Hz, 1H), 7.36-7.26 (m, 8H), 7.24-7.20 (m, 1H) 7.17-7.05 (m, 5H); **<sup>13</sup>C{<sup>1</sup>H} NMR (CDCl<sub>3</sub>, 100 MHz):** δ 191.4, 160.0, 142.3, 140.7, 138.3, 135.8, 134.7, 131.0, 130.2, 129.5, 129.0, 128.7, 128.4, 128.3, 128.1, 127.7, 126.6, 124.3, 123.5, 75.0 (one signal missing due to overlap); **HRMS (ESI) m/z:** [M+H]<sup>+</sup> Calcd for C<sub>27</sub>H<sub>21</sub>BrNOS 486.0522, Found: 486.0527.

### 2-(6-bromopyridin-2-yl)-1,2-diphenyl-2-(phenylthio)ethan-1-one (3ae)

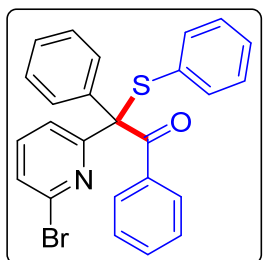

The title compound was isolated by column chromatography (eluent: EtOAc /petroleum ether = 1/50) as a pale yellow oil in 37% yield (34.2mg); **<sup>1</sup>H NMR (CDCl<sub>3</sub>, 400 MHz):** δ 7.73 (d, *J* = 7.4 Hz, 2H), 7.54 (dd, *J* = 8.3, 1.5 Hz, 2H), 7.40-7.31 (m, 3H), 7.28-7.17 (m, 7H), 7.08-6.99 (m, 4H); **<sup>13</sup>C{<sup>1</sup>H} NMR (CDCl<sub>3</sub>, 100 MHz):** δ 194.5, 160.4, 140.4, 138.7, 138.2, 136.2, 135.8, 132.0, 131.4, 130.6, 129.6, 128.9, 128.2, 128.0, 127.7, 127.6, 126.3, 123.6, 75.5; **HRMS (ESI) m/z:** [M+H]<sup>+</sup> Calcd for C<sub>25</sub>H<sub>19</sub>BrNOS 460.0365, Found: 460.0375.

### 1-(6-bromopyridin-2-yl)-1-phenyl-1-(o-tolylthio)propan-2-one (3af)

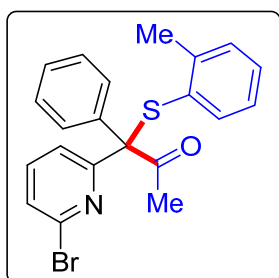

The title compound was isolated by column chromatography (eluent: EtOAc/ petroleum ether = 1/50) as a pale yellow solid in 93% yield (76.2 mg); M.p.: 113-115 °C; **<sup>1</sup>H NMR (CDCl<sub>3</sub>, 400 MHz):** δ 7.56 (dd, *J* = 8.1, 2.2 Hz, 2H), 7.36-7.30 (m, 5H), 7.09 (td, *J* = 7.2, 1.5 Hz, 1H), 7.03-6.99 (m, 2H), 6.89 (dd, *J* = 6.9, 1.0 Hz, 1H), 6.86 (dd, *J* = 7.1, 1.4 Hz, 1H), 2.18 (s, 3H), 1.94 (s, 3H); **<sup>13</sup>C{<sup>1</sup>H} NMR (CDCl<sub>3</sub>, 100 MHz):** δ 201.0, 159.8, 142.8, 140.6, 137.8, 137.4, 135.2, 131.0, 130.2, 129.7, 128.6, 128.2, 127.9, 126.5, 125.9, 122.8, 77.1, 27.6, 20.5; **HRMS (ESI):** [M+Na]<sup>+</sup> Calcd for C<sub>21</sub>H<sub>18</sub>BrNNaOS<sup>+</sup> 434.0185, Found: 434.0184.



### 1-(6-bromopyridin-2-yl)-1-((4-chlorophenyl)thio)-1-phenylpropan-2-one (3ag)

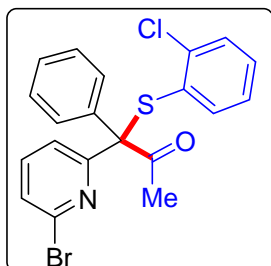

The title compound was isolated by column chromatography (eluent: EtOAc /petroleum ether = 1/50) as a pale yellow solid in 76% yield (65.7 mg); M.p.: 126-128 °C;  $^1\text{H NMR}$  ( $\text{CDCl}_3$ , 400 MHz):  $\delta$  7.58-7.56 (m, 2H), 7.39 (t,  $J$  = 7.8 Hz, 1H), 7.37-7.31 (m, 4H), 7.24 (dd,  $J$  = 8.8, 1.2 Hz, 1H), 7.15 (dd,  $J$  = 7.6, 0.9 Hz 1H), 7.11-7.06 (m, 2H), 6.97-6.92 (m, 1H), 2.22 (s, 3H);  $^{13}\text{C}\{^1\text{H}\}$  NMR ( $\text{CDCl}_3$ , 100 MHz):  $\delta$  200.7, 159.8, 140.5, 138.4, 137.6, 137.1, 135.1, 131.5, 129.6, 129.4, 129.0, 128.5, 128.1, 126.8, 126.6, 123.0, 76.8, 27.9; HRMS (ESI):  $[\text{M}+\text{Na}]^+$  Calcd for  $\text{C}_{20}\text{H}_{15}\text{BrClNNaOS}^+$  453.9638, Found: 453.9641.

### 1-(6-bromopyridin-2-yl)-1-phenyl-1-(*m*-tolylthio)propan-2-one (3ah)

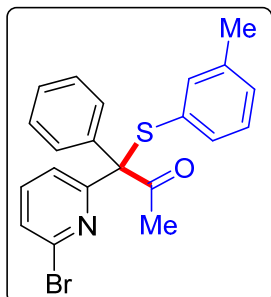

The title compound was isolated by column chromatography (eluent: EtOAc /petroleum ether = 1/50) as a white solid in 88% yield (72.7 mg); M.p.: 113-115 °C;  $^1\text{H NMR}$  ( $\text{CDCl}_3$ , 400 MHz):  $\delta$  7.58-7.55 (m, 2H), 7.40-7.29 (m, 5H), 7.10 (dd,  $J$  = 7.7, 0.7 Hz, 1H), 7.01-6.95 (m, 2H), 6.88 (d,  $J$  = 7.2 Hz, 1H), 6.82 (s, 1H), 2.18 (s, 3H), 2.15 (s, 3H);  $^{13}\text{C}\{^1\text{H}\}$  NMR ( $\text{CDCl}_3$ , 100 MHz):  $\delta$  200.8, 160.3, 140.5, 138.1, 137.9, 137.7, 136.2, 132.5, 131.1, 129.6, 129.5, 128.3, 128.1, 128.0, 126.4, 123.3, 77.2, 27.9, 21.1; HRMS (ESI)  $m/z$ :  $[\text{M}+\text{Na}]^+$  Calcd for  $\text{C}_{21}\text{H}_{18}\text{BrNNaOS}$  434.0185, Found: 434.0174.

### 1-(6-bromopyridin-2-yl)-1-phenyl-1-(*p*-tolylthio)propan-2-one (3ai)

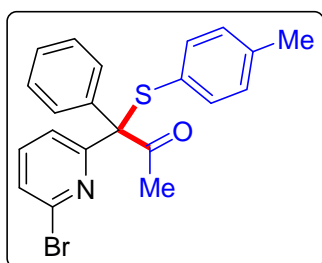

The title compound was isolated by column chromatography (eluent: EtOAc /petroleum ether = 1/50) as a yellow solid in 82% yield (67.8 mg); M.p.: 149-151 °C;  $^1\text{H NMR}$  ( $\text{CDCl}_3$ , 400 MHz):  $\delta$  7.60-7.58 (m, 2H), 7.40-7.29 (m, 5H), 7.10 (dd,  $J$  = 7.7, 0.8 Hz, 1H), 6.95-6.88 (m, 4H), 2.25 (s, 3H), 2.17 (s, 3H),  $^{13}\text{C}\{^1\text{H}\}$  NMR ( $\text{CDCl}_3$ , 100 MHz): 200.6, 160.4, 140.6, 139.2, 138.0, 137.9, 135.8, 129.6, 129.2, 128.3, 127.9, 127.7, 126.4, 123.1, 77.1, 27.8, 21.1; HRMS (ESI)  $m/z$ :  $[\text{M}+\text{Na}]^+$  Calcd for  $\text{C}_{21}\text{H}_{18}\text{BrNNaOS}$  434.0185, Found: 434.0178.

### 1-(6-bromopyridin-2-yl)-1-((4-methoxyphenyl)thio)-1-phenylpropan-2-one (3aj)

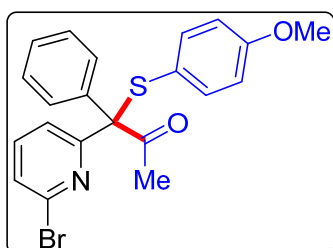

The title compound was isolated by column chromatography (eluent: EtOAc /petroleum ether = 1/50 to EtOAc /petroleum ether = 1/20) as a pale yellow solid in 92% yield (78.2 mg); M.p.: 191-193 °C;  $^1\text{H NMR}$  ( $\text{CDCl}_3$ , 400 MHz):  $\delta$  7.59-7.56 (m, 2H), 7.41-7.29 (m, 5H), 7.06 (dd,  $J$  = 7.6, 0.8 Hz, 1H), 6.99-6.96 (m, 2H), 6.63-6.60 (m, 2H), 3.72 (s, 3H), 2.16 (s, 3H);  $^{13}\text{C}\{^1\text{H}\}$  NMR ( $\text{DMSO}-d_6$ , 100 MHz):  $\delta$  199.6, 160.2, 159.5, 139.7, 139.4, 137.6, 137.1, 129.2, 128.3, 127.8, 126.6, 123.4, 120.7, 114.1, 76.9, 55.1, 27.4; HRMS (ESI)  $m/z$ :  $[\text{M}+\text{Na}]^+$  Calcd for  $\text{C}_{21}\text{H}_{18}\text{BrNNaO}_2\text{S}$  450.0134, Found: 450.0135.

### 1-(6-bromopyridin-2-yl)-1-((4-fluorophenyl)thio)-1-phenylpropan-2-one (3ak)

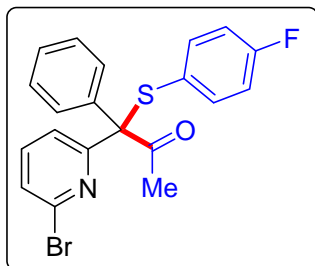

The title compound was isolated by column chromatography (eluent: EtOAc /petroleum ether = 1/50) as a pale yellow solid in 85% yield (70.6 mg); M.p.: 151-153 °C;  $^1\text{H NMR}$  ( $\text{CDCl}_3$ , 400 MHz):  $\delta$  7.57-7.55 (m, 2H), 7.41 (t,  $J$  = 7.8 Hz, 1H), 7.37-7.29 (m, 4H), 7.11 (d,  $J$  = 7.7 Hz, 1H), 7.06-7.02 (m, 2H), 6.77 (t,  $J$  = 8.6, 2H), 2.15 (s, 3H);  $^{13}\text{C}\{^1\text{H}\}$  NMR ( $\text{CDCl}_3$ , 100 MHz):  $\delta$  200.6, 163.3 (d,  $J_{\text{C-F}}$  = 250.0 Hz), 160.0, 140.7, 138.2 (d,  $J_{\text{C-F}}$  = 8.6 Hz), 138.1, 137.4, 129.4, 128.5, 128.1, 126.5, 123.2, 115.4 (d,  $J_{\text{C-F}}$  = 21.7 Hz), 77.5, 27.8 (one signal missing due to overlap);  $^{19}\text{F NMR}$  ( $\text{CDCl}_3$ , 376 MHz):  $\delta$  -111.5 (s); HRMS (ESI)  $m/z$ :  $[\text{M}+\text{H}]^+$  Calcd for  $\text{C}_{20}\text{H}_{16}\text{BrFNOS}$  416.0115, Found: 416.0115.

### 1-(6-bromopyridin-2-yl)-1-((4-chlorophenyl)thio)-1-phenylpropan-2-one (3al)

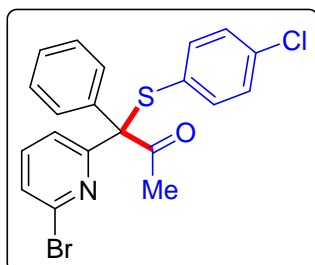

The title compound was isolated by column chromatography (eluent: EtOAc /petroleum ether = 1/50) as a pale yellow solid in 82% yield (71.0 mg); M.p.: 147-149 °C;  $^1\text{H NMR}$  ( $\text{CDCl}_3$ , 400 MHz):  $\delta$  7.57-7.55 (m, 2H), 7.42 (t,  $J$  = 7.8 Hz, 1H), 7.38-7.31 (m, 4H), 7.12 (dd,  $J$  = 7.7, 0.6 Hz, 1H), 7.07-7.03 (m, 2H), 7.00-6.96 (m, 2H), 2.15 (s, 3H);  $^{13}\text{C}\{^1\text{H}\}$  NMR ( $\text{CDCl}_3$ , 100 MHz):  $\delta$  200.5, 160.0, 140.7, 138.1, 137.4, 136.9, 135.3, 130.1, 129.4, 128.54, 128.52, 128.2, 126.6, 123.1, 77.5, 27.8; HRMS (ESI)  $m/z$ :  $[\text{M}+\text{H}]^+$  Calcd for  $\text{C}_{20}\text{H}_{16}\text{BrClNOS}$  431.9819, Found: 431.9821.

### 1-((4-bromophenyl)thio)-1-(6-bromopyridin-2-yl)-1-phenylpropan-2-one (3am)

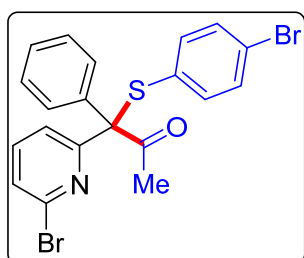

The title compound was isolated by column chromatography (eluent: EtOAc /petroleum ether = 1/50) as a white solid in 97% yield (92.1 mg); M.p.: 148-150 °C; **<sup>1</sup>H NMR (CDCl<sub>3</sub>, 400 MHz):** δ 7.57-7.54 (m, 2H), 7.42 (t, *J* = 7.8 Hz, 1H), 7.38-7.30 (m, 4H), 7.22-7.19 (m, 2H), 7.12 (dd, *J* = 7.7, 0.7 Hz, 1H), 6.93-6.90 (m, 2H), 2.15 (s, 3H); **<sup>13</sup>C{<sup>1</sup>H} NMR (CDCl<sub>3</sub>, 100 MHz):** δ 200.4, 159.8, 140.6, 138.2, 137.2, 137.0, 131.4, 130.6, 129.3, 128.5, 128.2, 126.6, 123.5, 123.0, 77.4, 27.7; **HRMS (ESI) m/z:** [M+H]<sup>+</sup> Calcd for C<sub>20</sub>H<sub>16</sub>Br<sub>2</sub>NOS 475.9314, Found: 475.9316.

### 1-(6-bromopyridin-2-yl)-1-((4-iodophenyl)thio)-1-phenylpropan-2-one (3an)

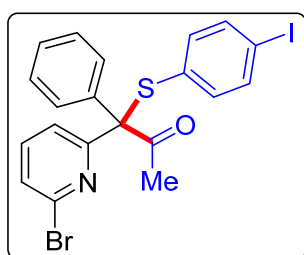

The title compound was isolated by column chromatography (eluent: EtOAc /petroleum ether = 1/50) as an orange solid in 97% yield (101.6 mg); M.p.: 126-128 °C; **<sup>1</sup>H NMR (CDCl<sub>3</sub>, 400 MHz):** δ 7.57-7.54 (m, 2H), 7.44-7.38 (m, 3H), 7.37-7.31 (m, 4H), 7.12 (dd, *J* = 7.6, 0.5 Hz, 1H), 6.78-6.75 (m, 2H), 2.15 (s, 3H); **<sup>13</sup>C{<sup>1</sup>H} NMR (CDCl<sub>3</sub>, 100 MHz):** δ 200.5, 159.9, 140.7, 138.2, 137.5, 137.3, 137.0, 131.5, 129.4, 128.6, 128.2, 126.7, 123.1, 95.4, 77.4, 27.8; **HRMS (ESI) m/z:** [M+H]<sup>+</sup> Calcd for C<sub>20</sub>H<sub>16</sub>BrINOS 523.9175, Found: 523.9178.

### 4-((1-(6-bromopyridin-2-yl)-2-oxo-1-phenylpropyl)thio)benzonitrile (3ao)

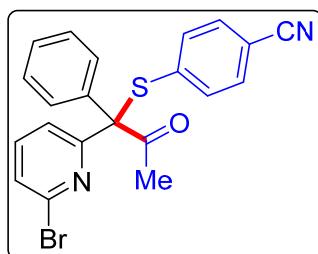

The title compound was isolated by column chromatography (eluent: EtOAc /petroleum ether = 1/50 to EtOAc /petroleum ether = 1/20) as a pale yellow solid in 76% yield (64.2 mg); M.p.: 135-137 °C; **<sup>1</sup>H NMR (CDCl<sub>3</sub>, 400 MHz):** δ 7.52 (dd, *J* = 8.0, 1.4 Hz, 2H), 7.46 (t, *J* = 7.8 Hz, 1H), 7.39-7.33 (m, 6H), 7.27-7.25 (m, 1H), 7.17 (d, *J* = 8.3 Hz, 2H), 2.17 (s, 3H); **<sup>13</sup>C{<sup>1</sup>H} NMR (CDCl<sub>3</sub>, 100 MHz):** δ 200.4, 159.6, 140.6, 139.2, 138.5, 136.8, 133.9, 131.6, 129.0, 128.8, 128.5, 126.9, 123.1, 118.3, 111.3, 77.4, 27.9; **HRMS (ESI) m/z:** [M+H]<sup>+</sup> Calcd for C<sub>21</sub>H<sub>16</sub>BrN<sub>2</sub>OS 423.0161, Found: 423.0165.

### 1-(6-bromopyridin-2-yl)-1-((4-nitrophenyl)thio)-1-phenylpropan-2-one(3ap)

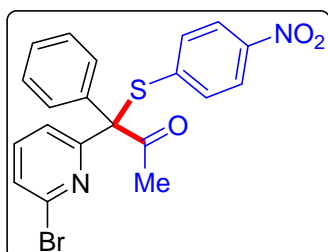

The title compound was isolated by column chromatography (eluent: EtOAc /petroleum ether = 1/50 to EtOAc /petroleum ether = 1/10) as a pale orange solid in 86% yield (76.6 mg); M.p.: 89-91 °C; **<sup>1</sup>H NMR (CDCl<sub>3</sub>, 400 MHz):** δ 7.94-7.90 (m, 2H), 7.53 (dd, *J* = 8.3, 1.8 Hz, 2H), 7.47 (t, *J* = 7.8 Hz, 1H), 7.39-7.33 (m, 4H), 7.29 (dd, *J* = 7.7, 0.5 Hz, 1H), 7.24-7.20 (m, 2H), 2.19 (s, 3H); **<sup>13</sup>C{<sup>1</sup>H} NMR (CDCl<sub>3</sub>, 100 MHz):** δ 200.4, 159.6, 146.9, 141.9, 140.6, 138.7, 136.8, 133.3, 128.93, 128.88, 128.6, 127.0, 123.14, 123.08, 77.4, 28.0; **HRMS (ESI) m/z:** [M+H]<sup>+</sup> Calcd for C<sub>20</sub>H<sub>16</sub>BrN<sub>2</sub>O<sub>3</sub>S 443.0060, Found: 443.0062.

### 1-((4-acetylphenyl)thio)-1-(6-bromopyridin-2-yl)-1-phenylpropan-2-one (3aq)

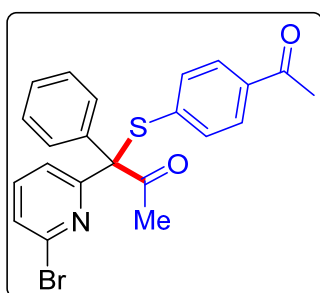

The title compound was isolated by column chromatography (eluent: EtOAc /petroleum ether = 1/50 to EtOAc /petroleum ether = 1/10) as a pale yellow oil in 93% yield (82.1 mg); **<sup>1</sup>H NMR (CDCl<sub>3</sub>, 400 MHz):** δ 7.67-7.64 (m, 2H), 7.57-7.55 (m, 2H), 7.42 (t, *J* = 7.8 Hz, 1H), 7.38-7.30 (m, 4H), 7.22 (dd, *J* = 7.7, 0.7 Hz, 1H), 7.16-7.13 (m, 2H), 2.51 (s, 3H), 2.18 (s, 3H); **<sup>13</sup>C{<sup>1</sup>H} NMR (CDCl<sub>3</sub>, 100 MHz):** δ 200.4, 197.4, 159.9, 140.5, 138.7, 138.4, 137.1, 136.1, 133.5, 129.1, 128.6, 128.3, 128.0, 126.7, 123.0, 77.1, 27.9, 26.5; **HRMS (ESI) m/z:** [M+Na]<sup>+</sup> Calcd for C<sub>22</sub>H<sub>18</sub>BrNNaO<sub>2</sub>S 462.0134, Found: 462.0142.

### 1-(6-bromopyridin-2-yl)-1-(naphthalen-2-ylthio)-1-phenylpropan-2-one (3ar)

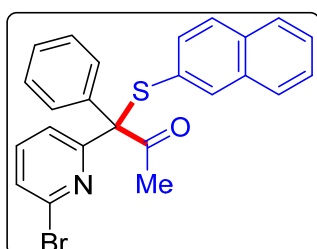

The title compound was isolated by column chromatography (eluent: EtOAc /petroleum ether = 1/50 to EtOAc /petroleum ether = 1/10) as a pale orange solid in 98% yield (88.3 mg); M.p.: 115-117 °C; **<sup>1</sup>H NMR (CDCl<sub>3</sub>, 400 MHz):** δ 7.72 (d, *J* = 7.6 Hz, 1H), 7.62 (d, *J* = 6.8 Hz, 2H), 7.58 (d, *J* = 7.8 Hz, 1H), 7.54 (t, *J* = 4.1 Hz, 2H), 7.46-7.39 (m, 2H), 7.37-7.32 (m, 3H), 7.31 (d, *J* = 7.6 Hz, 1H), 7.28 (br s, 1H), 7.11 (dd, *J* = 8.5, 1.2 Hz, 1H), 7.05 (dd, *J* = 6.8, 1.1 Hz, 1H), 2.21 (s, 3H); **<sup>13</sup>C{<sup>1</sup>H} NMR (CDCl<sub>3</sub>, 100 MHz):** δ 200.8, 160.0, 140.6, 138.0, 137.6, 135.6, 133.0, 132.9, 131.7, 131.0, 129.5, 128.9, 128.4,

128.1, 127.7, 127.4, 126.7, 126.5, 126.1, 123.1, 77.5, 27.8; **HRMS (ESI)** m/z: [M+Na]<sup>+</sup> Calcd for C<sub>24</sub>H<sub>18</sub>BrNNaOS 470.0185, Found: 470.0189.

### 1-(6-bromopyridin-2-yl)-1-phenyl-1-(thiophen-2-ylthio)propan-2-one (3as)

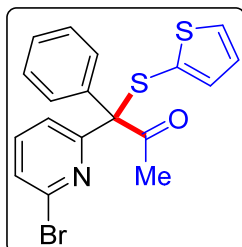

The title compound was isolated by column chromatography (eluent: EtOAc /petroleum ether = 1/50) as a white solid in 95% yield (76.7 mg); M.p.: 116-118 °C; **<sup>1</sup>H NMR (CDCl<sub>3</sub>, 400 MHz):** δ 7.57 (dd, *J* = 8.2, 1.6 Hz, 2H), 7.43-7.32 (m, 5H), 7.27-7.26 (m, 1H), 6.97 (d, *J* = 7.5 Hz, 1H), 6.82-6.79 (m, 1H), 6.73 (dd, *J* = 3.5, 1.0 Hz, 1H), 2.17 (s, 3H); **<sup>13</sup>C{<sup>1</sup>H} NMR (CDCl<sub>3</sub>, 100 MHz):** δ 201.1, 159.6, 140.8, 138.0, 137.8, 136.9, 131.8, 129.6, 129.5, 128.6,

128.3, 126.9, 126.7, 123.0, 79.2, 27.7; **HRMS (ESI):** [M+H]<sup>+</sup> Calcd for C<sub>18</sub>H<sub>15</sub>BrNOS<sub>2</sub> 403.9773, Found: 403.9777.

### 1-(6-bromopyridin-2-yl)-1-phenyl-1-(thiophen-2-ylthio)propan-2-one (3at)

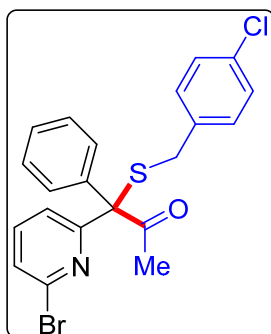

The title compound was isolated by column chromatography (eluent: EtOAc /petroleum ether = 1/50) as a yellow oil in 85% yield (76.0 mg); **<sup>1</sup>H NMR (CDCl<sub>3</sub>, 400 MHz):** δ 7.60-7.58 (m, 2H), 7.47 (t, *J* = 7.8 Hz, 1H), 7.39 (dd, *J* = 7.5, 0.6 Hz, 1H), 7.38-7.34 (m, 3H) 7.31-7.29 (m, 1H), 7.23-7.20 (m, 2H), 7.15-7.12 (m, 2H), 3.57 (d, *J* = 12.1 Hz, 1H), 3.40 (d, *J* = 12.2 Hz, 1H), 2.22 (s, 3H); **<sup>13</sup>C{<sup>1</sup>H} NMR (CDCl<sub>3</sub>, 100 MHz):** δ 200.0,

161.1, 140.7, 138.8, 137.5, 134.9, 132.9, 130.5, 129.0, 128.6, 128.0, 126.7, 122.3, 72.7, 34.9, 27.8 (one signal missing due to overlap); **HRMS (ESI)** m/z: [M+H]<sup>+</sup> Calcd for C<sub>21</sub>H<sub>18</sub>BrClNOS 445.9976, Found: 445.9977.

### methyl 2-((1-(6-bromopyridin-2-yl)-2-oxo-1-phenylpropyl)thio)acetate (3au)

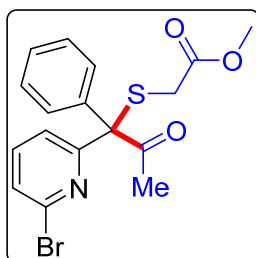

The title compound was isolated by column chromatography (eluent: EtOAc /petroleum ether = 1/10) as a pale yellow oil in 67% yield (52.6 mg); **<sup>1</sup>H NMR (CDCl<sub>3</sub>, 400 MHz):** δ 7.55 (t, *J* = 1.5 Hz, 1H), 7.53-7.51 (m, 2H), 7.43 (dd, *J* = 7.7, 0.5 Hz, 1H), 7.38 (dd, *J* = 7.8, 0.5 Hz, 1H), 7.36-7.33 (m, 2H), 7.31-7.28 (m, 1H), 3.61 (s, 3H), 3.26 (d, *J* = 15.6 Hz, 1H), 3.11 (d, *J* = 15.6 Hz, 1H), 2.18 (s, 3H); **<sup>13</sup>C{<sup>1</sup>H} NMR (CDCl<sub>3</sub>, 100 MHz):** δ 200.3, 169.6, 160.7, 140.8, 138.9, 137.0, 129.1, 128.6, 128.1, 126.9, 122.4, 72.3, 52.4, 33.1, 27.7; **HRMS (ESI) m/z:** [M+Na]<sup>+</sup> Calcd for C<sub>17</sub>H<sub>16</sub>BrNNO<sub>3</sub>S 415.9926, Found: 415.9933.

### 1-(6-bromopyridin-2-yl)-1-((furan-2-ylmethyl)thio)-1-phenylpropan-2-one (3av)

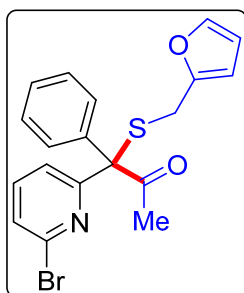

The title compound was isolated by column chromatography (eluent: EtOAc /petroleum ether = 1/50) as an orange oil in 55% yield (43.8 mg); **<sup>1</sup>H NMR (CDCl<sub>3</sub>, 400 MHz):** δ 7.59 (d, *J* = 7.8 Hz, 2H), 7.48 (t, *J* = 7.7 Hz, 1H), 7.41 (d, *J* = 7.6 Hz, 1H), 7.37-7.28 (m, 5H), 6.25-6.23 (m, 1H), 6.06 (d, *J* = 2.9 Hz, 1H), 3.67 (d, *J* = 13.9 Hz, 1H), 3.51 (d, *J* = 13.9 Hz, 1H), 2.22 (s, 3H); **<sup>13</sup>C{<sup>1</sup>H} NMR (CDCl<sub>3</sub>, 100 MHz):** δ 200.3, 161.1, 149.8, 142.2, 140.7, 138.8, 137.5, 129.1, 128.6, 127.9, 126.7, 122.2, 110.5, 108.1, 72.4, 27.8, 27.7; **HRMS (ESI) m/z:** [M+H]<sup>+</sup> Calcd for C<sub>19</sub>H<sub>17</sub>BrNO<sub>2</sub>S 402.0158, Found: 402.0160.

### 2-(6-bromopyridin-2-yl)-2-(methylthio)-1,2-diphenylethan-1-one (3aw)

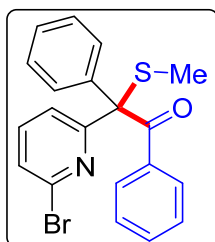

The title compound was isolated by column chromatography (eluent: CH<sub>2</sub>Cl<sub>2</sub> /petroleum ether = 1/5) as an orange oil in 84% yield (67.2 mg); **<sup>1</sup>H NMR (CDCl<sub>3</sub>, 400 MHz):** δ 7.77 (d, *J* = 7.4 Hz, 2H), 7.63 (d, *J* = 7.5 Hz, 2H), 7.43-7.41 (m, 2H), 7.39-7.28 (m, 4H), 7.25-7.20 (m, 3H), 1.96 (s, 3H) **<sup>13</sup>C{<sup>1</sup>H} NMR (CDCl<sub>3</sub>, 100 MHz):** δ 193.5, 161.6, 140.7, 138.7, 138.6, 136.2, 131.7, 130.3, 129.2, 128.3, 127.5, 126.3, 122.0, 70.0, 14.3 (one signal missing due to overlap); **HRMS (ESI) m/z:** [M+H]<sup>+</sup> Calcd for C<sub>20</sub>H<sub>17</sub>BrNOS 398.0209, Found: 398.0213.

### 1-((1-(6-bromopyridin-2-yl)-2-oxo-1,2-diphenylethyl)thio)pentan-3-one (3ax)

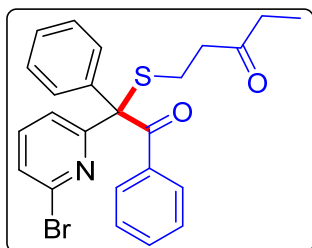

The title compound was isolated by column chromatography (eluent: EtOAc /petroleum ether = 1/50 to EtOAc /petroleum ether = 1/20) as a pale yellow solid in 88% yield (82.9 mg); M.p.: 78-80 °C;  $^1\text{H NMR}$  ( $\text{CDCl}_3$ , 400 MHz):  $\delta$  7.77 (dd,  $J$  = 8.6, 1.3 Hz, 2H), 7.58 (dd,  $J$  = 8.7, 1.3 Hz, 2H), 7.44-7.27 (m, 6H), 7.26-7.20 (m, 3H), 2.69-2.63 (m, 2H), 2.61-2.56 (m, 2H), 2.30 (q,  $J$  = 7.3 Hz, 2H), 0.97 (t,  $J$  = 7.3 Hz, 3H);  $^{13}\text{C}\{^1\text{H}\}$  NMR ( $\text{CDCl}_3$ , 100 MHz):  $\delta$  209.3, 194.6, 161.7, 140.6, 139.1, 138.7, 136.0, 131.8, 130.4, 129.2, 128.3, 127.7, 127.6, 126.4, 122.2, 70.7, 41.3, 35.7, 25.4, 7.6; HRMS (ESI)  $m/z$ :  $[\text{M}+\text{H}]^+$  Calcd for  $\text{C}_{24}\text{H}_{23}\text{BrNO}_2\text{S}$  468.0627, Found: 468.0633.

### 1-(6-bromopyridin-2-yl)-1-phenyl-1-(prop-2-yn-1-ylthio)propan-2-one (3ay)

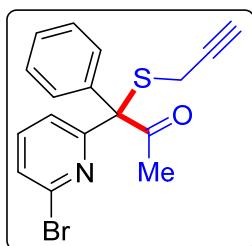

The title compound was isolated by column chromatography (eluent: EtOAc /petroleum ether = 1/50) as an orange oil in 86% yield (61.7 mg);  $^1\text{H NMR}$  ( $\text{CDCl}_3$ , 400 MHz):  $\delta$  7.56-7.50 (m, 3H), 7.42 (dd,  $J$  = 7.7, 0.6 Hz, 1H), 7.40-7.34 (m, 3H), 7.32-7.29 (m, 1H), 3.17 (dd,  $J$  = 16.0, 2.7 Hz, 1H), 3.00 (dd,  $J$  = 16.0, 2.7 Hz, 1H), 2.22 (s, 3H), 2.12 (t,  $J$  = 2.7 Hz, 1H);  $^{13}\text{C}\{^1\text{H}\}$  NMR ( $\text{CDCl}_3$ , 100 MHz):  $\delta$  200.4, 160.7, 140.8, 138.9, 137.0, 129.0, 128.6, 128.1, 126.9, 122.5, 78.7, 72.5, 71.7, 27.8, 18.9; HRMS (ESI)  $m/z$ :  $[\text{M}+\text{H}]^+$  Calcd for  $\text{C}_{17}\text{H}_{15}\text{BrNOS}$  360.0052, Found: 360.0046.

### 2-(6-bromopyridin-2-yl)-1,2-diphenyl-2-(prop-2-yn-1-ylthio)ethan-1-one (3az)

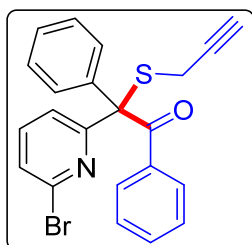

The title compound was isolated by column chromatography (eluent: EtOAc /petroleum ether = 1/50) as a pale orange oil in 97% yield (82.3 mg);  $^1\text{H NMR}$  ( $\text{CDCl}_3$ , 400 MHz):  $\delta$  7.73 (dd,  $J$  = 8.4, 1.1 Hz, 2H), 7.60-7.58 (m, 2H), 7.43 (d,  $J$  = 7.6 Hz, 1H), 7.40-7.27 (m, 6H), 7.25-7.20 (m, 2H), 3.20 (d,  $J$  = 2.7 Hz, 2H), 2.10 (t,  $J$  = 2.7 Hz, 1H);  $^{13}\text{C}\{^1\text{H}\}$  NMR ( $\text{CDCl}_3$ , 100 MHz):  $\delta$  194.6, 161.0, 140.7, 138.7, 138.1, 135.8, 132.0, 130.3, 129.1, 128.5, 127.9, 127.7, 126.6, 122.5, 78.6, 71.9, 71.1, 19.7; HRMS (ESI)  $m/z$ :  $[\text{M}+\text{H}]^+$  Calcd for  $\text{C}_{22}\text{H}_{17}\text{BrNOS}$  422.0209, Found: 422.0204.

### 2-(allylthio)-2-(6-bromopyridin-2-yl)-1,2-diphenylethan-1-one (3za)

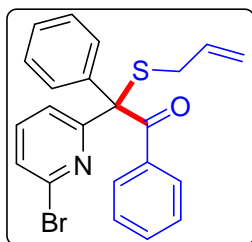

The title compound was isolated by column chromatography (eluent: EtOAc /petroleum ether = 1/50) as a pale yellow oil in 72% yield (60.5 mg); **<sup>1</sup>H NMR (CDCl<sub>3</sub>, 400 MHz):** δ 7.78 (d, *J* = 8.6 Hz, 2H), 7.61 (dd, *J* = 8.9, 1.4 Hz, 2H) 7.42 (t, *J* = 7.6 Hz, 1H), 7.39-7.28 (m, 5H), 7.27-7.21 (m, 3H), 5.78-5.68 (m, 1H), 5.11 (dd, *J* = 16.9, 1.3 Hz, 1H), 5.02 (d, *J* =

10.0 Hz, 1H), 3.15-3.05 (m, 2H); **<sup>13</sup>C{<sup>1</sup>H} NMR (CDCl<sub>3</sub>, 100 MHz):** δ 194.4, 161.8, 140.7, 139.0, 138.6, 136.2, 132.5, 131.8, 130.3, 129.2, 128.4, 127.7, 127.6, 126.4, 122.2, 118.5, 70.7, 34.9; **HRMS (ESI) m/z:** [M+H]<sup>+</sup> Calcd for C<sub>22</sub>H<sub>19</sub>BrNOS 424.0365, Found: 424.0371.

### 2-(allylthio)-2-(6-bromopyridin-2-yl)-1,2-diphenylethan-1-one (3zb)

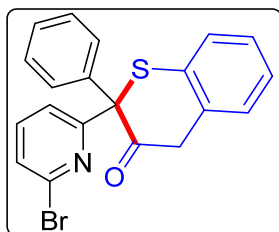

The title compound was isolated by column chromatography (eluent: EtOAc /petroleum ether = 1/50) as a pale yellow solid in 86% yield (67.9 mg); M.p.: 149-151 °C; **<sup>1</sup>H NMR (CDCl<sub>3</sub>, 400 MHz):** δ 7.38 (t, *J* = 7.7 Hz, 1H), 7.31-7.21 (m, 8H), 7.10-7.02 (m, 3H), 4.11 (d, *J* =

20.3 Hz, 1H), 3.93 (d, *J* = 20.3 Hz, 1H); **<sup>13</sup>C{<sup>1</sup>H} NMR (CDCl<sub>3</sub>, 100 MHz):** δ 200.7, 160.6, 139.8, 138.6, 137.1, 135.4, 131.4, 129.2, 128.4, 128.3, 128.13, 128.10, 127.3, 126.9, 126.7, 123.0, 67.3, 45.3; **HRMS (ESI) m/z:** [M+H]<sup>+</sup> Calcd for C<sub>20</sub>H<sub>15</sub>BrNOS 396.0052, Found: 396.0054.

### 3-(6-bromopyridin-2-yl)-3-phenylisothiochroman-4-one (3zc)

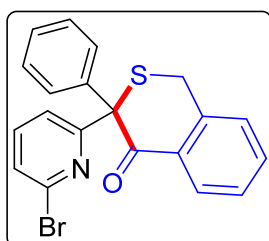

The title compound was isolated by column chromatography (eluent: EtOAc /petroleum ether = 1/50) as a pale pink solid in 62% yield (48.6 mg); M.p.: 186-188 °C; **<sup>1</sup>H NMR (CDCl<sub>3</sub>, 400 MHz):** δ 8.17 (d, *J* = 7.4 Hz, 1H), 7.44 (t, *J* = 7.7 Hz, 1H), 7.38-7.29 (m, 8H), 7.03 (d, *J* = 7.4 Hz, 2H), 3.69 (d, *J* = 16.9 Hz, 1H), 3.61 (d, *J* = 16.9 Hz, 1H); **<sup>13</sup>C{<sup>1</sup>H} NMR (CDCl<sub>3</sub>,**

**100 MHz):** δ 191.0, 160.2, 140.9, 140.5, 138.1, 137.4, 133.5, 132.2, 129.8, 128.7, 128.6, 128.2, 127.5, 127.4, 126.8, 124.2, 64.8, 28.9; **HRMS (ESI) m/z:** [M+H]<sup>+</sup> Calcd for C<sub>20</sub>H<sub>15</sub>BrNOS 396.0052, Found: 396.0059.



### 1-((4-bromophenyl)thio)-1-(6-bromopyridin-2-yl)-1-phenylnonadecan-2-one (3zd)

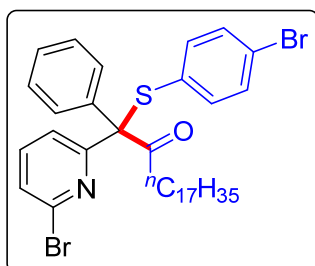

The title compound was isolated by column chromatography (eluent: EtOAc/ petroleum ether = 1/50 to EtOAc/ petroleum ether = 1/20) as a yellow solid in 99% yield (140.0 mg); M.p.: 51-53 °C; **<sup>1</sup>H NMR (CDCl<sub>3</sub>, 400 MHz):** δ 7.56 (dd, *J* = 8.2, 1.5 Hz, 2H), 7.42-7.29 (m, 5H), 7.18 (d, *J* = 8.5 Hz, 2H), 7.06 (d, *J* = 7.6 Hz,

1H), 6.88 (d, *J* = 8.5 Hz, 2H), 2.55-2.47 (m, 1H), 2.23-2.15 (m, 1H), 1.62-1.51 (m, 1H), 1.48-1.37 (m, 1H), 1.32-1.07 (m, 28H), 0.88 (t, *J* = 6.6 Hz, 3H); **<sup>13</sup>C{<sup>1</sup>H} NMR (CDCl<sub>3</sub>, 100 MHz):** δ 203.3, 160.0, 140.6, 138.0, 137.12, 137.08, 131.3, 130.9, 129.4, 128.5, 128.2, 126.5, 123.4, 123.2, 77.8, 40.1, 31.8, 29.8, 29.63, 29.59, 29.5, 29.33, 29.29, 29.2, 28.9, 25.1, 22.6, 14.1 (five signals missing due to overlap); **HRMS (ESI):** [M+Na]<sup>+</sup> Calcd for C<sub>36</sub>H<sub>47</sub>Br<sub>2</sub>NNaOS 722.1637, Found: 722.1644.

### (5*S*,8*R*,9*S*,10*S*,13*R*,14*S*,17*R*)-17-(6-((4-bromophenyl)thio)-6-(6-bromopyridin-2-yl)-5-oxo-6-phenylhexan-2-yl)-10,13-dimethyldodecahydro-3*H*-cyclopenta[*a*]phenanthrene-3,7,12(2*H*,4*H*)-trione (3ze)

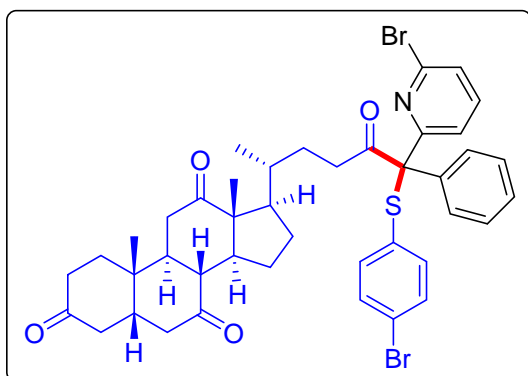

The title compound was isolated by column chromatography (eluent: EtOAc/ petroleum ether = 1/20 to EtOAc/ petroleum ether = 1/2) as a yellow oil in 83% yield (136.1 mg, mixture of two diastereoisomers, *d.r.* = 1:1); **<sup>1</sup>H NMR (CDCl<sub>3</sub>, 400 MHz):** δ 7.59-7.55 (m, 2H), 7.42-7.30 (m, 5H), 7.17 (dd, *J* = 8.5, 1.9 Hz, 2H), 7.04 (d, *J* = 7.5 Hz) +

6.99 (d, *J* = 7.2 Hz) (1H), 6.85 (dd, *J* = 8.5, 2.6 Hz, 2H), 2.92-2.76 (m, 3H), 2.66-1.55(m, 21H), 1.37 (s, 3H), 1.00 (s) + 0.95 (s) (3H), 0.64 (d, *J* = 6.5 Hz) + 0.53 (d, *J* = 6.6 Hz) (3H); **<sup>13</sup>C{<sup>1</sup>H} NMR (CDCl<sub>3</sub>, 100 MHz):** δ 212.0, 211.9, 208.9, 208.6, 203.7, 160.1, 159.9, 140.71, 140.68, 138.0, 137.14, 137.10, 137.0, 131.4, 130.94, 130.88, 129.5, 128.62, 128.59, 128.32, 128.27, 126.6, 123.48, 123.43, 123.29, 123.23, 78.2, 78.0, 56.84, 56.78, 51.7, 51.6, 49.0, 46.8, 45.6, 45.5, 44.9, 42.7, 38.6, 37.1, 37.0, 36.4, 36.0, 35.2, 35.1, 30.7, 30.6, 27.39, 27.36, 25.08, 25.05,

21.9, 18.9, 18.7, 11.9, 11.8 (20 signals missing due to overlap); **HRMS (ESI):**  $[M+Na]^+$  Calcd for  $C_{42}H_{45}Br_2NNaO_4S^+$  840.1328, Found: 840.1332.

**1-((4-bromophenyl)thio)-1-(6-bromopyridin-2-yl)-4-(4,5-diphenyloxazol-2-yl)-1-phenylbutan-2-one (3zf)**

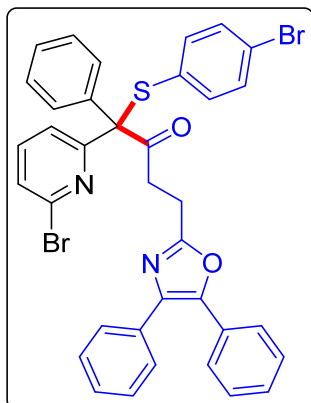

The title compound was isolated by column chromatography (eluent: EtOAc/ petroleum ether = 1/20 to EtOAc/ petroleum ether = 1/2) as a yellow solid in 94% yield (133.7 mg); M.p.: 146-148 °C;  **$^1H$  NMR ( $CDCl_3$ , 400 MHz):**  $\delta$  7.58-7.52 (m, 6H), 7.42-7.28 (m, 11H), 7.19 (d,  $J$  = 8.4 Hz, 2H), 7.10 (d,  $J$  = 7.6 Hz, 1H), 6.91 (d,  $J$  = 8.4 Hz, 2H), 3.23-3.10 (m, 3H), 2.84-2.74 (m, 1H);  **$^{13}C\{^1H\}$  NMR ( $CDCl_3$ , 100 MHz):**  $\delta$  201.3, 162.2, 159.8, 145.0, 140.6,

138.2, 137.0, 136.7, 134.9, 132.4, 131.4, 130.6, 129.2, 128.8, 128.7, 128.5, 128.39, 128.36, 128.2, 127.9, 127.8, 126.7, 126.3, 123.5, 123.3, 77.2, 37.1, 23.7; **HRMS (ESI):**  $[M+Na]^+$  Calcd for  $C_{36}H_{26}Br_2N_2NaO_2S$  730.9974, Found: 730.9978.

**1-(6-bromopyridin-2-yl)-1-phenyl-1-(phenylselanyl)propan-2-one (3zg)**

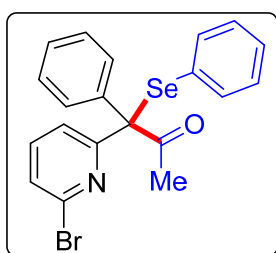

The title compound was isolated by column chromatography (eluent: EtOAc/ petroleum ether = 1/50) as a pale yellow solid in 68% yield (60.1 mg); M.p.: 125-127 °C;  **$^1H$  NMR ( $CDCl_3$ , 400 MHz):**  $\delta$  7.54 (dd,  $J$  = 7.8, 1.7 Hz, 2H), 7.36-7.21 (m, 6H), 7.11-7.05 (m, 4H), 6.84 (dd,  $J$  = 6.8, 1.7 Hz, 1H), 2.17 (s, 3H);  **$^{13}C\{^1H\}$  NMR ( $DMSO-d_6$ , 100 MHz):**  $\delta$

200.9, 161.0, 140.59, 140.57, 137.99, 137.95, 137.3, 130.0, 129.0, 128.4, 128.3, 127.8, 126.3, 122.8, 75.1, 27.7; **HRMS (ESI)**  $m/z$ :  $[M+H]^+$  Calcd for  $C_{20}H_{17}BrNOSe$  445.9653, Found: 445.9658.

### 1-(6-bromopyridin-2-yl)-1-phenyl-1-(*m*-tolylthio)propan-2-one (3ba)

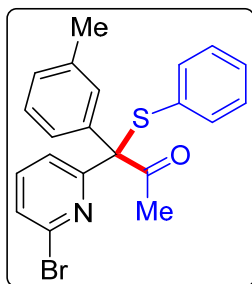

The title compound was isolated by column chromatography (eluent: EtOAc/ petroleum ether = 1/50) as a yellow solid in 98% yield (80.7 mg); M.p.: 110-112 °C;  $^1\text{H NMR}$  ( $\text{CDCl}_3$ , 400 MHz):  $\delta$  7.40 (s, 1H), 7.39-7.34 (m, 2H), 7.29 (dd,  $J$  = 7.8, 0.5 Hz, 1H), 7.25-7.17 (m, 2H), 7.12 (d,  $J$  = 7.6 Hz, 1H), 7.10-7.05 (m, 5H), 2.33 (s, 3H), 2.17 (s, 3H);  $^{13}\text{C}\{^1\text{H}\}$  NMR ( $\text{CDCl}_3$ , 100 MHz):  $\delta$  200.9, 160.2, 140.5, 138.1, 137.9, 137.4, 135.6, 131.5, 130.0, 128.8, 128.7, 128.3, 126.4, 123.2, 77.5, 27.8, 21.5 (two signals missing due to overlap); HRMS (ESI)  $m/z$ : [M+H]<sup>+</sup> Calcd for  $\text{C}_{21}\text{H}_{19}\text{BrNOS}$  412.0365, Found: 412.0367.

### 1-(6-bromopyridin-2-yl)-1-phenyl-1-(*p*-tolylthio)propan-2-one (3ca)

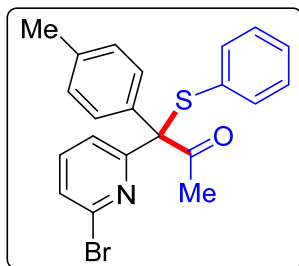

The title compound was isolated by column chromatography (eluent: EtOAc/ petroleum ether = 1/50) as a pale yellow solid in 94% yield (77.7 mg); M.p.: 126-128 °C;  $^1\text{H NMR}$  ( $\text{CDCl}_3$ , 400 MHz):  $\delta$  7.48 (d,  $J$  = 8.2 Hz, 2H), 7.35 (t,  $J$  = 7.8 Hz, 1H), 7.28 (d,  $J$  = 7.8 Hz, 1H), 7.21-7.14 (m, 3H), 7.10-7.04 (m, 5H), 2.35 (s, 3H), 2.16 (s, 3H);  $^{13}\text{C}\{^1\text{H}\}$  NMR ( $\text{CDCl}_3$ , 100 MHz):  $\delta$  200.9, 160.3, 140.5, 137.9, 135.5, 134.4, 131.6, 129.3, 129.1, 128.7, 128.3, 126.3, 123.0, 77.3, 27.7, 21.0 (one signals missing due to overlap); HRMS (ESI)  $m/z$ : [M+H]<sup>+</sup> Calcd for  $\text{C}_{21}\text{H}_{19}\text{BrNOS}$  412.0365, Found: 412.0366.

### 1-(6-bromopyridin-2-yl)-1-((4-methoxyphenyl)thio)-1-phenylpropan-2-one (3da)

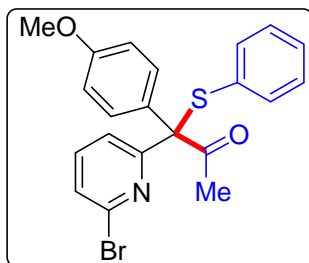

The title compound was isolated by column chromatography (eluent: EtOAc/ petroleum ether = 1/20) as a pale yellow solid in 98% yield (84.6 mg); M.p.: 169-171 °C;  $^1\text{H NMR}$  ( $\text{CDCl}_3$ , 400 MHz):  $\delta$  7.50 (d,  $J$  = 8.8 Hz, 2H), 7.36 (t,  $J$  = 7.8 Hz, 1H), 7.29 (d,  $J$  = 7.7 Hz, 1H), 7.20 (t,  $J$  = 7.0 Hz, 1H), 7.10-7.03 (m, 5H), 6.86 (d,  $J$  = 8.8 Hz, 2H), 3.81 (s, 3H), 2.16 (s, 3H);  $^{13}\text{C}\{^1\text{H}\}$  NMR ( $\text{CDCl}_3$ , 100 MHz):  $\delta$  200.8, 160.3, 159.1, 140.5, 138.0, 135.5, 131.5, 130.7, 129.2, 128.7, 128.3, 126.4, 122.9, 113.7, 76.9, 55.2, 27.6; HRMS (ESI)  $m/z$ : [M+H]<sup>+</sup> Calcd for  $\text{C}_{21}\text{H}_{19}\text{BrNO}_2\text{S}$  428.0314, Found: 428.0323.

### 1-(6-bromopyridin-2-yl)-1-phenyl-1-((4-(trifluoromethoxy)phenyl)thio)propan-2-one (3ea)

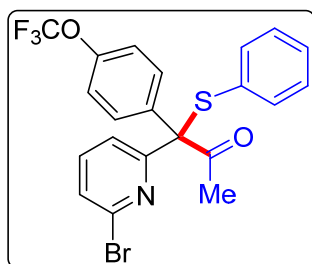

The title compound was isolated by column chromatography (eluent: EtOAc/ petroleum ether = 1/50) as a yellow solid in 92% yield (88.4 mg); M.p.: 141-143 °C;  $^1\text{H NMR}$  ( $\text{CDCl}_3$ , 400 MHz):  $\delta$  7.55 (d,  $J$  = 8.9 Hz, 2H), 7.46 (t,  $J$  = 7.8 Hz, 1H), 7.37 (d,  $J$  = 7.8 Hz, 1H), 7.25-7.21 (m, 2H), 7.14-7.09 (m, 4H), 7.04 (d,  $J$  = 7.2 Hz, 2H),

2.22 (s, 3H);  $^{13}\text{C}\{^1\text{H}\}$  NMR ( $\text{CDCl}_3$ , 100 MHz):  $\delta$  200.1, 159.9, 148.5, 140.9, 138.5, 136.6, 135.3, 131.3, 130.9, 129.1, 128.6, 126.9, 122.7, 120.34 (q,  $J_{\text{C-F}}$  = 257.6 Hz), 120.28, 75.7, 27.8;  $^{19}\text{F}$  NMR ( $\text{CDCl}_3$ , 376 MHz):  $\delta$  -57.7 (s); HRMS (ESI)  $m/z$ :  $[\text{M}+\text{H}]^+$  Calcd for  $\text{C}_{21}\text{H}_{16}\text{BrF}_3\text{NO}_2\text{S}$  482.0032, Found: 482.0036.

### 1-(6-bromopyridin-2-yl)-1-phenyl-1-((4-(trifluoromethyl)phenyl)thio)propan-2-one (3fa)

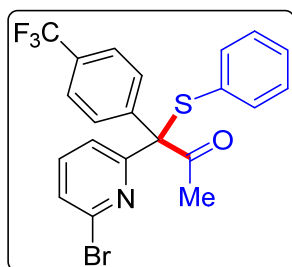

The title compound was isolated by column chromatography (eluent: EtOAc/ petroleum ether = 1/50) as a yellow oil in 91% yield (84.3 mg);  $^1\text{H NMR}$  ( $\text{CDCl}_3$ , 400 MHz):  $\delta$  7.68 (d,  $J$  = 8.3 Hz, 2H), 7.55 (d,  $J$  = 8.4 Hz, 2H), 7.47 (t,  $J$  = 7.8 Hz, 1H), 7.38 (d,  $J$  = 7.8 Hz, 1H), 7.23 (d,  $J$  = 7.4 Hz, 2H), 7.12 (t,  $J$  = 7.8 Hz, 2H), 7.05 (d,  $J$  = 7.5 Hz,

2H), 2.24 (s, 3H);  $^{13}\text{C}\{^1\text{H}\}$  NMR ( $\text{CDCl}_3$ , 100 MHz):  $\delta$  199.7, 159.6, 142.0, 141.0, 138.6, 135.1, 130.7, 130.1, 129.7 (d,  $J_{\text{C-F}}$  = 32.7 Hz), 129.1, 128.7, 127.1, 125.0 (q,  $J_{\text{C-F}}$  = 3.6 Hz), 123.9 (d,  $J_{\text{C-F}}$  = 272.3 Hz), 122.7, 75.9, 27.8;  $^{19}\text{F}$  NMR ( $\text{CDCl}_3$ , 376 MHz):  $\delta$  -62.6 (s); HRMS (ESI)  $m/z$ :  $[\text{M}+\text{H}]^+$  Calcd for  $\text{C}_{21}\text{H}_{16}\text{BrF}_3\text{NOS}$  466.0083, Found: 466.0089.

### 1-(6-bromopyridin-2-yl)-1-((4-fluorophenyl)thio)-1-phenylpropan-2-one (3ga)

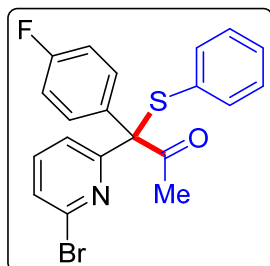

The title compound was isolated by column chromatography (eluent: EtOAc/ petroleum ether = 1/50) as a pale yellow solid in 97% yield (80.5 mg); M.p.: 141-143 °C;  $^1\text{H NMR}$  ( $\text{CDCl}_3$ , 400 MHz):  $\delta$  7.55-7.52 (m, 2H), 7.42 (t,  $J$  = 7.8 Hz, 1H), 7.34 (d,  $J$  = 7.8 Hz, 1H), 7.22 (t,  $J$  = 7.3 Hz, 1H), 7.14-7.09 (m, 3H), 7.05-6.98 (m, 4H), 2.19 (s, 3H);  $^{13}\text{C}\{^1\text{H}\}$

NMR ( $\text{CDCl}_3$ , 100 MHz):  $\delta$  200.3, 162.1 (d,  $J_{\text{C-F}}$  = 248.7 Hz), 160.1, 140.8, 138.3, 135.4, 133.6 (d,  $J_{\text{C-F}}$  = 3.4 Hz), 131.5 (d,  $J_{\text{C-F}}$  = 8.1 Hz), 131.1, 129.0, 128.5, 126.7, 122.7, 115.1 (d,  $J_{\text{C-F}}$  = 21.4

Hz), 76.0, 27.7; **<sup>19</sup>F NMR (CDCl<sub>3</sub>, 376 MHz):** δ -102.0 (s); **HRMS (ESI) m/z:** [M+H]<sup>+</sup> Calcd for C<sub>20</sub>H<sub>16</sub>BrFNOS 416.0115, Found: 416.0124.

### 1-(6-bromopyridin-2-yl)-1-((4-chlorophenyl)thio)-1-phenylpropan-2-one (3ha)

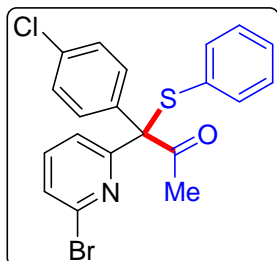

The title compound was isolated by column chromatography (eluent: EtOAc/ petroleum ether = 1/50) as a pale yellow solid in 71% yield (61.7 mg); M.p.: 127-129 °C; **<sup>1</sup>H NMR (CDCl<sub>3</sub>, 400 MHz):** δ 7.51 (d, *J* = 8.6 Hz, 2H), 7.42 (t, *J* = 7.8 Hz, 1H), 7.34 (d, *J* = 7.8 Hz, 1H), 7.28 (d, *J* = 8.6 Hz, 2H), 7.23 (t, *J* = 7.3 Hz, 1H), 7.14-7.09 (m, 3H), 7.04 (d, *J* = 7.4 Hz, 2H), 2.20 (s, 3H); **<sup>13</sup>C{<sup>1</sup>H} NMR (CDCl<sub>3</sub>, 100 MHz):** δ 200.0, 159.9, 140.8, 138.4, 136.4, 135.3, 133.9, 131.1, 130.9, 129.0, 128.6, 128.3, 126.8, 122.7, 76.0, 27.7; **HRMS (ESI) m/z:** [M+H]<sup>+</sup> Calcd for C<sub>20</sub>H<sub>16</sub>BrClNOS 431.9819, Found: 431.9816.

### (1*R*,2*R*,5*S*)-2-isopropyl-5-methylcyclohexyl-4-(1-(6-bromopyridin-2-yl)-2-oxo-1-(phenylthio)propyl)benzoate (3ia)

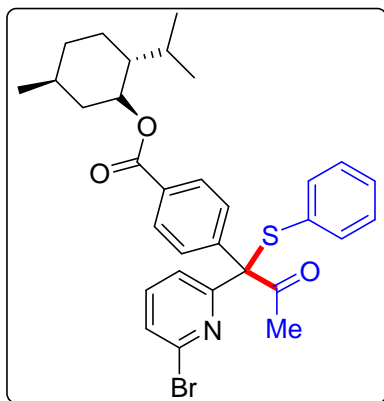

The title compound was isolated by column chromatography (eluent: EtOAc/ petroleum ether = 1/50) as a yellow oil in 96% yield (112.0 mg, mixture of two diastereoisomers, *d.r.* = 1:1); **<sup>1</sup>H NMR (CDCl<sub>3</sub>, 400 MHz):** δ 7.98 (d, *J* = 8.6 Hz, 2H), 7.68-7.64 (m, 2H), 7.42 (td, *J* = 7.8, 2.2 Hz, 1H), 7.34 (d, *J* = 7.9 Hz, 1H), 7.24-7.19 (m, 1H), 7.16-7.03 (m, 5H), 4.96-4.89 (m, 1H), 2.21+2.20 (s+s, 3H), 2.12-2.09 (m, 1H), 1.98-1.91 (m, 1H), 1.74-1.71 (m, 2H), 1.57-1.51 (m, 2H), 1.14-1.07 (m, 2H), 0.93-0.90 (m, 7H), 0.80-0.78 (s+s, 3H); **<sup>13</sup>C{<sup>1</sup>H} NMR (CDCl<sub>3</sub>, 100 MHz):** δ 199.9, 199.8, 165.5, 159.7, 159.6, 142.6, 142.5, 140.8, 138.4, 138.3, 135.2, 135.1, 130.9, 130.8, 130.14, 130.11, 129.6, 129.3, 129.0, 128.56, 128.55, 126.8, 122.8, 122.7, 76.6, 76.4, 74.9, 47.12, 47.10, 40.8, 34.2, 31.3, 27.83, 27.79, 26.3, 23.5, 22.0, 20.7, 16.40, 16.39 (14 signals missing due to overlap); **HRMS (ESI) m/z:** [M+H]<sup>+</sup> Calcd for C<sub>31</sub>H<sub>35</sub>BrNO<sub>3</sub>S 580.1516, Found: 580.1520.

### 1-(benzofuran-7-yl)-1-(6-bromopyridin-2-yl)-1-(phenylthio)propan-2-one (3ja)

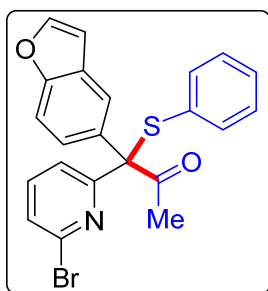

The title compound was isolated by column chromatography (eluent: EtOAc/ petroleum ether = 1/50) as a white solid in 71% yield (62.7 mg); M.p.: 127-129 °C;  $^1\text{H NMR}$  ( $\text{CDCl}_3$ , 400 MHz):  $\delta$  7.87 (s, 1H), 7.64 (s, 1H), 7.54 (d,  $J$  = 8.8 Hz, 1H), 7.47 (d,  $J$  = 8.8 Hz, 1H), 7.38 (t,  $J$  = 7.7 Hz, 1H), 7.31 (d,  $J$  = 7.8 Hz, 1H), 7.20-7.17 (m, 1H), 7.11 (d,  $J$  = 7.7 Hz, 1H), 7.06 (d,  $J$  = 4.0 Hz, 4H), 6.74 (s, 1H), 2.18 (s, 3H);  $^{13}\text{C}\{^1\text{H}\}$  NMR ( $\text{DMSO}-d_6$ , 100 MHz):  $\delta$  199.8, 159.8, 153.5, 146.7, 139.6, 139.5, 135.1, 131.7, 131.0, 128.9, 128.4, 127.2, 126.7, 125.6, 123.4, 122.2, 111.2, 107.0, 76.9, 27.4; HRMS (ESI)  $m/z$ :  $[\text{M}+\text{H}]^+$  Calcd for  $\text{C}_{22}\text{H}_{17}\text{BrNO}_2\text{S}$  438.0158, Found: 438.0164.

### 1-(6-bromopyridin-2-yl)-1-((4-chlorophenyl)thio)-1-(thiophen-2-yl)propan-2-one (3ka)

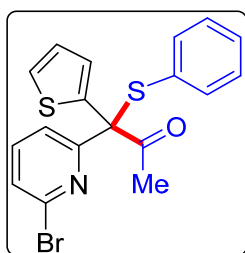

The title compound was isolated by column chromatography (eluent: EtOAc/ petroleum ether = 1/50) as an orange solid in 50% yield (40.3 mg); M.p.: 102-104 °C;  $^1\text{H NMR}$  ( $\text{CDCl}_3$ , 400 MHz):  $\delta$  7.46 (t,  $J$  = 7.8 Hz, 1H), 7.40 (d,  $J$  = 7.8 Hz, 1H), 7.27-7.22 (m, 3H), 7.13 (t,  $J$  = 7.7 Hz, 2H), 7.06-7.03 (m, 3H), 6.96-6.93 (m, 1H), 2.20 (s, 3H);  $^{13}\text{C}\{^1\text{H}\}$  NMR ( $\text{CDCl}_3$ , 100 MHz):  $\delta$  199.0, 159.9, 141.3, 140.9, 138.6, 136.2, 130.5, 129.4, 129.3, 128.5, 127.3, 127.2, 126.3, 122.2, 72.7, 26.7; HRMS (ESI)  $m/z$ :  $[\text{M}+\text{H}]^+$  Calcd for  $\text{C}_{18}\text{H}_{15}\text{BrClNOS}_2$  403.9773, Found: 403.9765.

### 1-(6-chloropyridin-2-yl)-1-phenyl-1-(phenylthio)propan-2-one (3la)

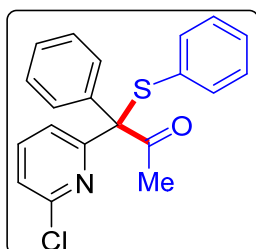

The title compound was isolated by column chromatography (eluent: EtOAc/ petroleum ether = 1/50 to EtOAc/ petroleum ether = 1/20) as a white solid in 88% yield (62.2 mg); M.p.: 149-151 °C;  $^1\text{H NMR}$  ( $\text{CDCl}_3$ , 400 MHz):  $\delta$  7.59 (d,  $J$  = 7.3 Hz, 2H), 7.48 (t,  $J$  = 7.8 Hz, 1H), 7.36-7.30 (m, 3H), 7.20 (t,  $J$  = 6.6 Hz, 1H), 7.15 (d,  $J$  = 7.9 Hz, 1H), 7.10-7.05 (m, 5H), 2.18 (s, 3H);  $^{13}\text{C}\{^1\text{H}\}$  NMR ( $\text{CDCl}_3$ , 100 MHz):  $\delta$  200.7, 159.8, 150.2, 138.3, 137.7, 135.5, 131.5, 129.6, 128.8, 128.4, 128.0, 122.8, 122.7, 77.2, 27.9 (one signal missing due to overlap); HRMS (ESI)  $m/z$ :  $[\text{M}+\text{H}]^+$  Calcd for  $\text{C}_{20}\text{H}_{17}\text{ClNOS}$  354.0714, Found: 354.0722.

### 1-(6-iodopyridin-2-yl)-1-phenyl-1-(phenylthio)propan-2-one (3ma)

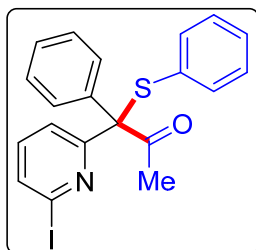

The title compound was isolated by column chromatography (eluent: EtOAc/ petroleum ether = 1/50 to EtOAc/ petroleum ether = 1/20) as a white solid in 84% yield (74.8 mg); M.p.: 135-137 °C; **<sup>1</sup>H NMR (CDCl<sub>3</sub>, 400 MHz):** δ 7.59-7.57 (m, 2H), 7.53 (dd, *J* = 7.6, 0.8 Hz, 1H), 7.37-7.30 (m, 3H), 7.21-7.17 (m, 1H), 7.14 (d, *J* = 7.7 Hz, 1H), 7.10-7.05 (m, 5H), 2.16 (s, 3H); **<sup>13</sup>C{<sup>1</sup>H} NMR (CDCl<sub>3</sub>, 100 MHz):** δ 200.8, 160.7, 137.6, 137.1, 135.5, 133.2, 131.5, 129.4, 128.7, 128.4, 128.3, 128.0, 123.5, 116.0, 77.4, 27.7; **HRMS (ESI) m/z:** [M+Na]<sup>+</sup> Calcd for C<sub>20</sub>H<sub>16</sub>INNaOS 467.9889, Found: 467.9893.

### methyl 6-(2-oxo-1-phenyl-1-(phenylthio)propyl)picolinate (3na)

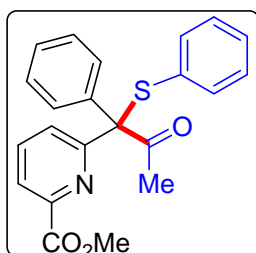

The title compound was isolated by column chromatography (eluent: EtOAc/ petroleum ether = 1/20 to DCM/ EtOAc = 1/10) as colorless oil in 81% yield (60.9 mg); **<sup>1</sup>H NMR (CDCl<sub>3</sub>, 400 MHz):** δ 7.94 (d, *J* = 7.7 Hz, 1H), 7.65 (t, *J* = 7.9 Hz, 1H), 7.57 (dd, *J* = 7.8, 1.6 Hz, 2H), 7.35-7.30 (m, 3H), 7.23 (d, *J* = 8.0 Hz, 1H), 7.19-7.13 (m, 1H), 7.07-7.02 (m, 4H), 3.94 (s, 3H), 2.21 (s, 3H); **<sup>13</sup>C{<sup>1</sup>H} NMR (CDCl<sub>3</sub>, 100 MHz):** δ 201.3, 165.5, 159.4, 147.1, 137.9, 136.7, 135.4, 131.8, 129.5, 128.6, 128.41, 128.35, 128.0, 127.5, 123.4, 77.8, 52.7, 28.1; **HRMS (ESI) m/z:** [M+Na]<sup>+</sup> Calcd for C<sub>22</sub>H<sub>19</sub>NNaO<sub>3</sub>S 400.0978, Found: 400.0982.

## Scale up preparation of 3aa

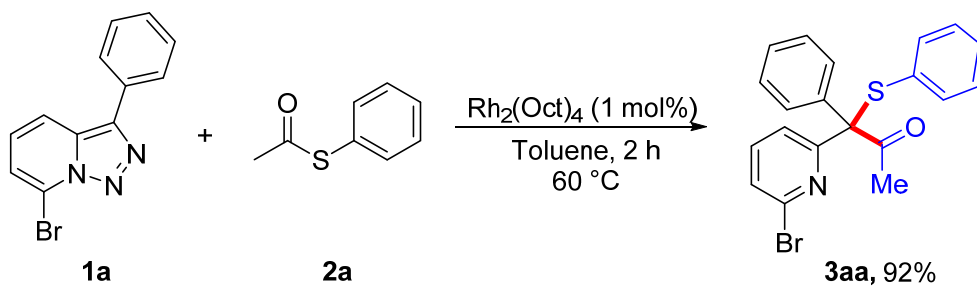

A mixture of pyridotriazole **1a** (4.0 mmol, 2.0 equiv),  $\text{Rh}_2(\text{Oct})_4$  (0.02 mmol, 1.0 mol %) were weighted in a Schlenk tube equipped with a stir bar. Thioester **2a** (2.0 mmol, 1.0 equiv) and dry Toluene (20 mL) was added and the mixture was stirred at 60 °C for 2 h using heating modular of parallel reactor under Ar atmosphere. Afterwards, the reaction was cooled to room temperature and transferred to a 100 mL round-bottomed flask using  $\text{CH}_2\text{Cl}_2$ . Silica was added to the flask and volatiles were evaporated under reduced pressure. The purification was performed by flash column chromatography on silica gel. The desired product **3aa** was obtained in 92% isolated yield (731.1 mg).



## Intermolecular competition reaction

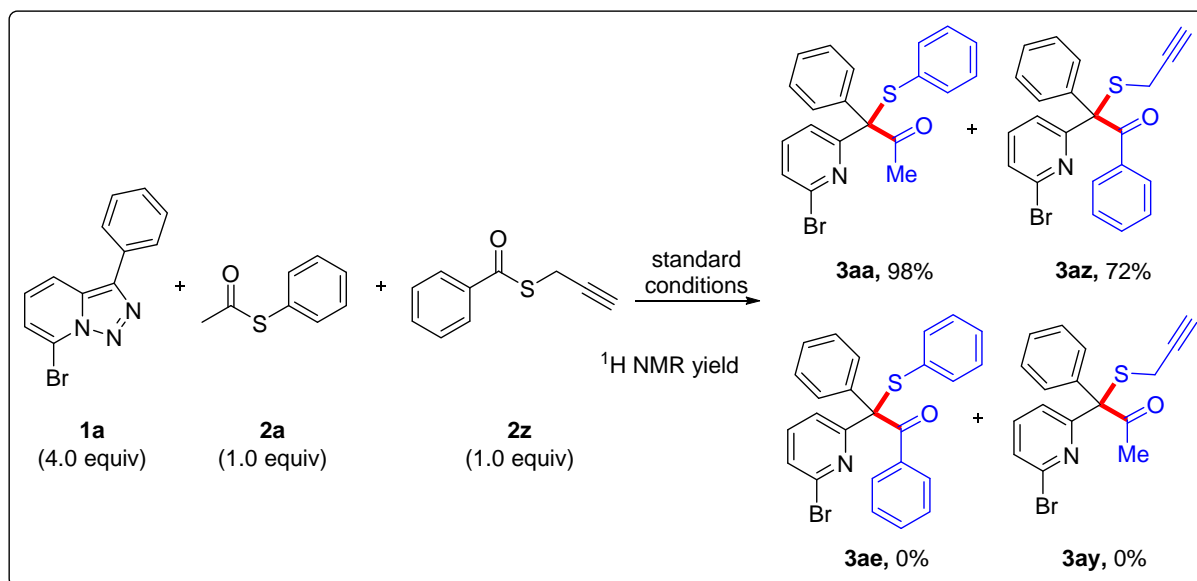

A mixture of pyridotriazoles (**1a**) (0.4 mmol, 4.0 equiv),  $\text{Rh}_2(\text{Oct})_4$  (0.002 mmol, 2.0 mol %) were weighed in a Schlenk tube equipped with a stir bar. Thioesters (**2a**) (0.1 mmol, 1.0 equiv), **2z** (0.1 mmol, 1.0 equiv) and dry Toluene (2.0 mL) were added and the mixture was stirred at 60 °C for 2 h using heating modular of parallel reactor under Ar atmosphere. Afterwards, the reaction was cooled to room temperature and transferred to a 100 mL round-bottomed flask using  $\text{CH}_2\text{Cl}_2$ . Solvent was evaporated under reduced pressure. Only the corresponding products **3aa** and **3az** were observed from the  $^1\text{H}$  NMR of crude reaction mixture, and cross-over products **3ae** and **3ay** were not detected. The yield of **3aa** (98%) and **3az** (73%) were determined by integration of  $^1\text{H}$  NMR using 1,1,2,2-tetrachloroethane as an internal standard.

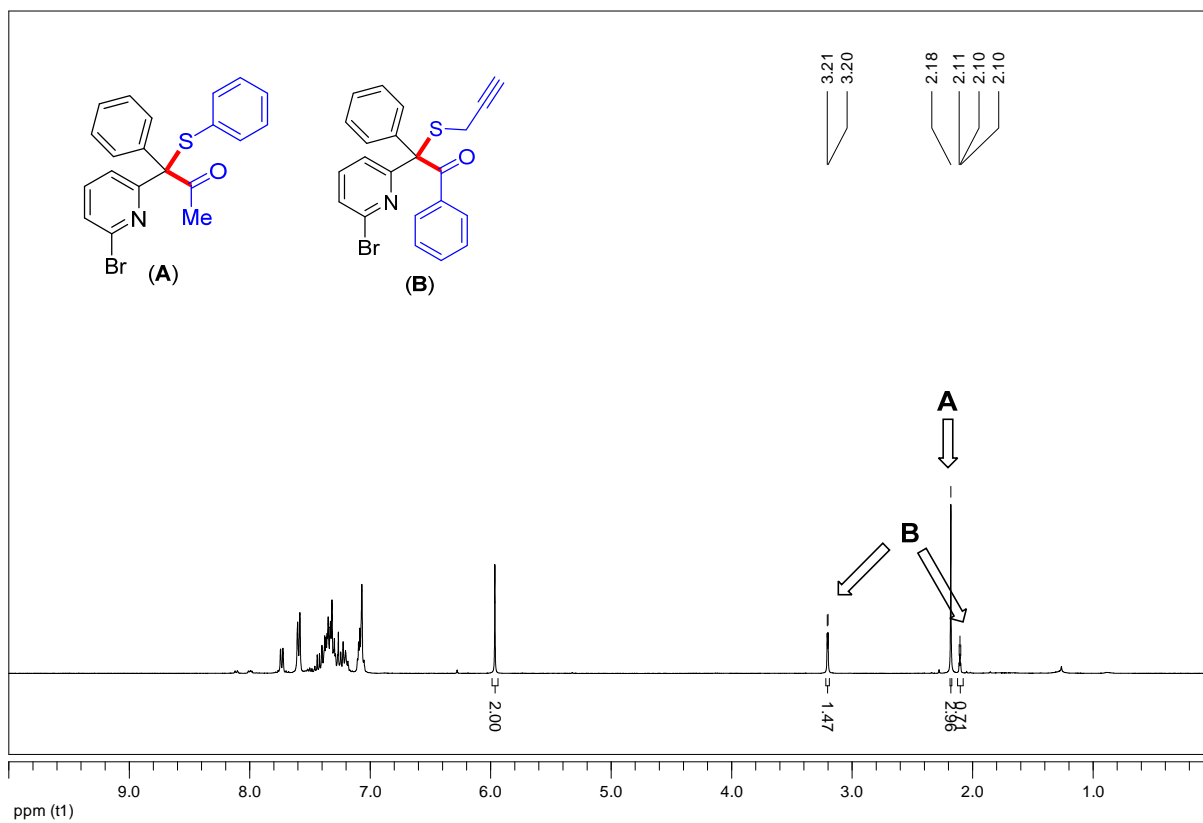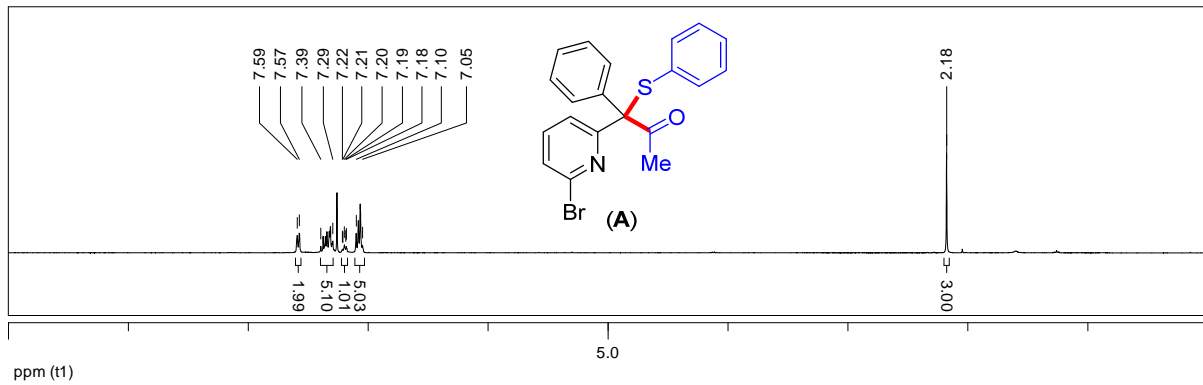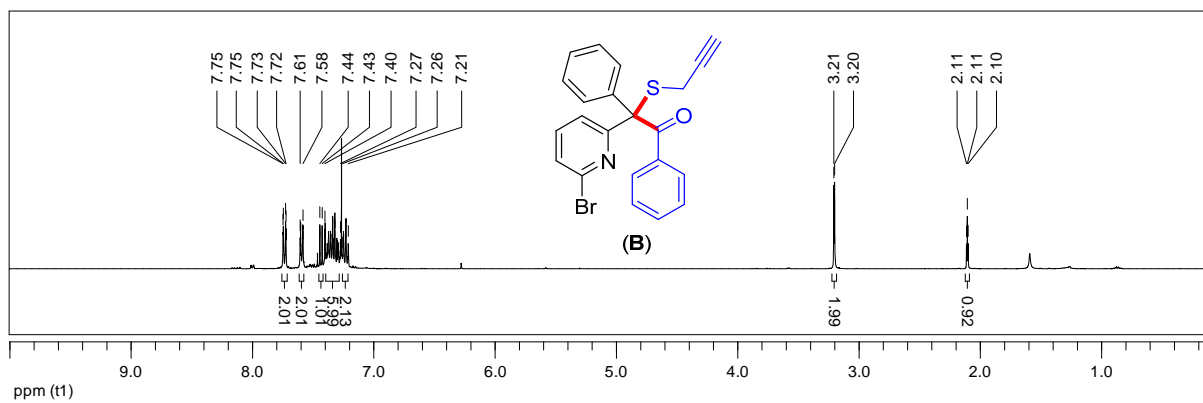

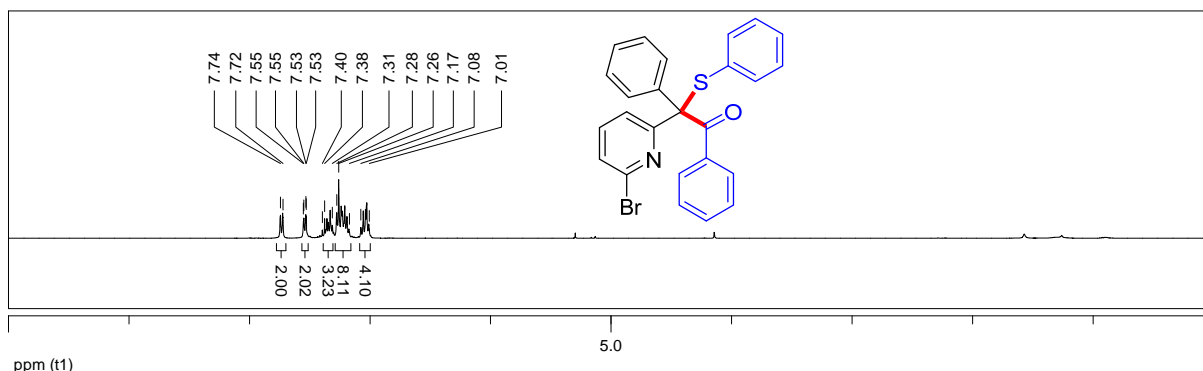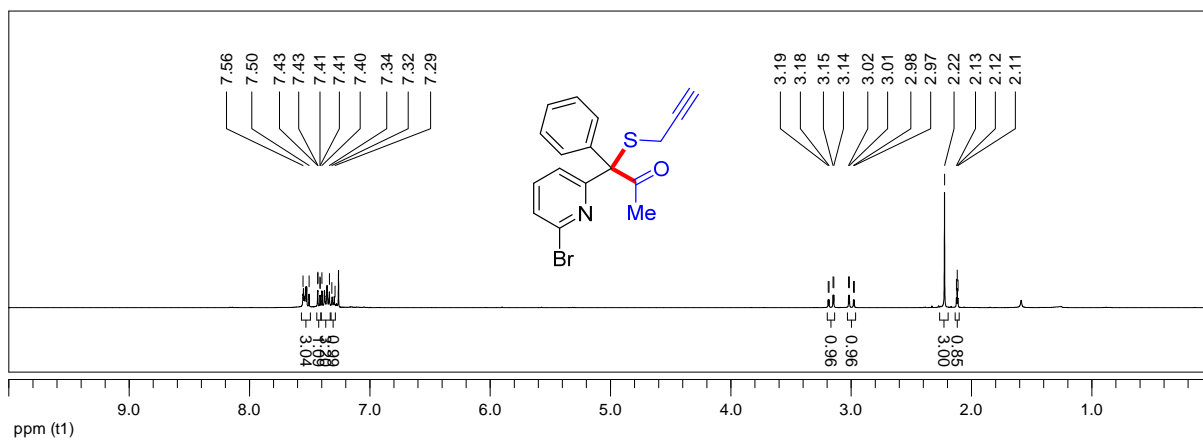

## Oxidation reaction of 3aa

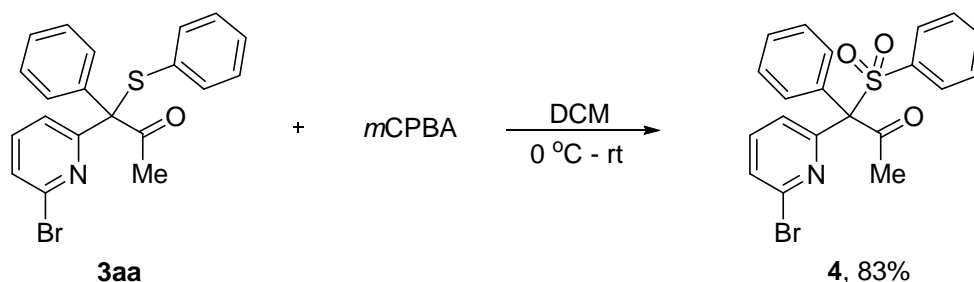

**3aa** (0.2 mmol, 1.0 equiv) was weighed in a round bottom flask equipped with a stir bar and dry dichloromethane (1.0 mL) was added. Then *m*CPBA (1.2 mmol, 6.0 equiv) solution in dichloromethane (1.5 mL) was added dropwise at 0 °C. The mixture was stirred at room temperature overnight. Afterwards, sodium hydroxide solution was added to neutralize the system and extracted by CH<sub>2</sub>Cl<sub>2</sub>. Drying by Anhydrous magnesium sulfate. Silica was added to the flask and volatiles were evaporated under reduced pressure. The purification was performed by flash column chromatography on silica gel.

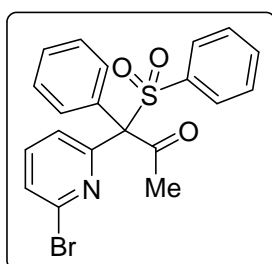

The title compound was isolated by column chromatography (eluent: EtOAc/ petroleum ether = 1/50 to EtOAc/ petroleum ether = 1/20) as a white solid in 83% yield (71.3 mg); M.p.: 221-223 °C; **<sup>1</sup>H NMR (CDCl<sub>3</sub>, 400 MHz):** δ 7.89 (d, *J* = 7.7 Hz, 2H), 7.68-7.64 (m, 1H), 7.58-7.57 (m, 4H), 7.48-7.35 (m, 5H), 7.28-7.24 (m, 2H), 2.04 (s, 3H);

**<sup>13</sup>C{<sup>1</sup>H} NMR (CDCl<sub>3</sub>, 100 MHz):** δ 198.8, 154.1, 140.8, 138.6, 137.7, 133.4, 131.3, 131.0, 130.5, 129.5, 128.6, 128.3, 127.7, 125.9, 91.1, 29.6; **HRMS (ESI):** [M+H]<sup>+</sup> Calcd for C<sub>20</sub>H<sub>17</sub>BrNO<sub>3</sub>S<sup>+</sup> 430.0107, Found: 430.0104.

## Asymmetric synthesis

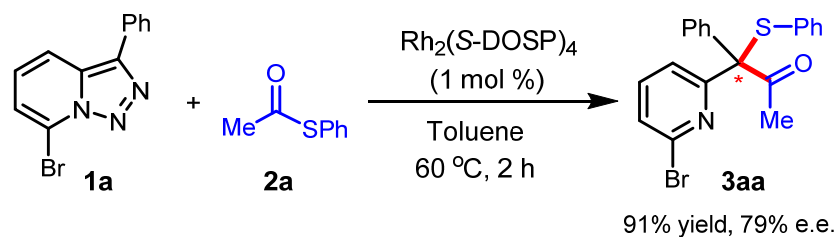

$\text{Rh}_2(\text{S-DOSP})_4$ : dirhodium(II) tetrakis[(*S*)-*N*-(*p*-dodecylphenylsulfonyl)prolinate]

A mixture of pyridotriazole **1a** (0.4 mmol, 2.0 equiv),  $\text{Rh}_2(\text{S-DOSP})_4$  (0.002 mmol, 1.0 mol %) were weighted in a Schlenk tube equipped with a stir bar. Thioester **2a** (0.2 mmol, 1.0 equiv) and dry Toluene (2 mL) was added and the mixture was stirred at 60 °C for 2 h using heating modular of parallel reactor under Ar atmosphere. Afterwards, the reaction was cooled to room temperature and transferred to a 100 mL round-bottomed flask using  $\text{CH}_2\text{Cl}_2$ . Silica was added to the flask and volatiles were evaporated under reduced pressure. The purification was performed by flash column chromatography on silica gel. The desired product **3aa** was obtained in 91% isolated yield (72.5 mg).

The enantiomeric excess of **3aa** was determined by HPLC with a Chiralpak OD-H column, n-hexane/2-propanol= 90:10, flow rate= 1 mL/min, 254 nm UV detector.

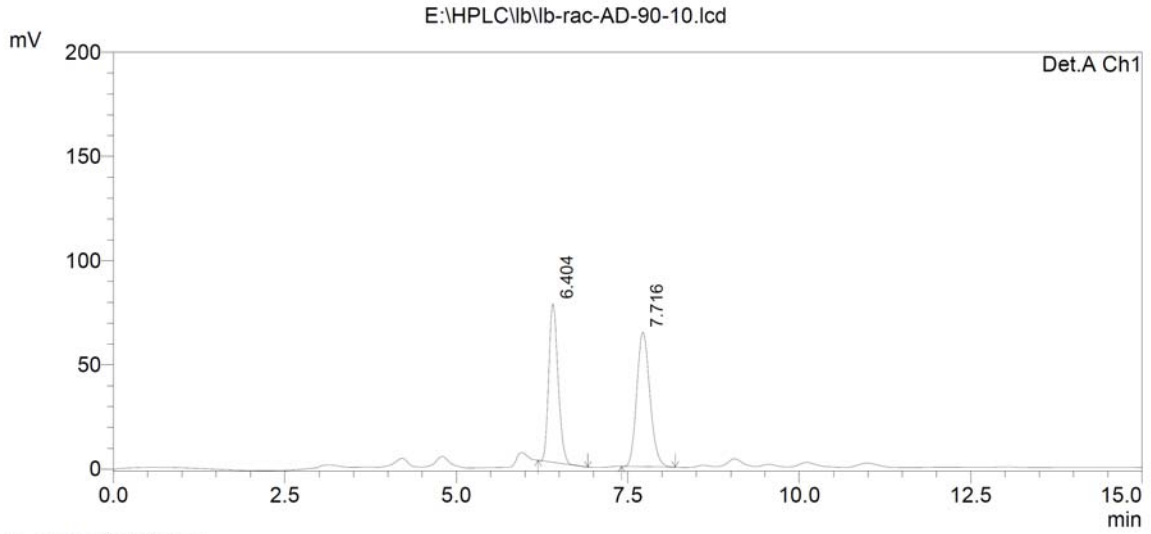

PeakTable

| Peak# | Ret. Time | Area    | Height | Area %  | Height % |
|-------|-----------|---------|--------|---------|----------|
| 1     | 6.404     | 716602  | 76101  | 45.396  | 54.128   |
| 2     | 7.716     | 861955  | 64493  | 54.604  | 45.872   |
| Total |           | 1578557 | 140595 | 100.000 | 100.000  |

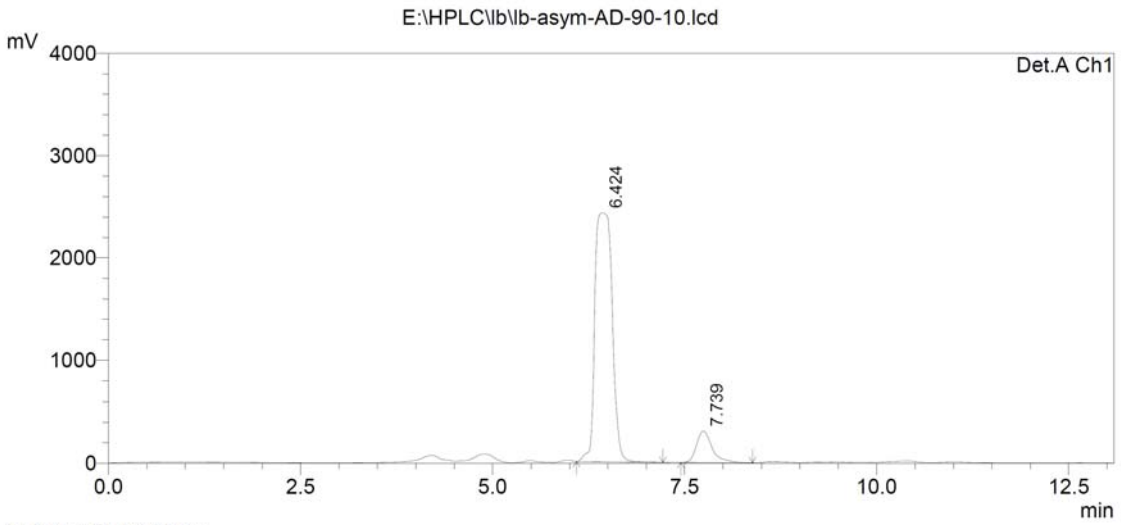

PeakTable

| Peak# | Ret. Time | Area     | Height  | Area %  | Height % |
|-------|-----------|----------|---------|---------|----------|
| 1     | 6.424     | 38007036 | 2427823 | 89.762  | 88.734   |
| 2     | 7.739     | 4334929  | 308254  | 10.238  | 11.266   |
| Total |           | 42341965 | 2736078 | 100.000 | 100.000  |

# **Spectral Copies of $^1\text{H}$ , $^{13}\text{C}$ , and $^{19}\text{F}$ NMR of Compounds Obtained in this Study**

# 1-(6-bromopyridin-2-yl)-1-phenyl-1-(phenylthio)propan-2-one (3aa)

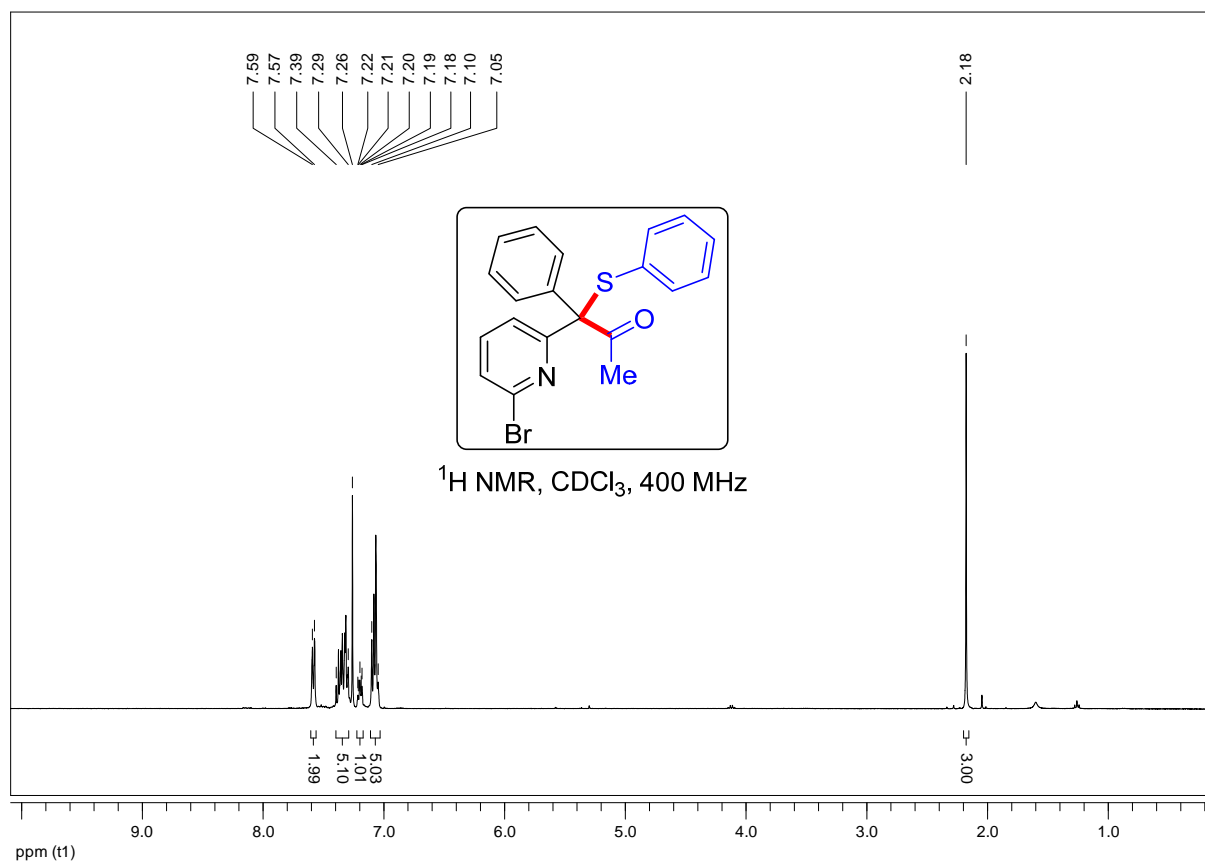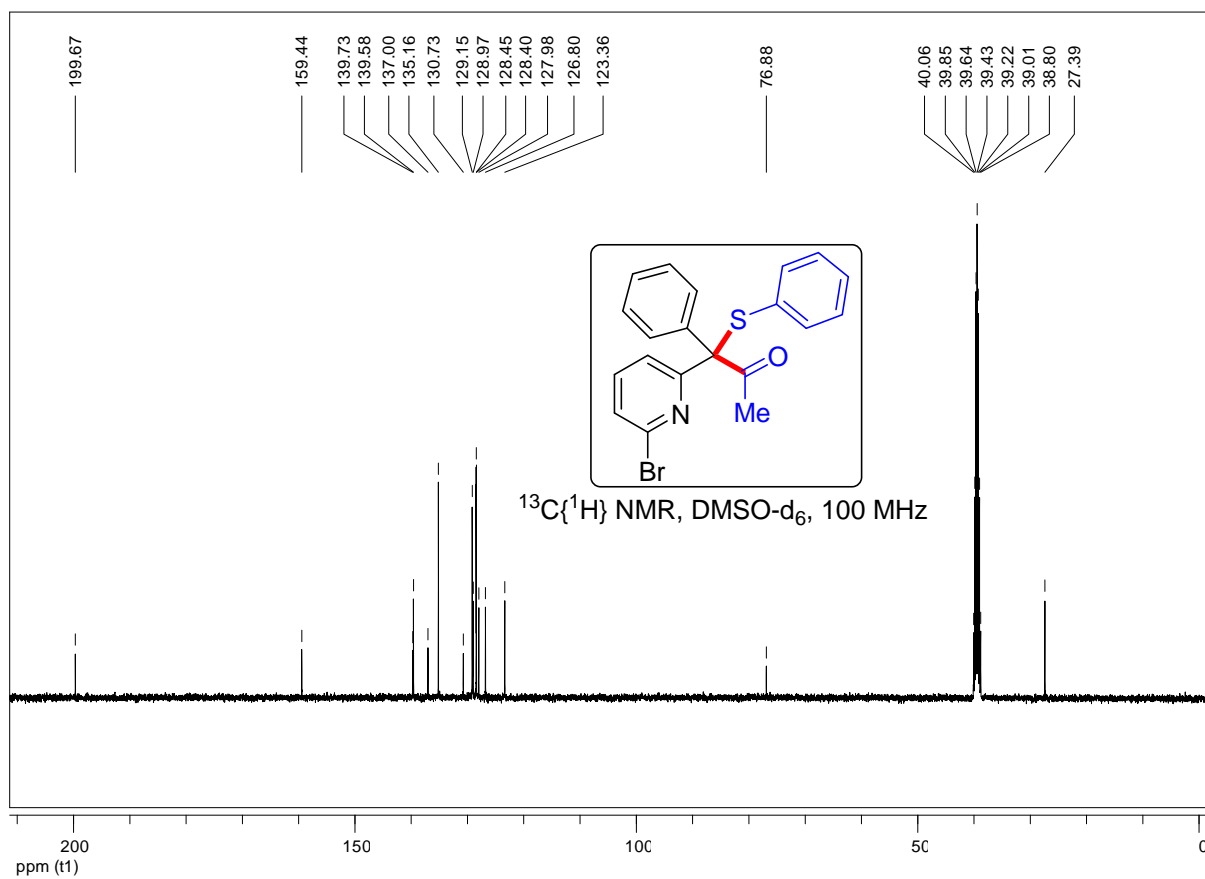



# 1-(6-bromopyridin-2-yl)-1-phenyl-1-(phenylthio)pentan-2-one (3ab)

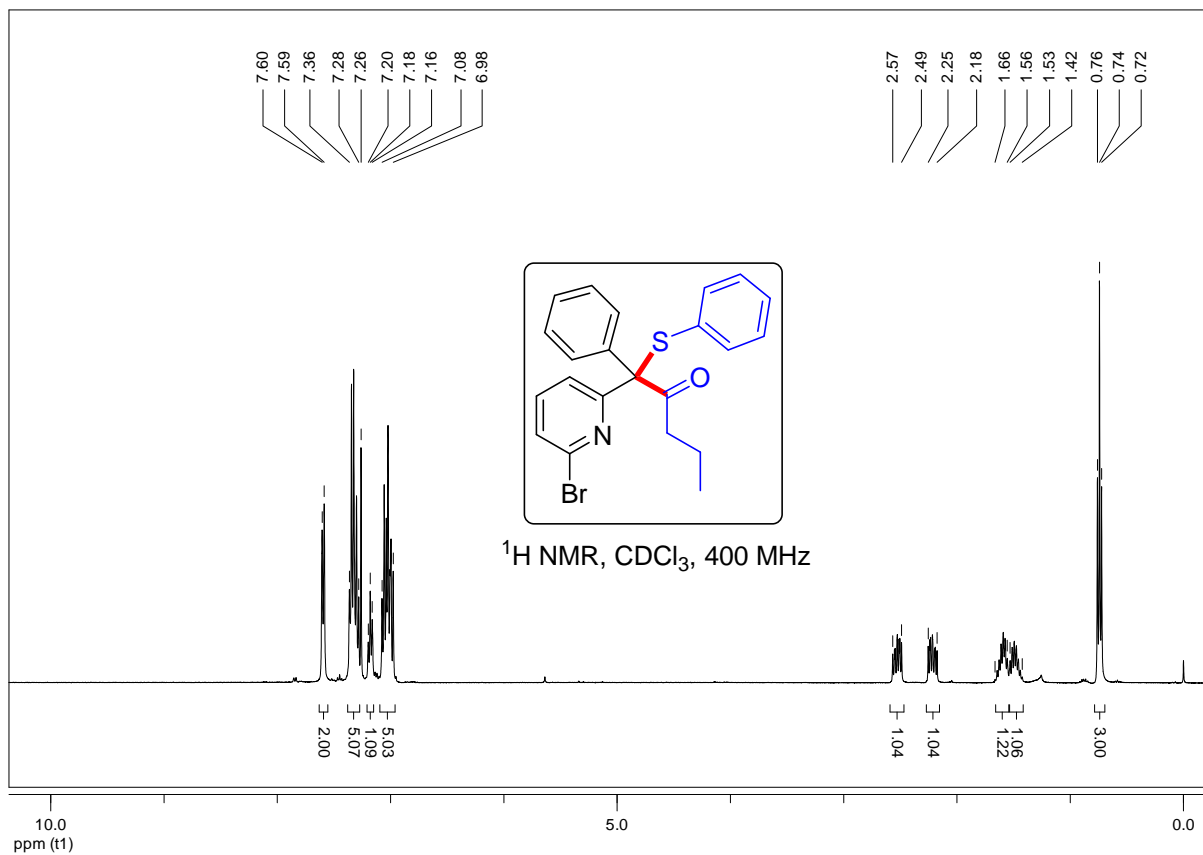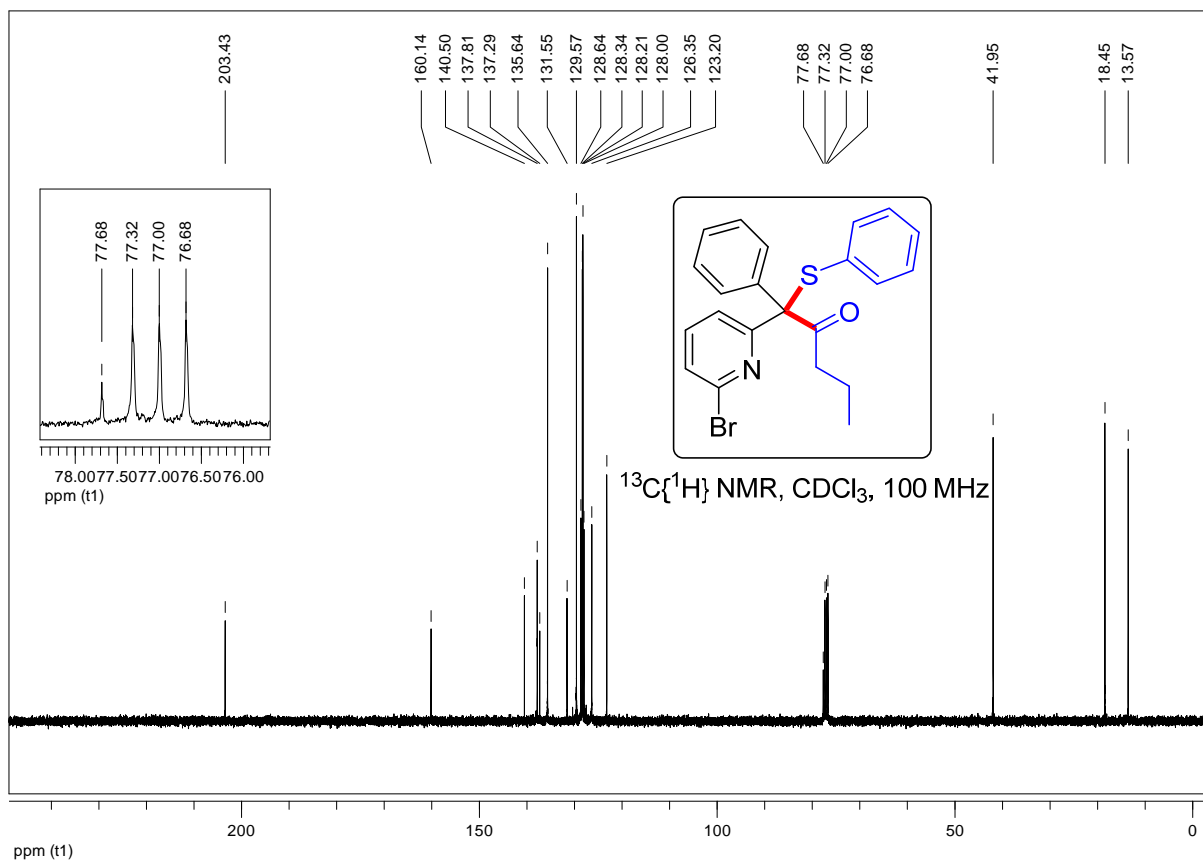

# 1-(6-bromopyridin-2-yl)-1,3-diphenyl-1-(phenylthio)propan-2-one (3ac)

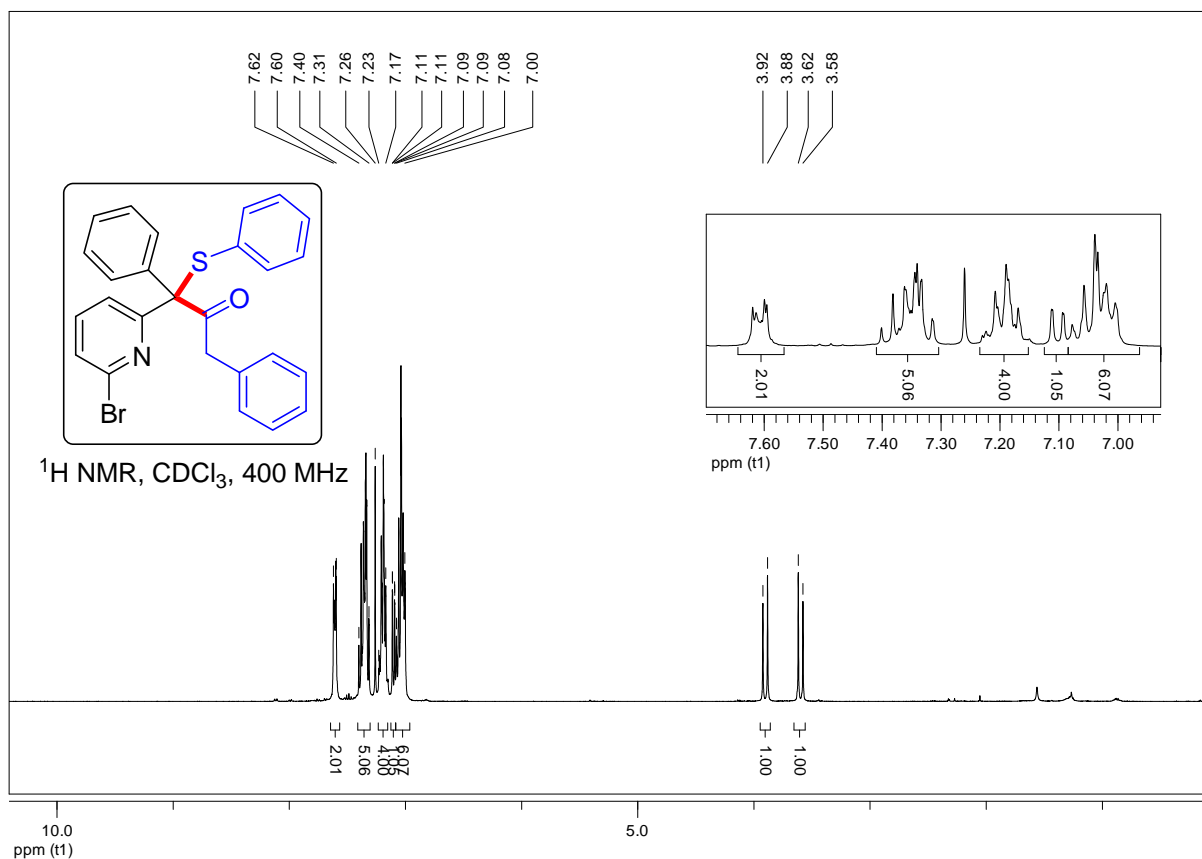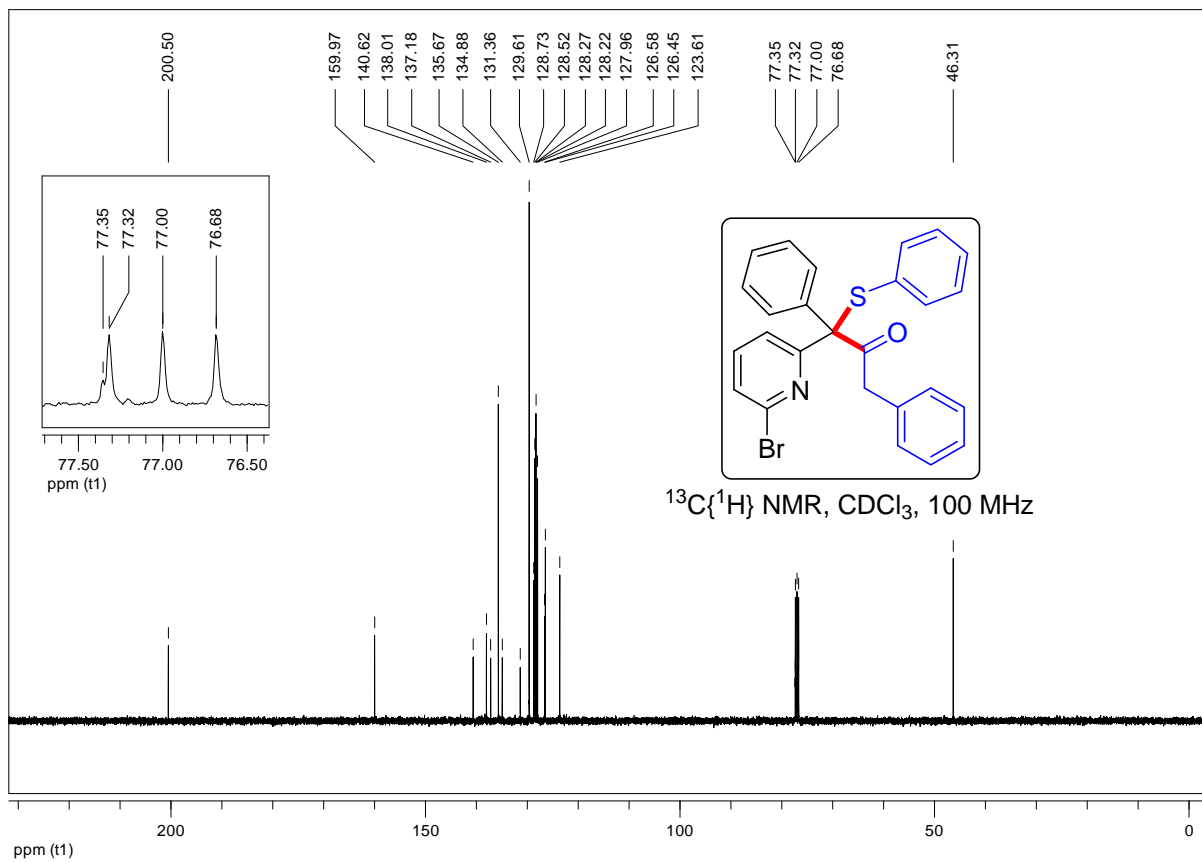

**(E)-1-(6-bromopyridin-2-yl)-1,4-diphenyl-1-(phenylthio)but-3-en-2-one**

**(3ad)**

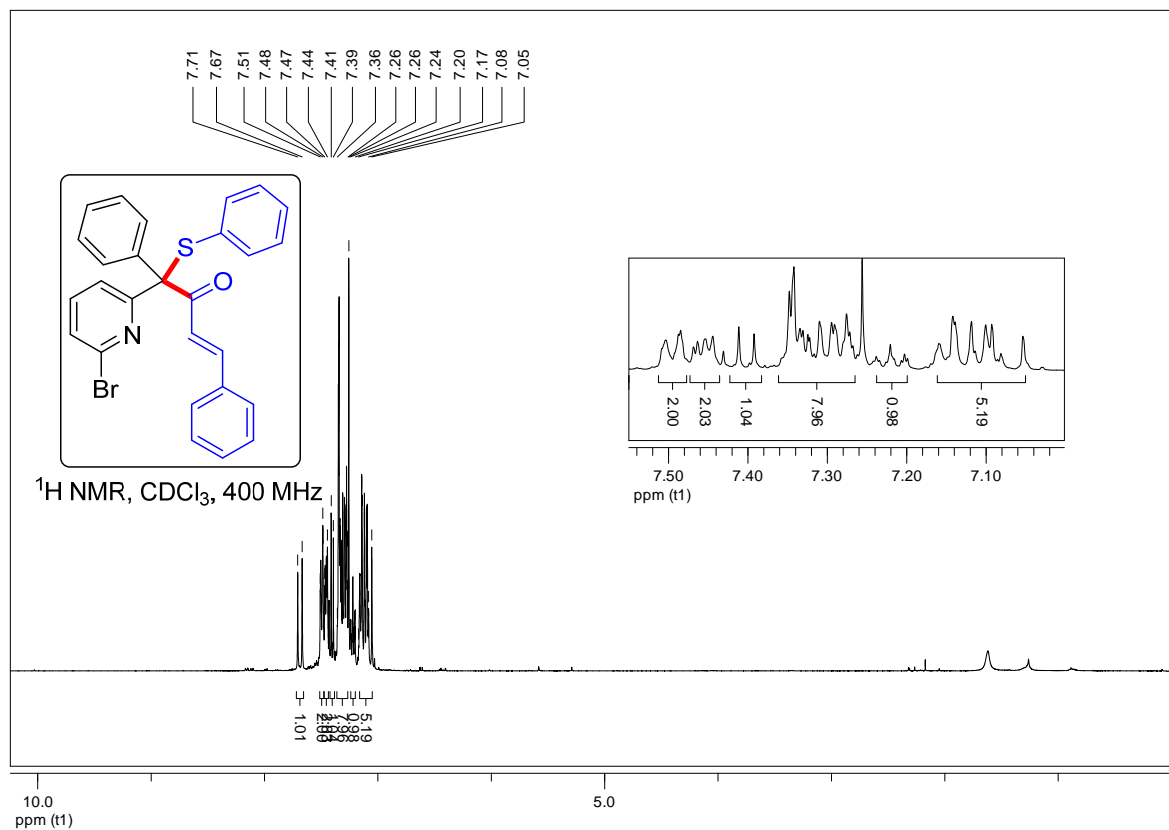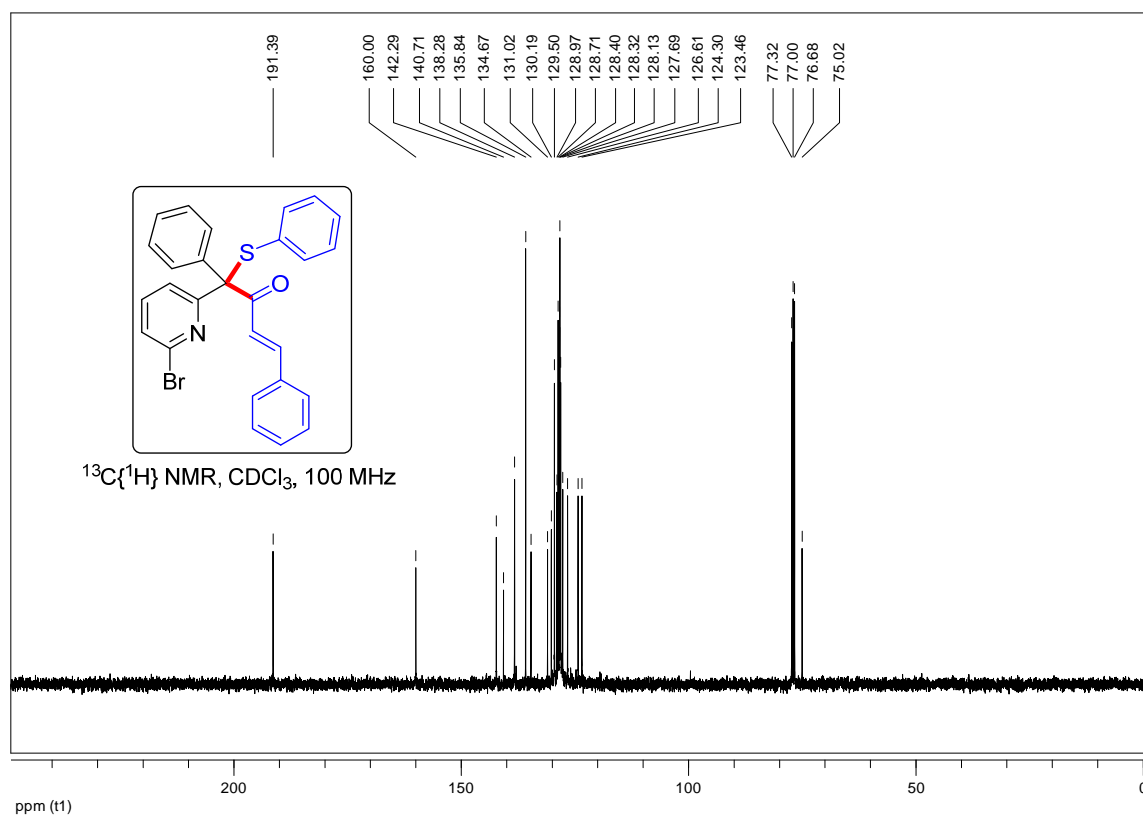

## 2-(6-bromopyridin-2-yl)-1,2-diphenyl-2-(phenylthio)ethan-1-one (3ae)

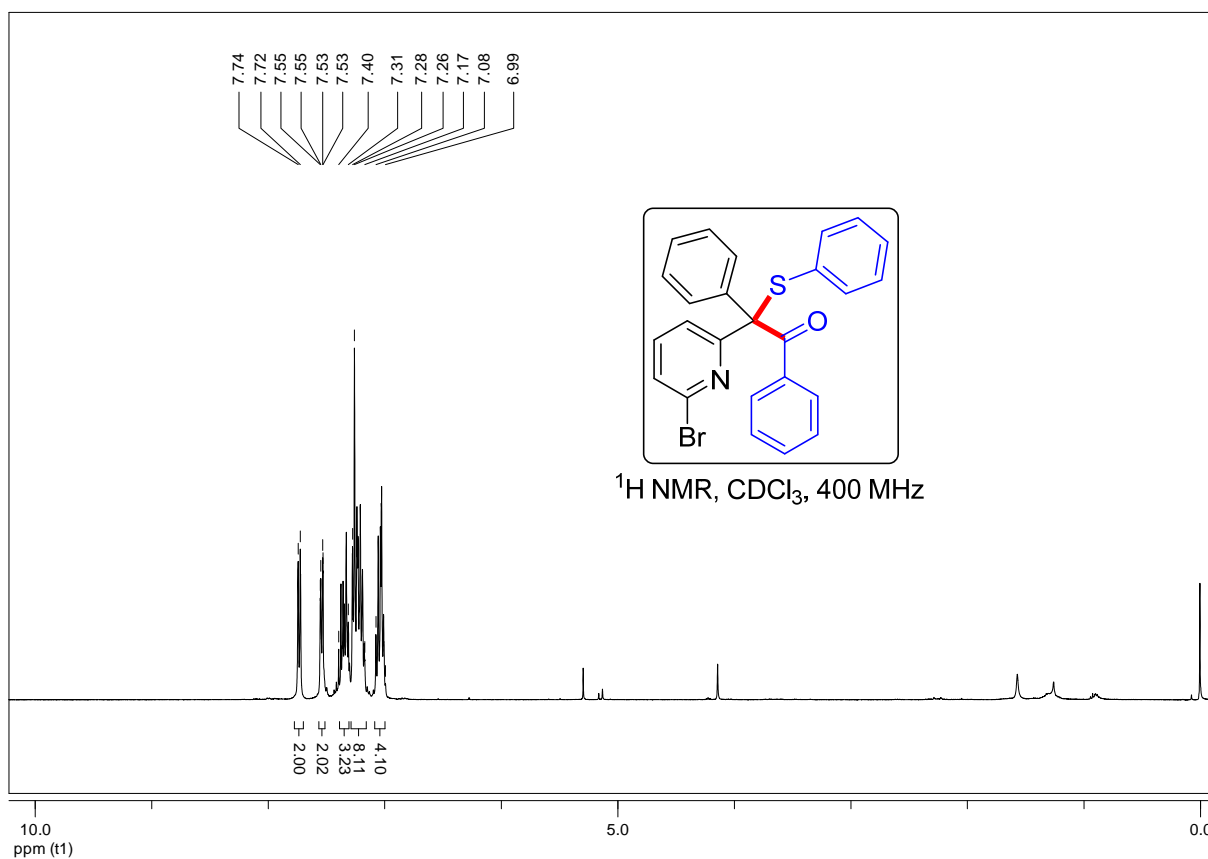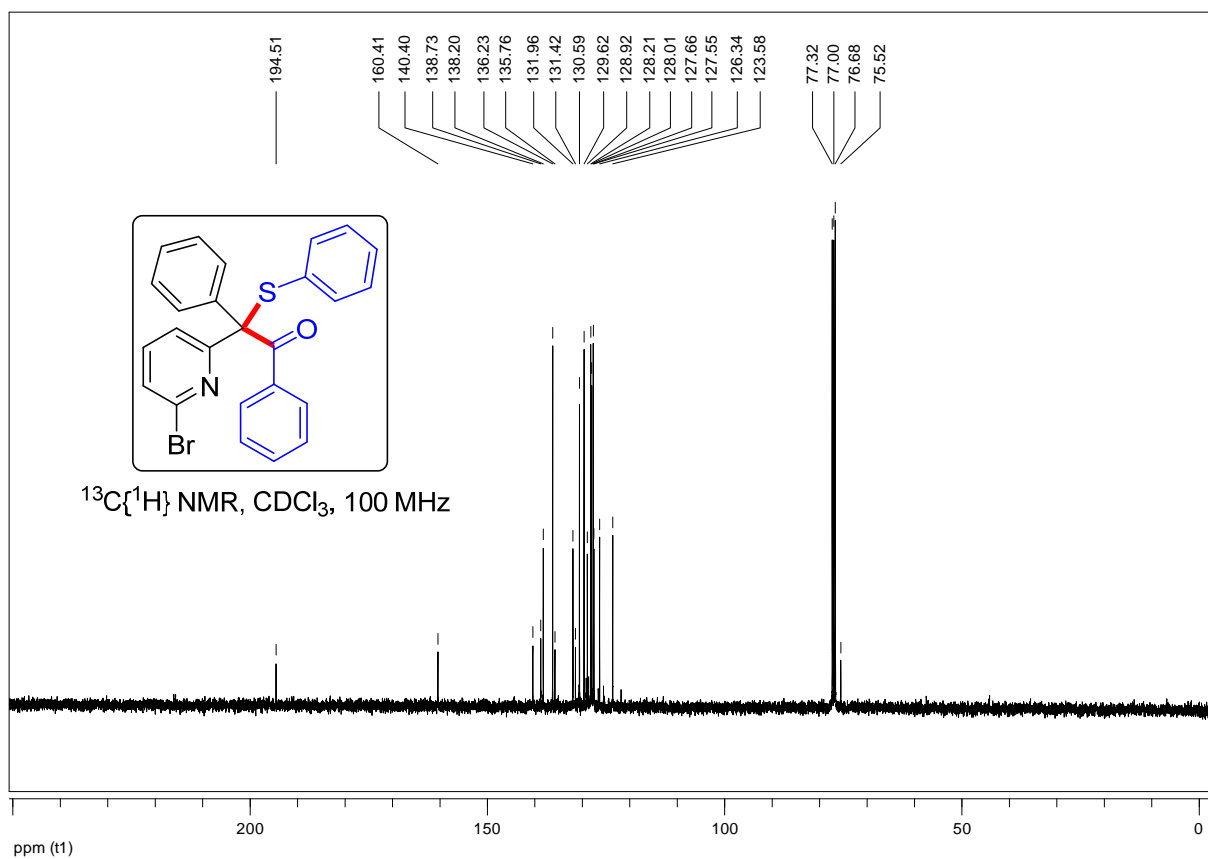

# 1-(6-bromopyridin-2-yl)-1-phenyl-1-(o-tolylthio)propan-2-one (3af)

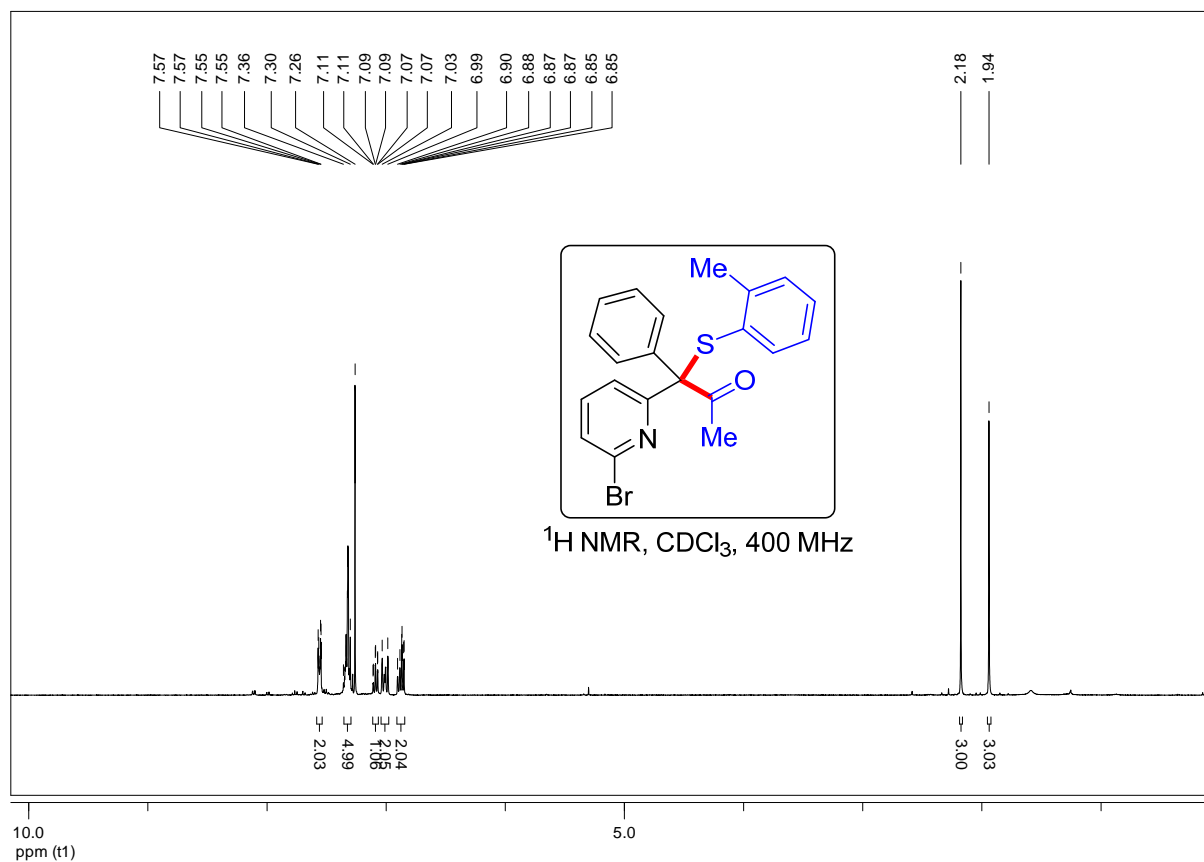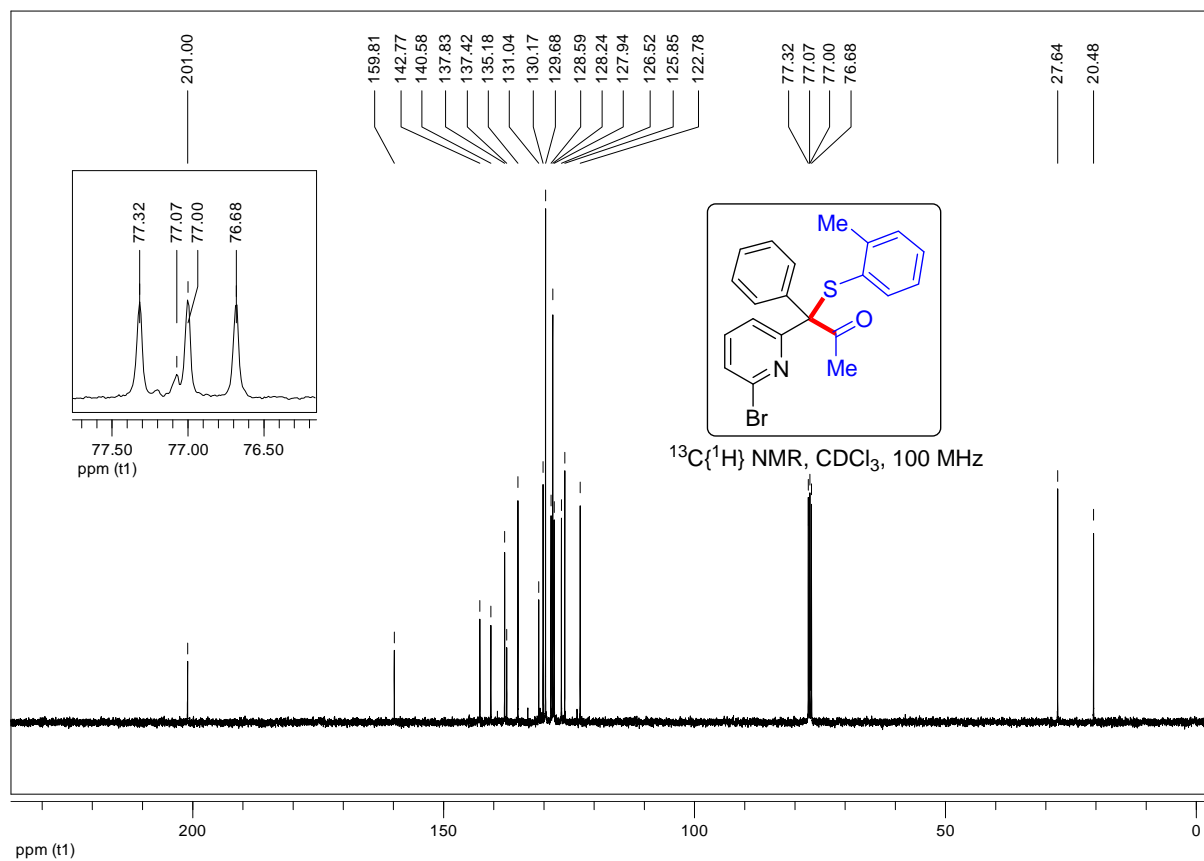

# 1-(6-bromopyridin-2-yl)-1-phenyl-1-(m-tolylthio)propan-2-one (3ag)

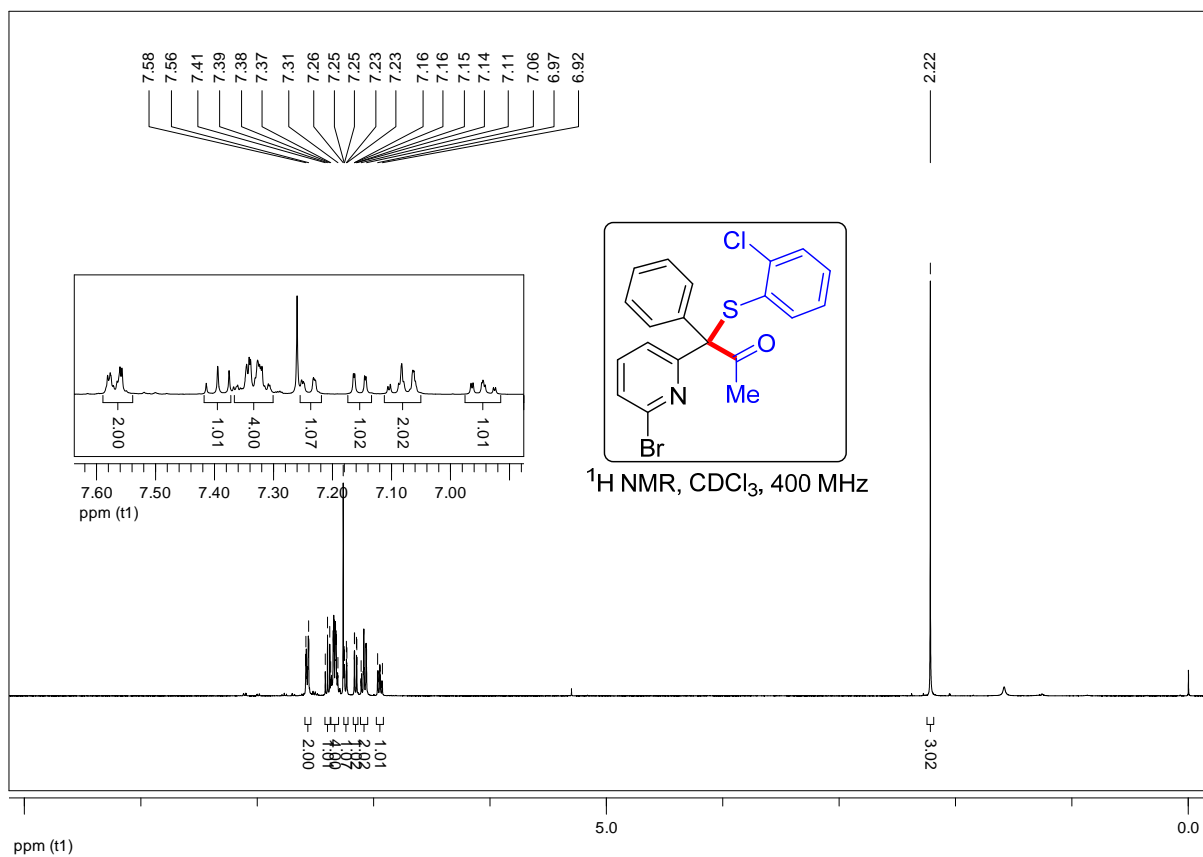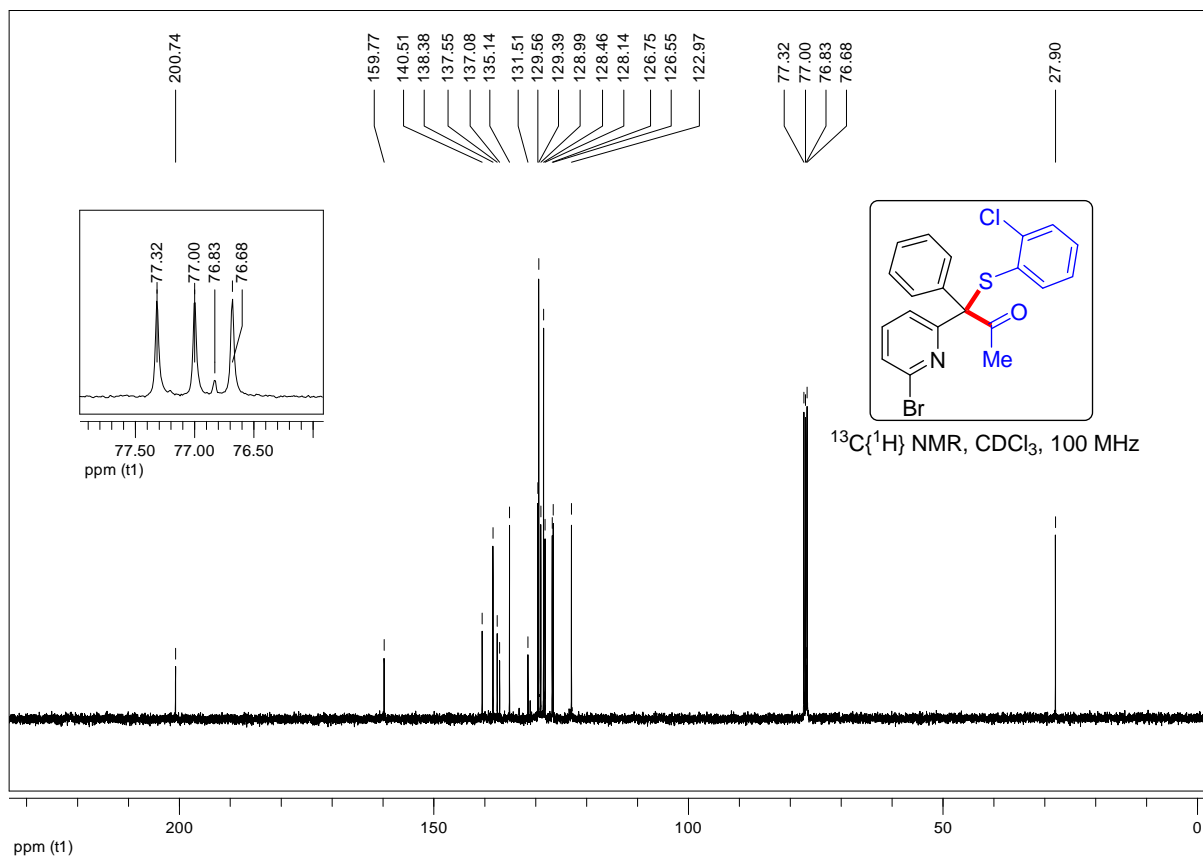

# 1-(6-bromopyridin-2-yl)-1-phenyl-1-(m-tolylthio)propan-2-one (3ah)

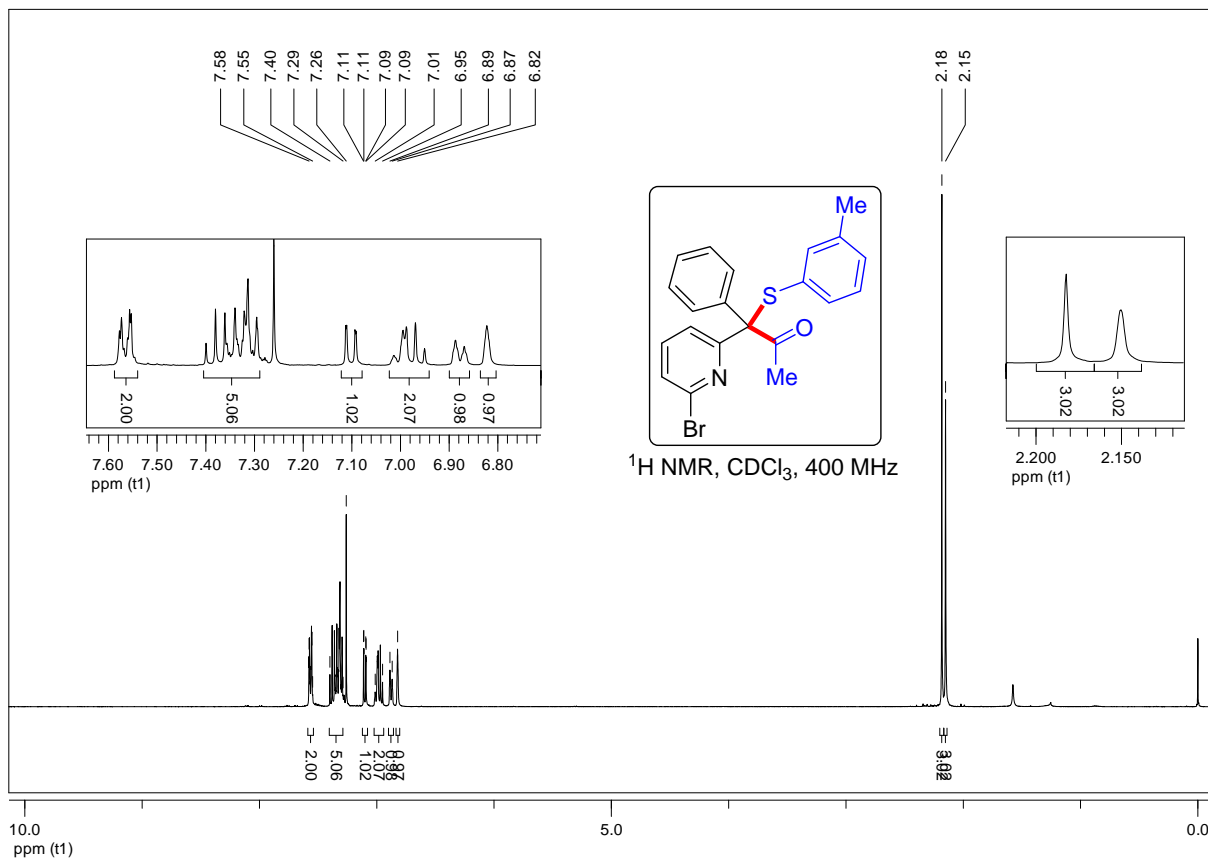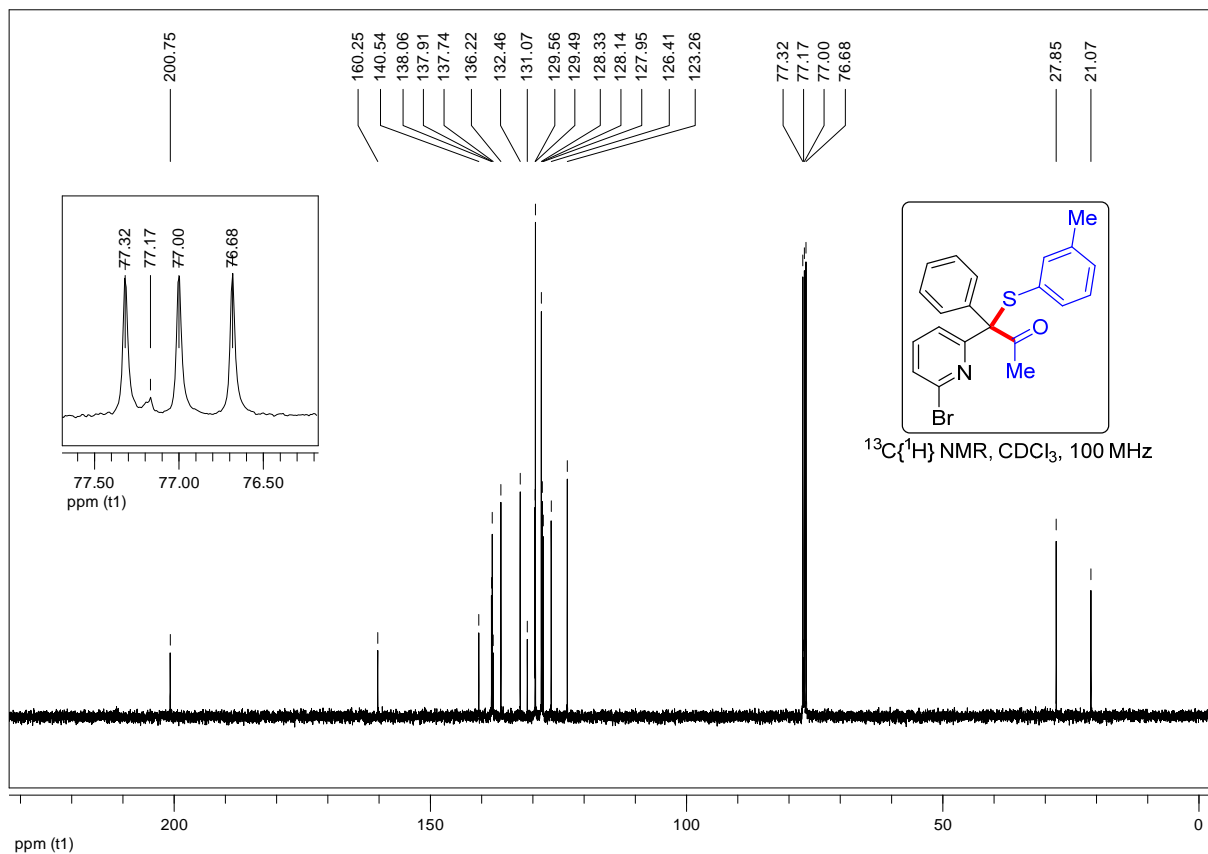

# 1-(6-bromopyridin-2-yl)-1-phenyl-1-(p-tolylthio)propan-2-one (3ai)

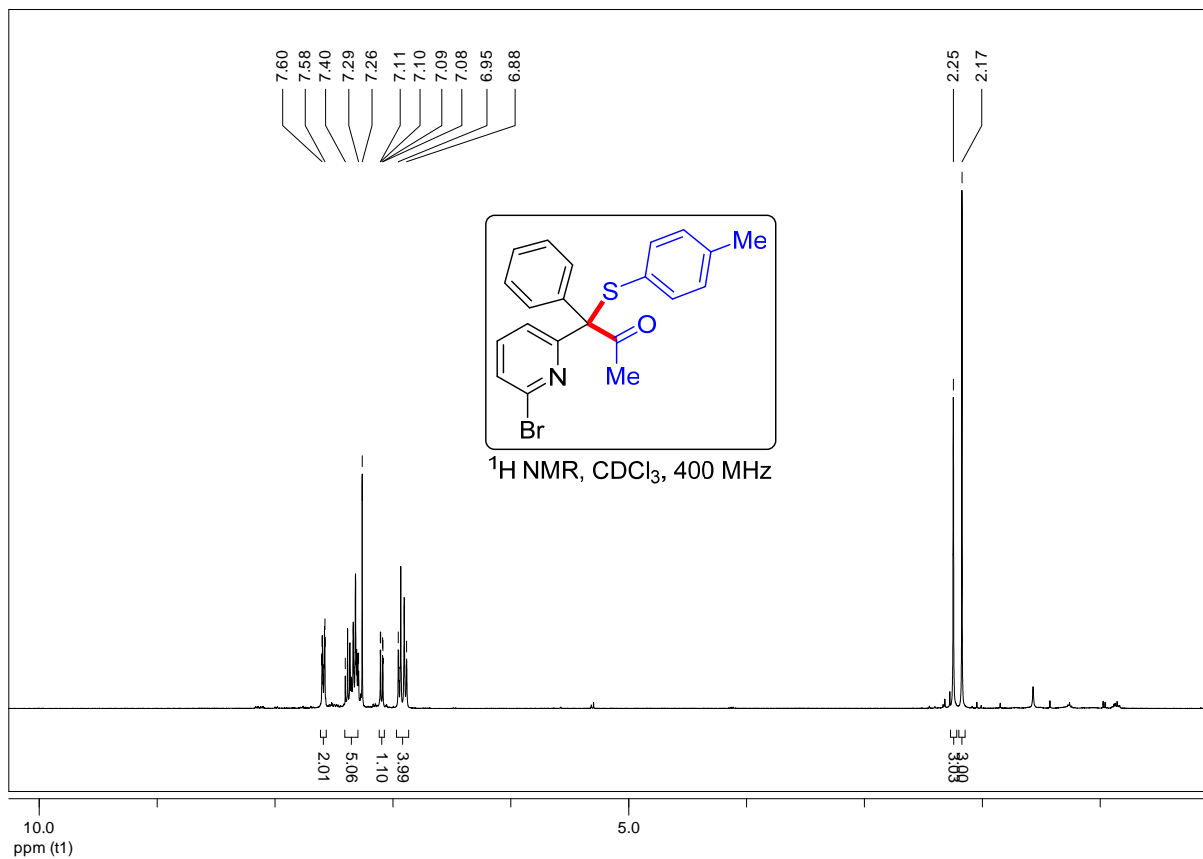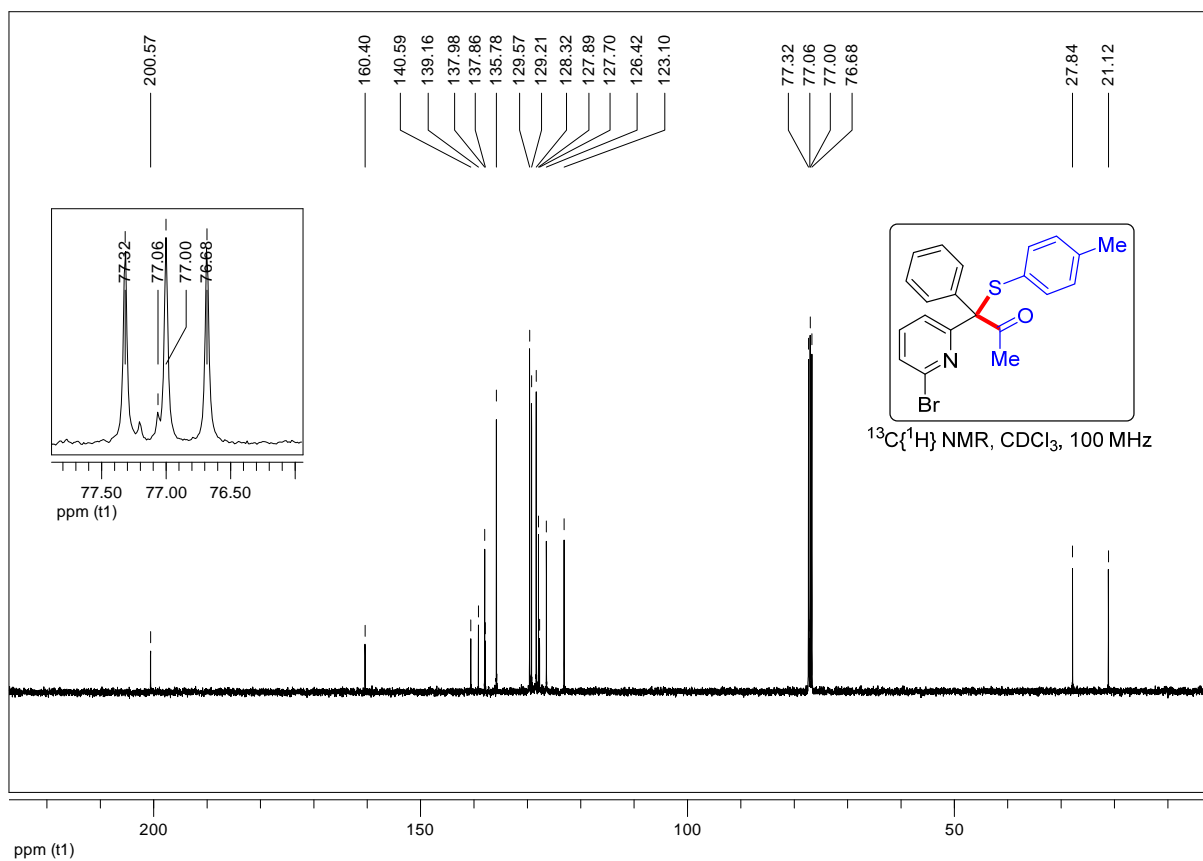



# 1-(6-bromopyridin-2-yl)-1-((4-methoxyphenyl)thio)-1-phenylpropan-2-one

(3aj)

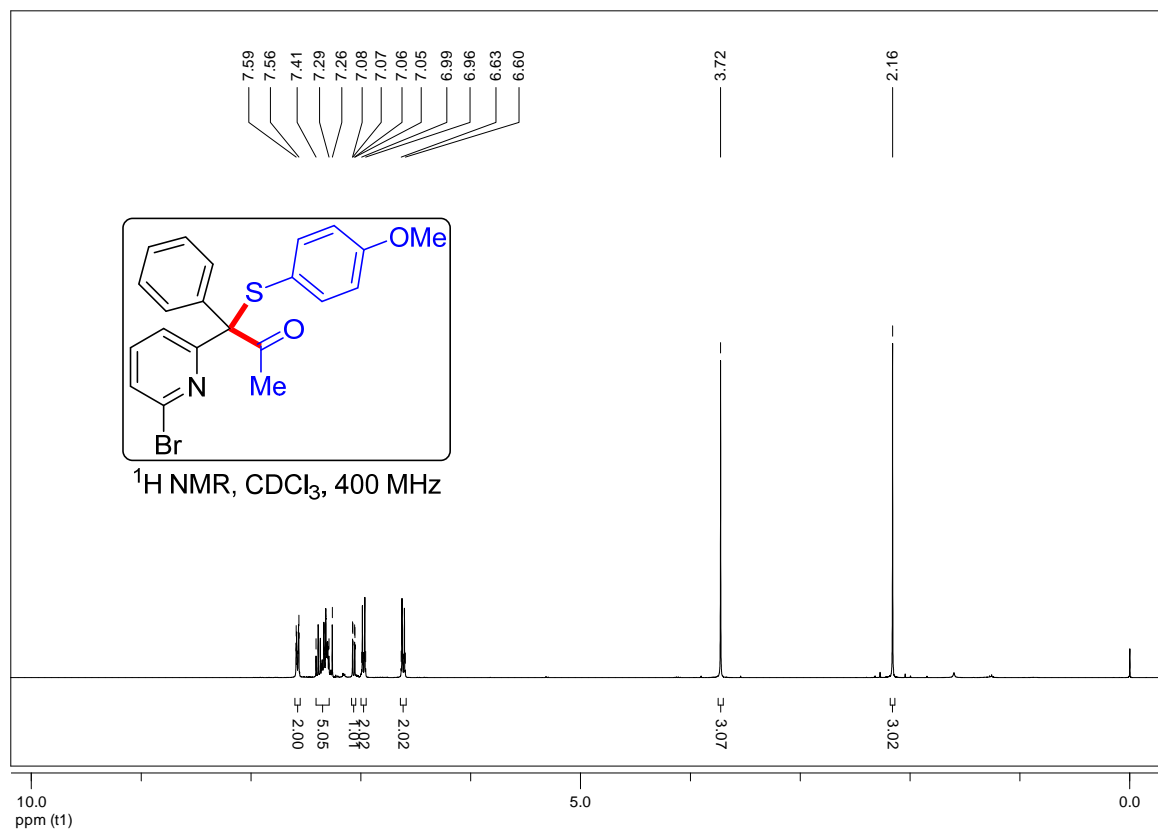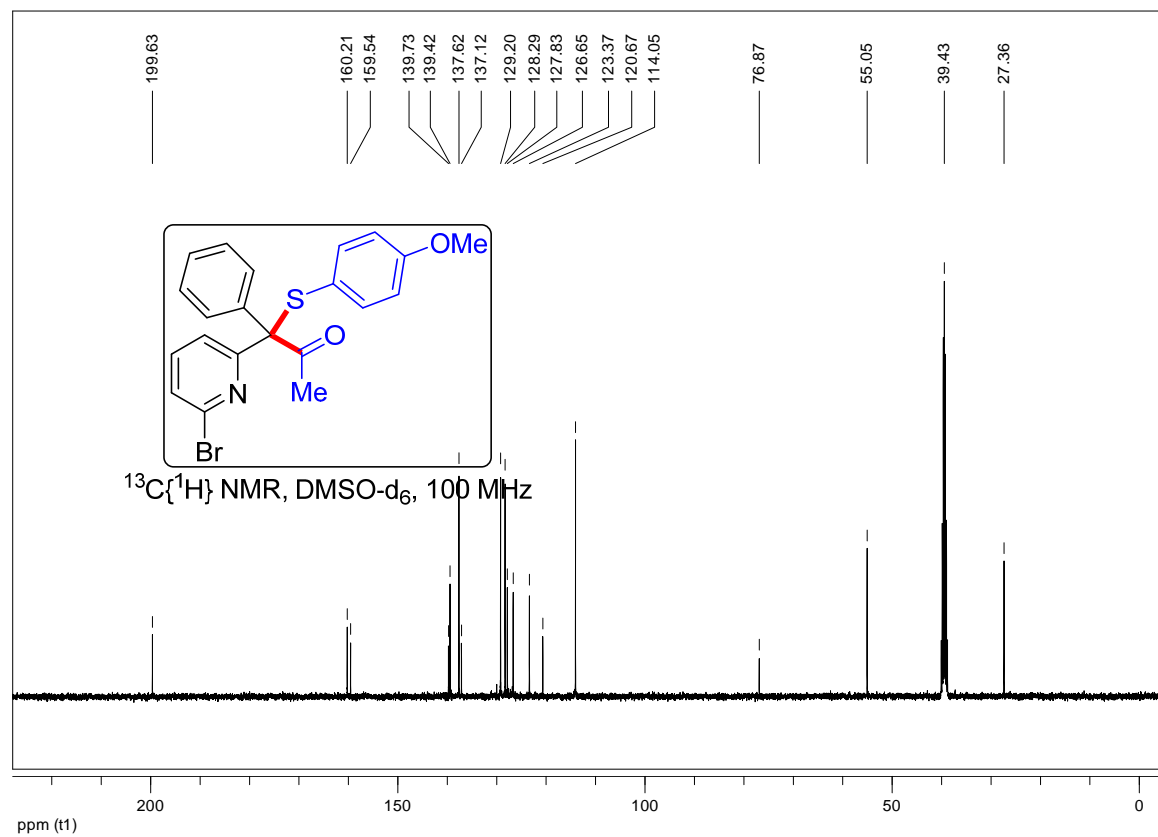

# 1-(6-bromopyridin-2-yl)-1-((4-fluorophenyl)thio)-1-phenylpropan-2-one (3ak)

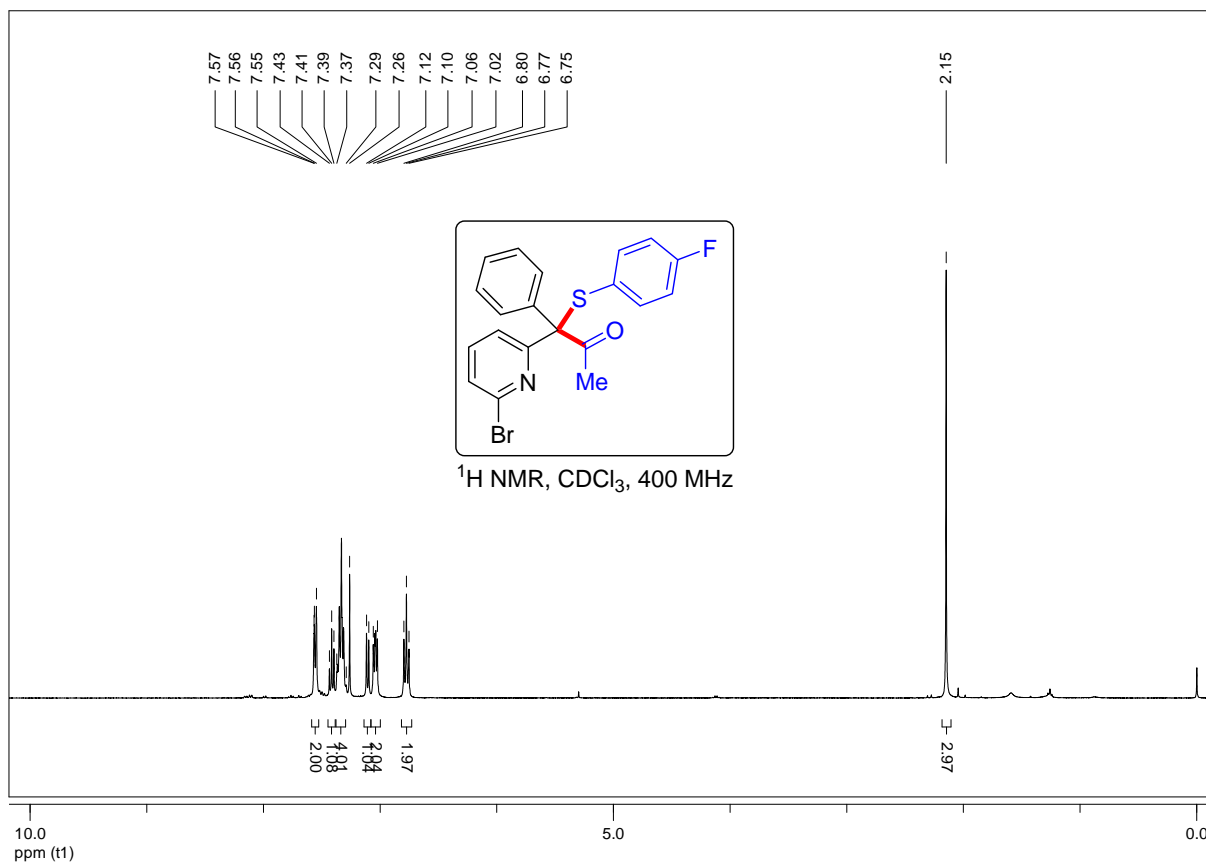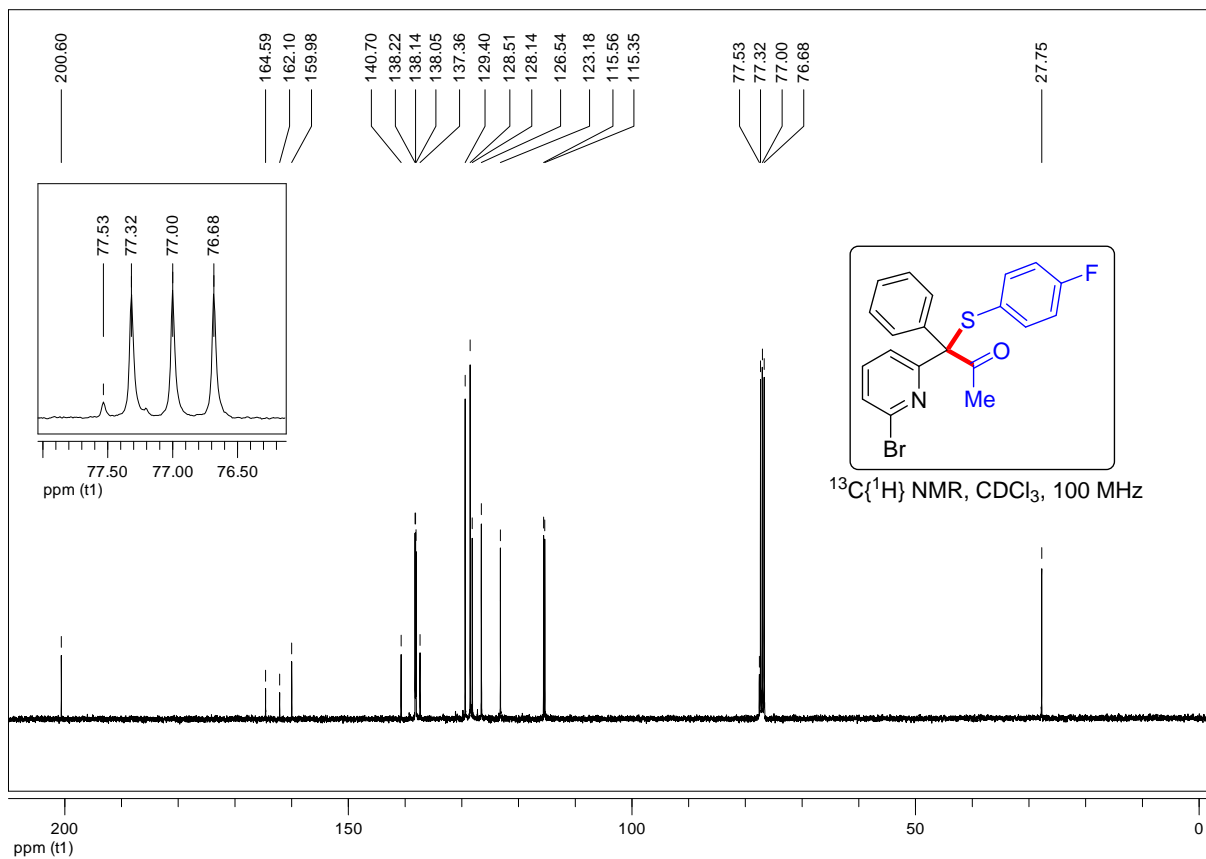

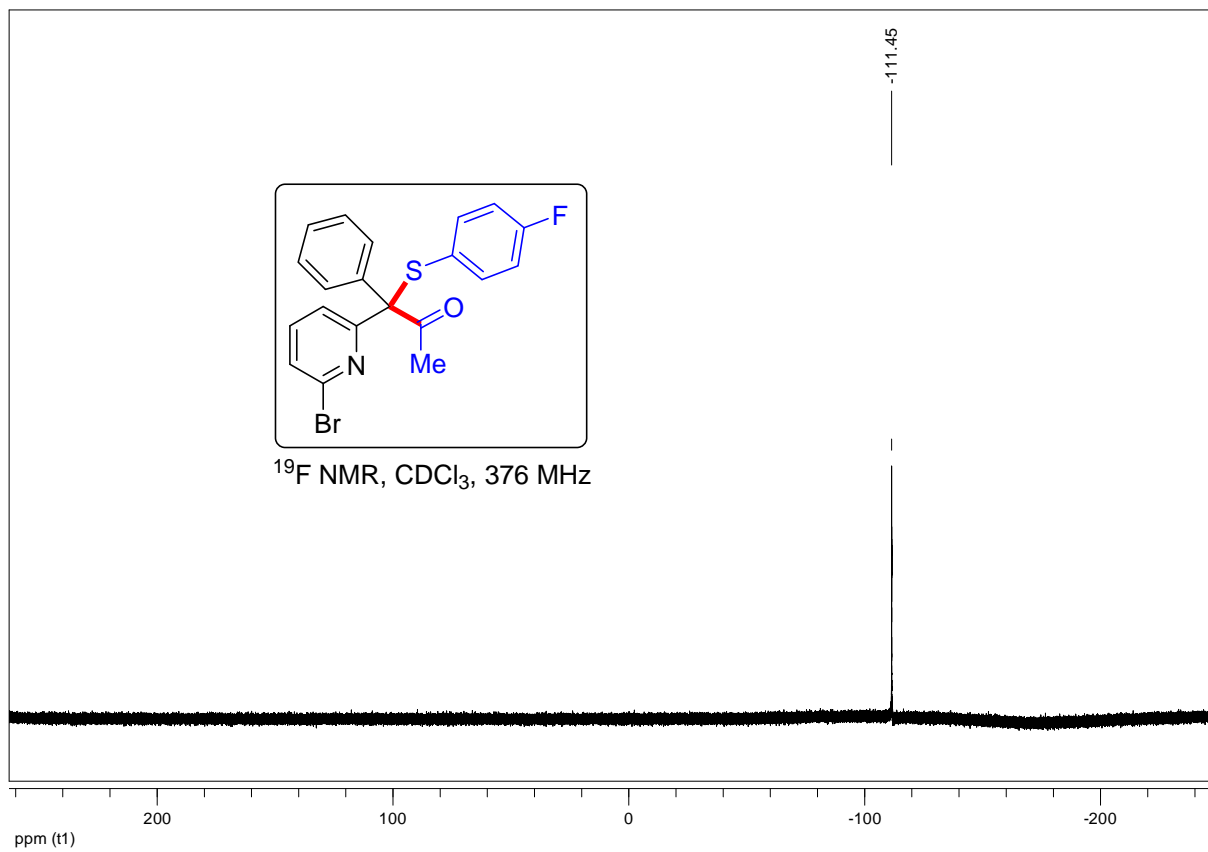

# 1-(6-bromopyridin-2-yl)-1-((4-chlorophenyl)thio)-1-phenylpropan-2-one (3aI)

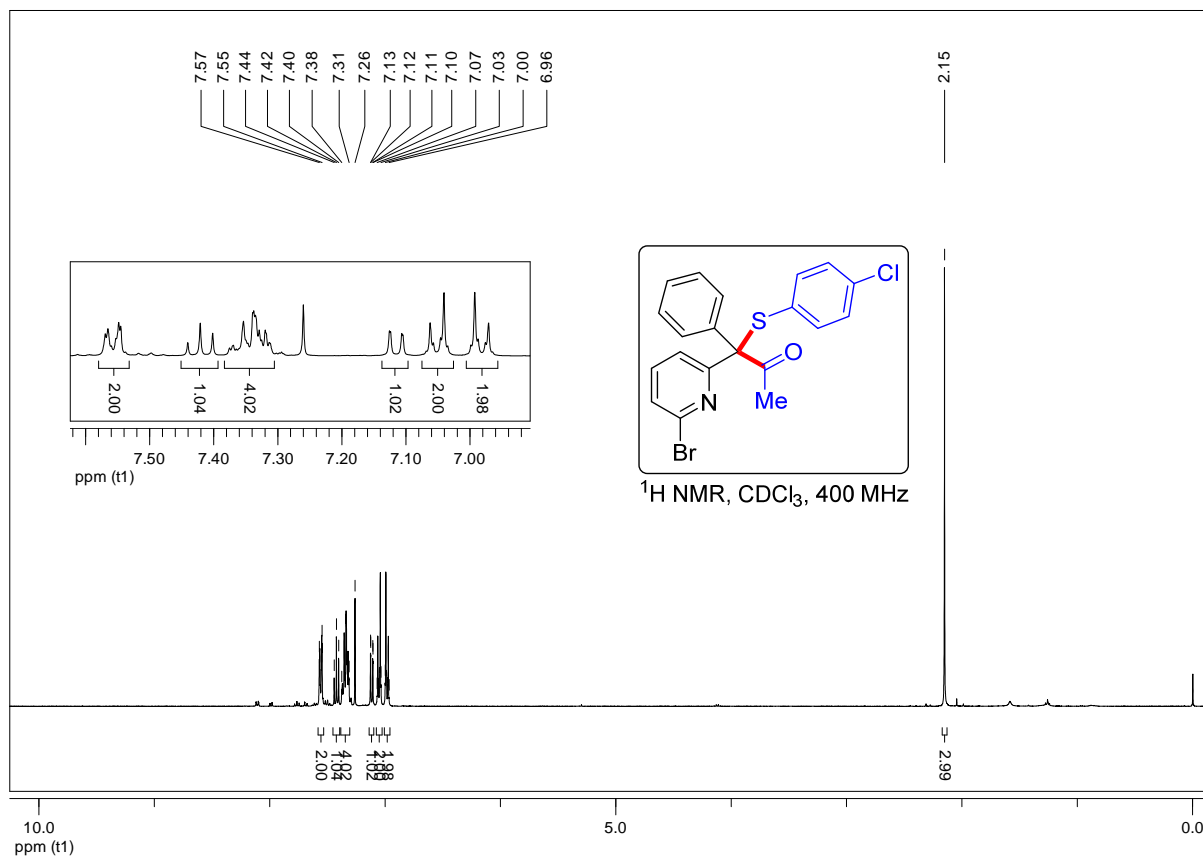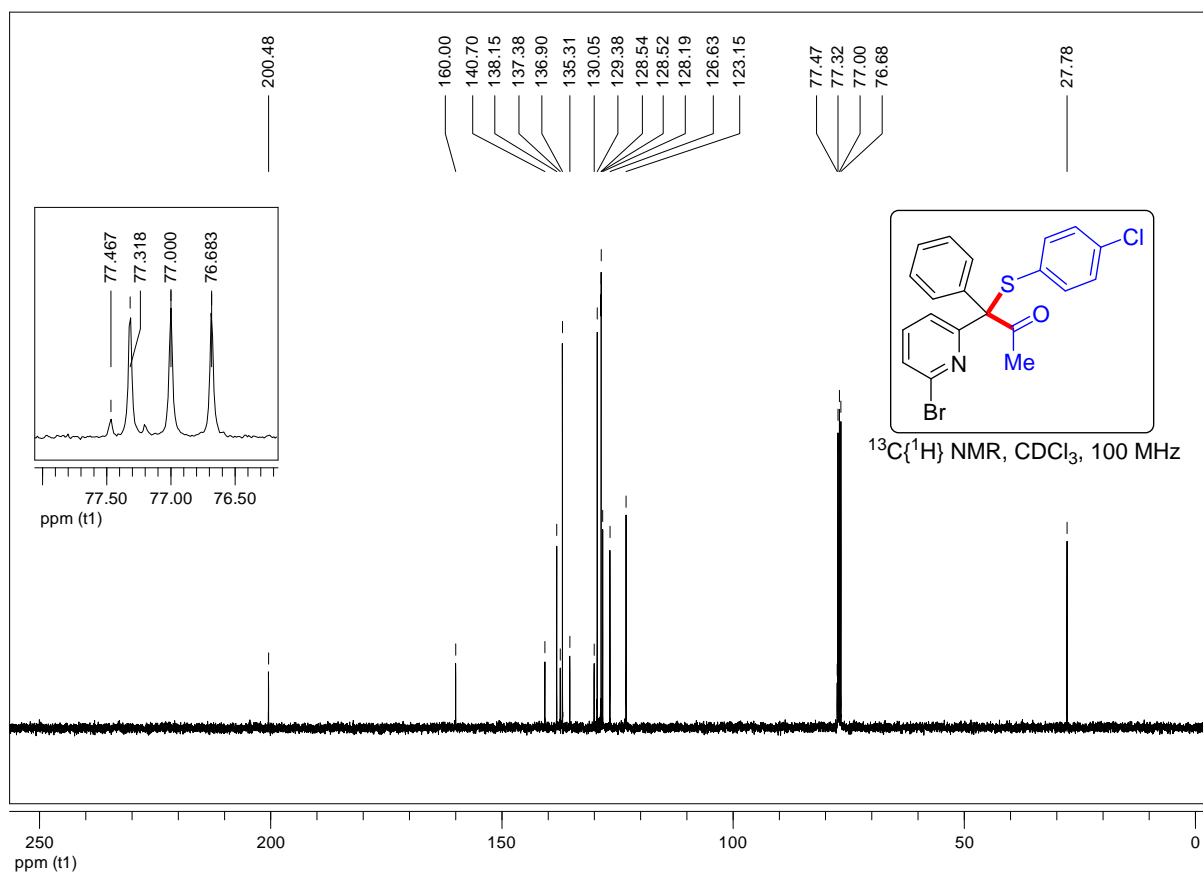

**1-((4-bromophenyl)thio)-1-(6-bromopyridin-2-yl)-1-phenylpropan-2-one(3am)**

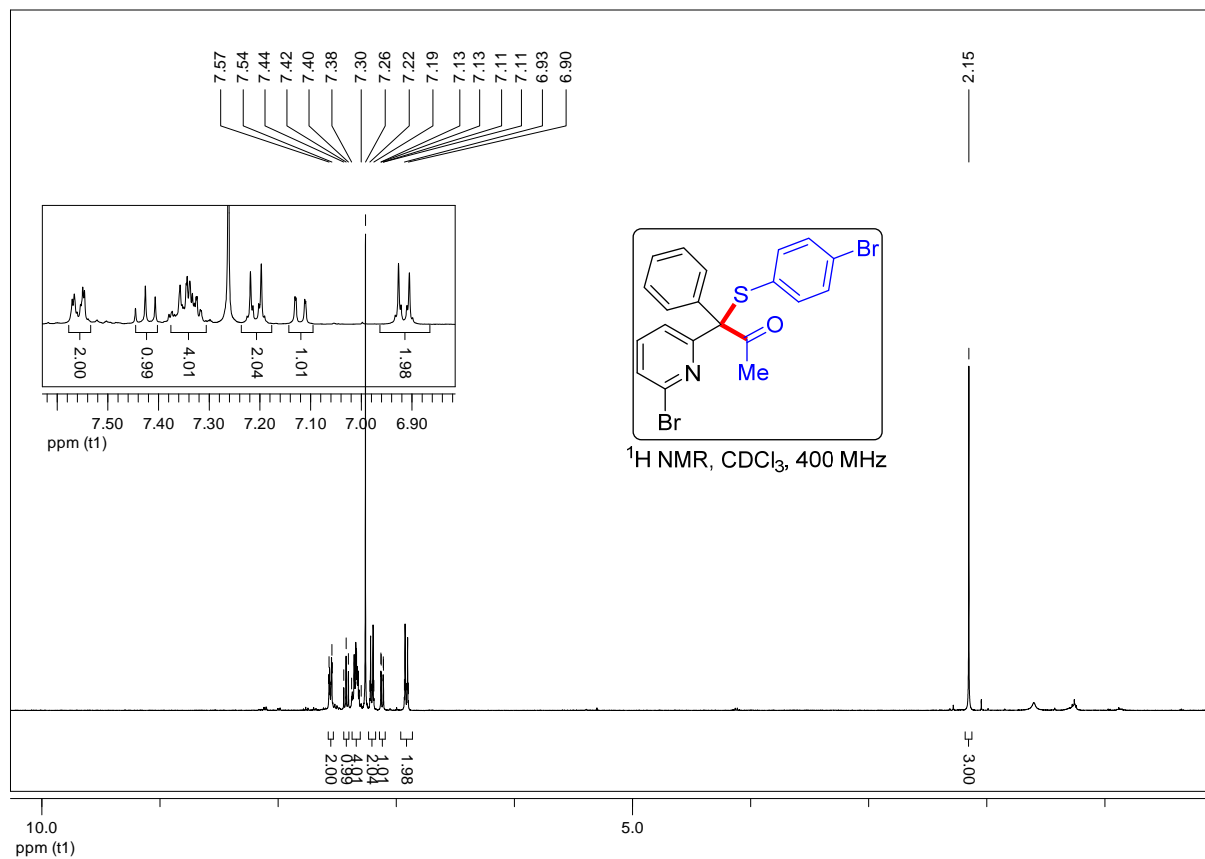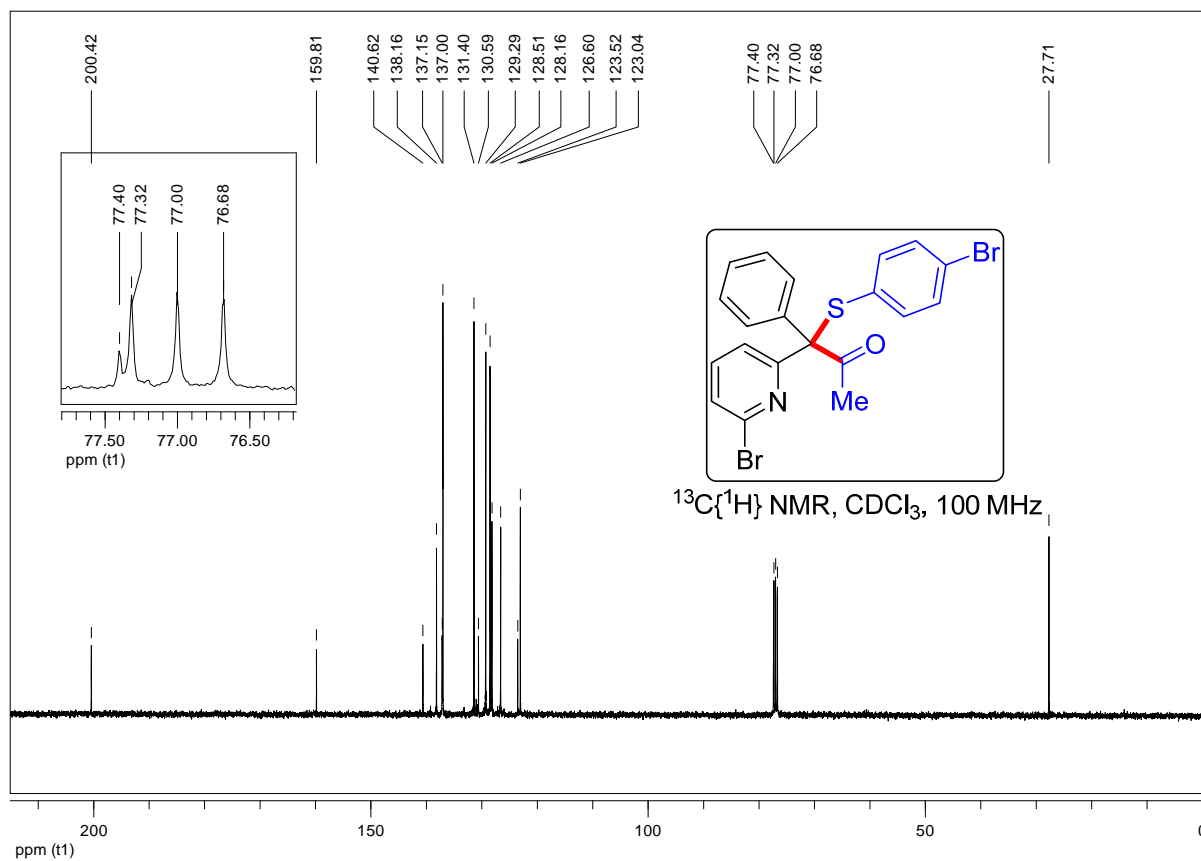

# 1-(6-bromopyridin-2-yl)-1-((4-iodophenyl)thio)-1-phenylpropan-2-one (3an)

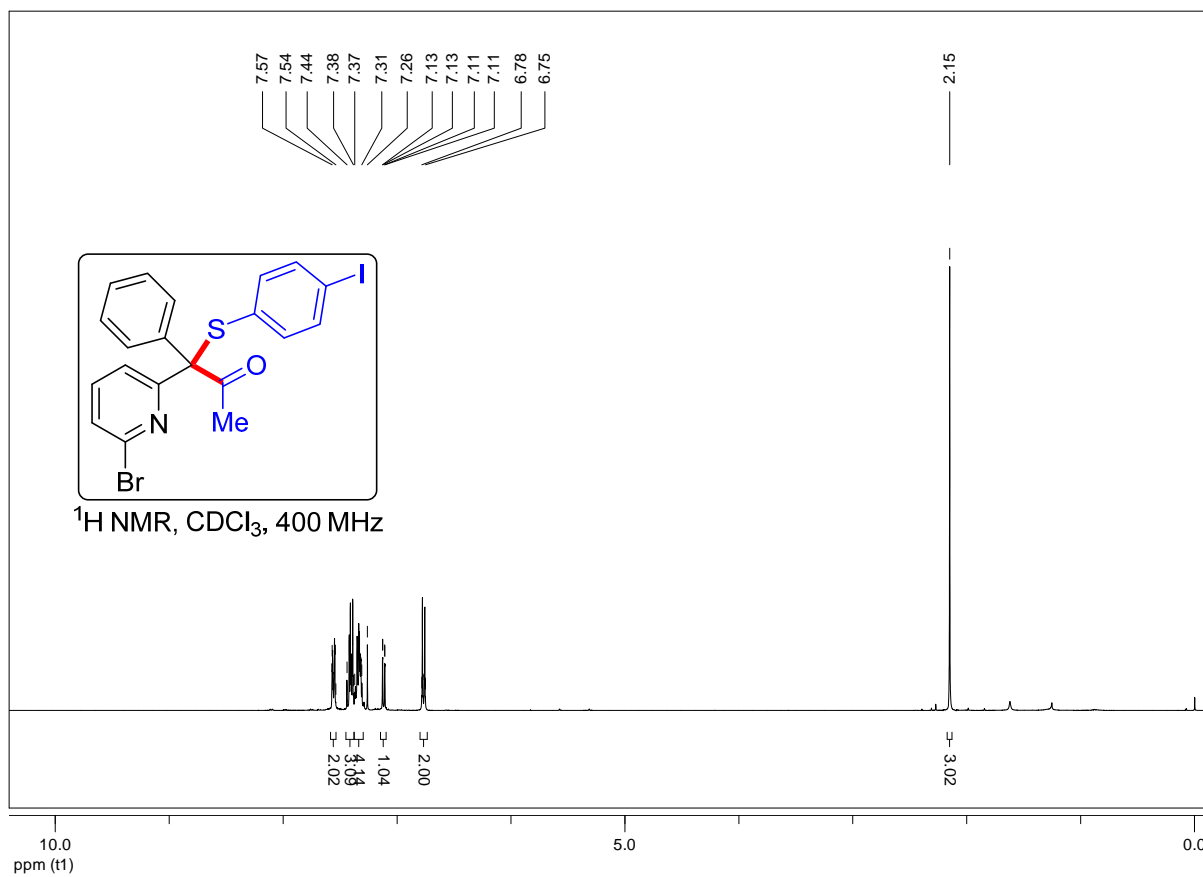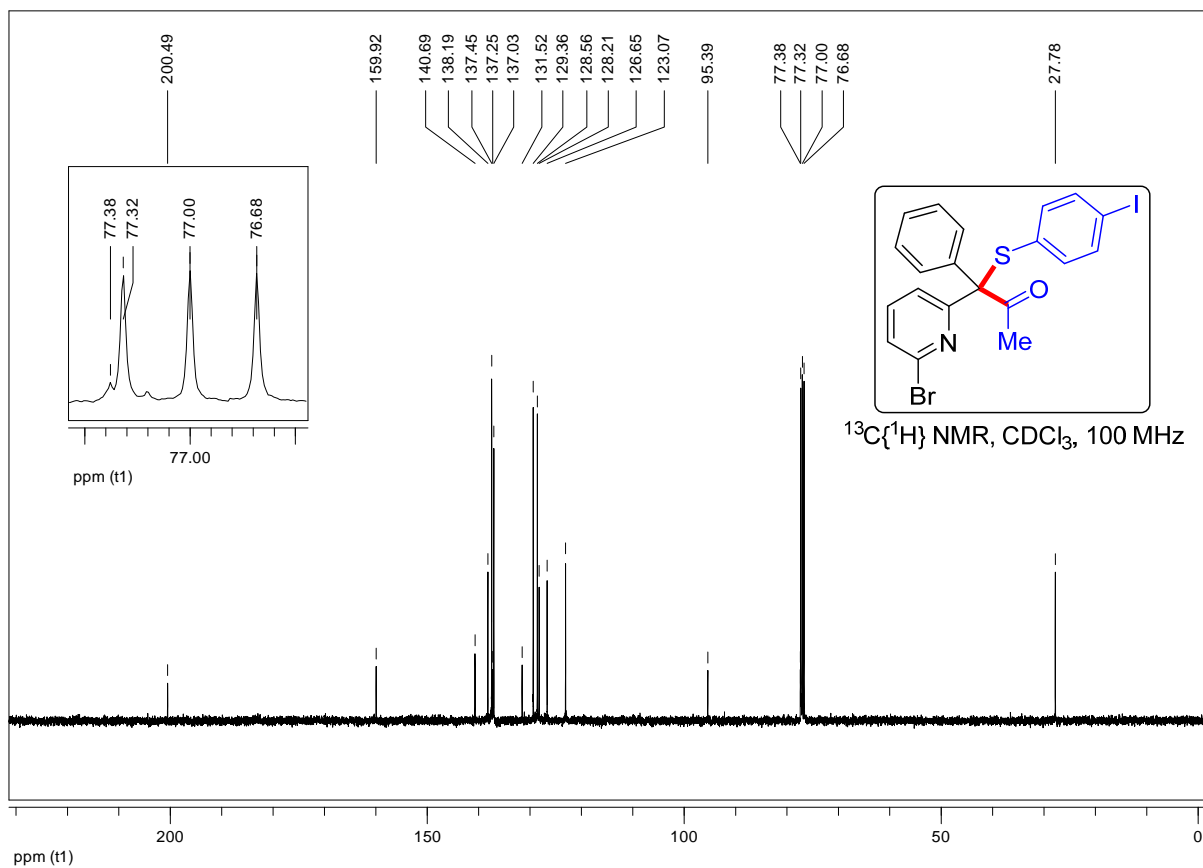

4-((1-(6-bromopyridin-2-yl)-2-oxo-1-phenylpropyl)thio)benzonitrile (3ao)

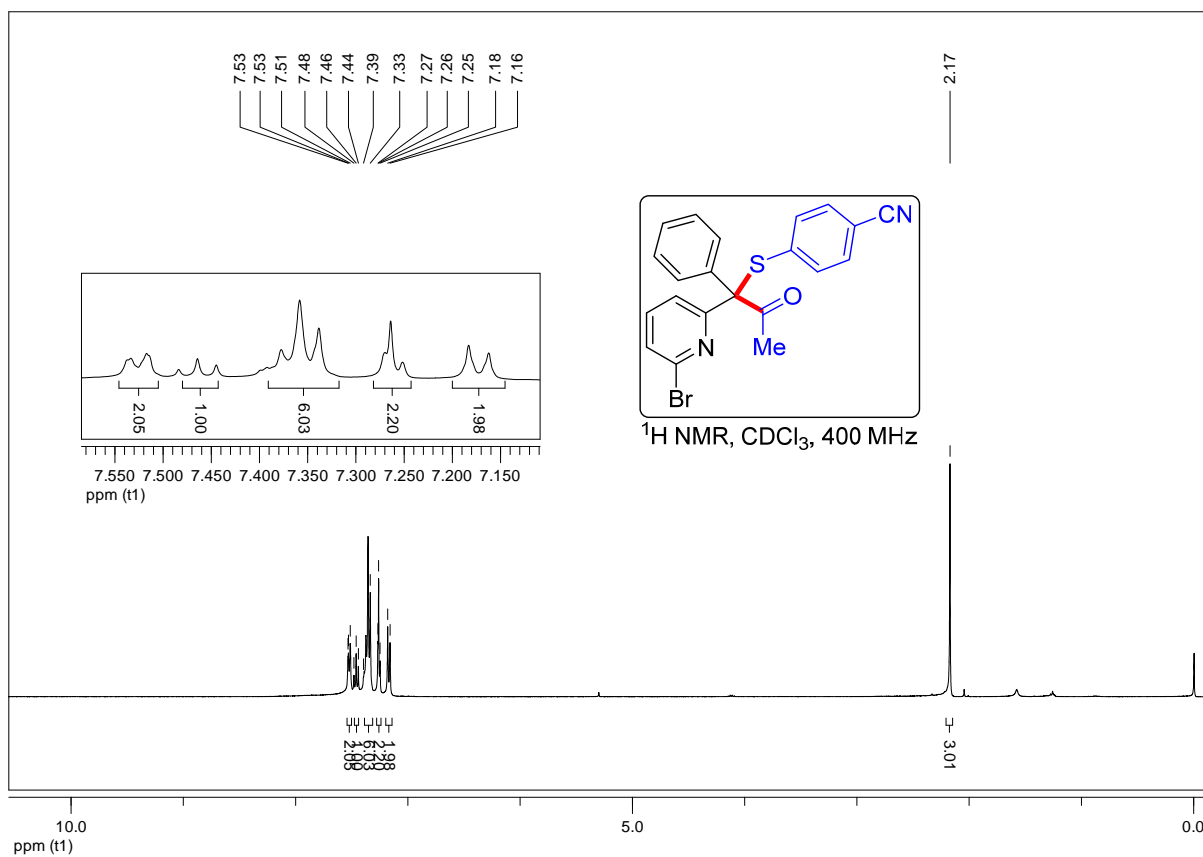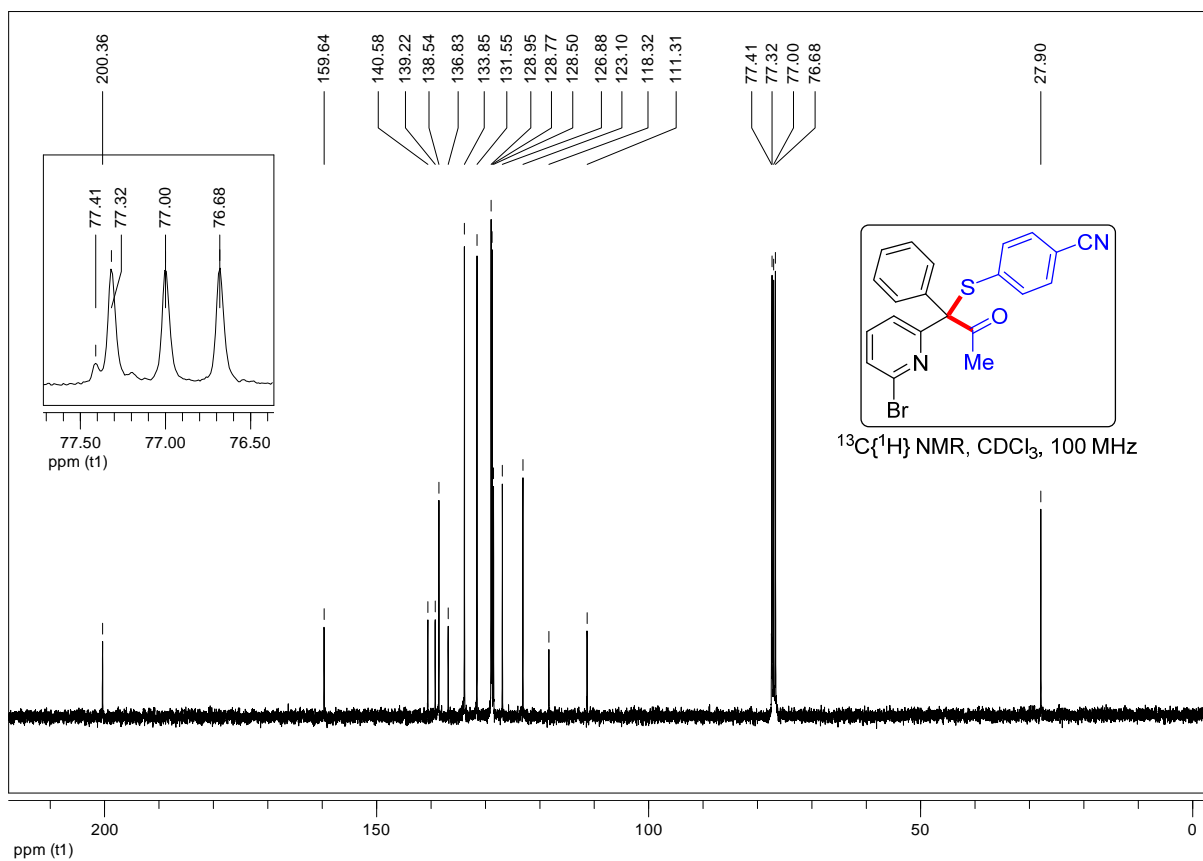

**1-(6-bromopyridin-2-yl)-1-((4-nitrophenyl)thio)-1-phenylpropan-2-one (3ap)**

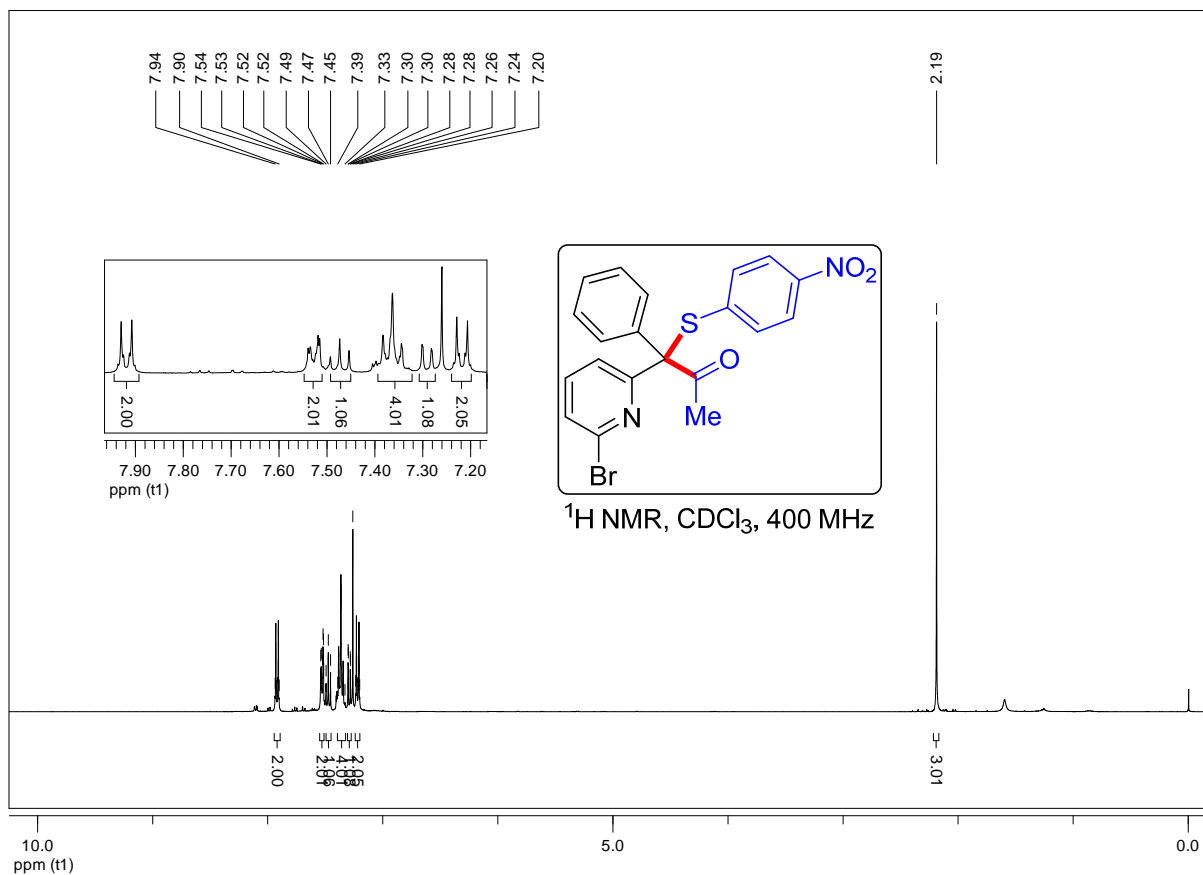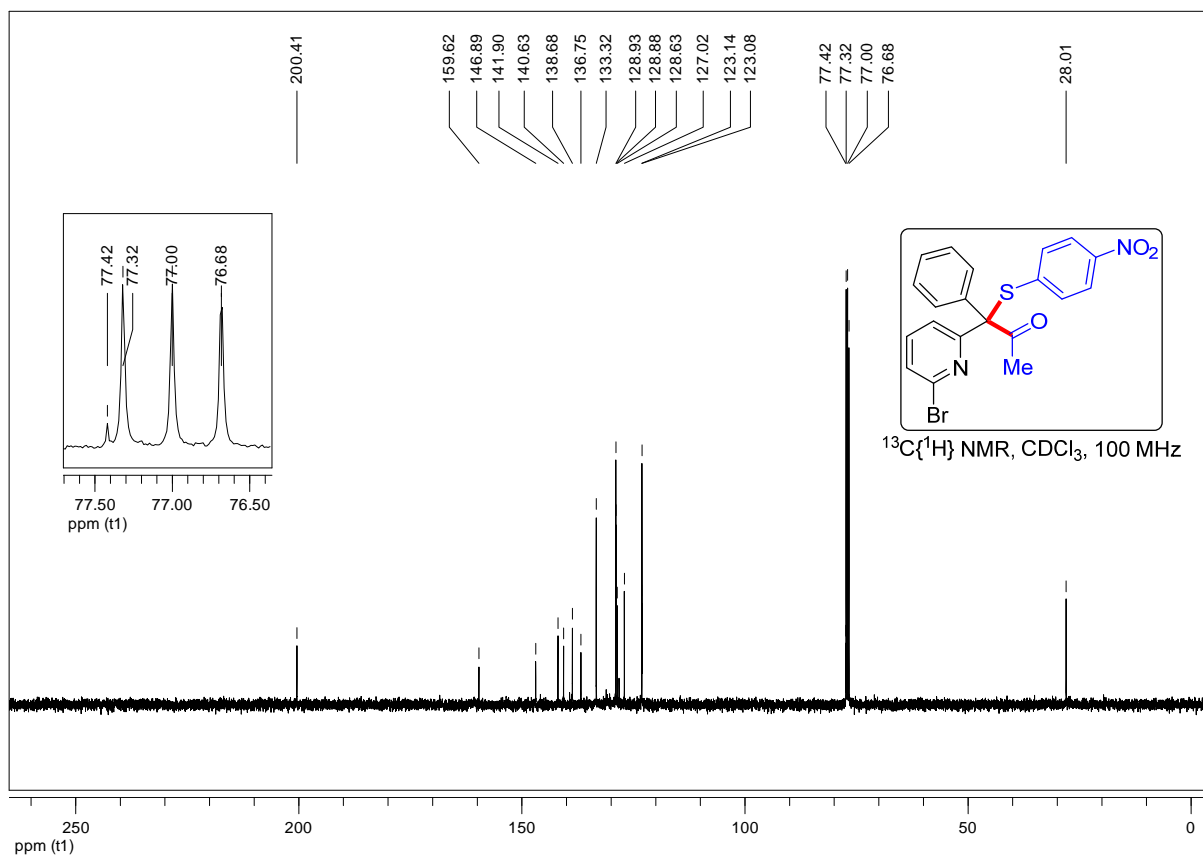



**1-((4-acetylphenyl)thio)-1-(6-bromopyridin-2-yl)-1-phenylpropan-2-one (3aq)**

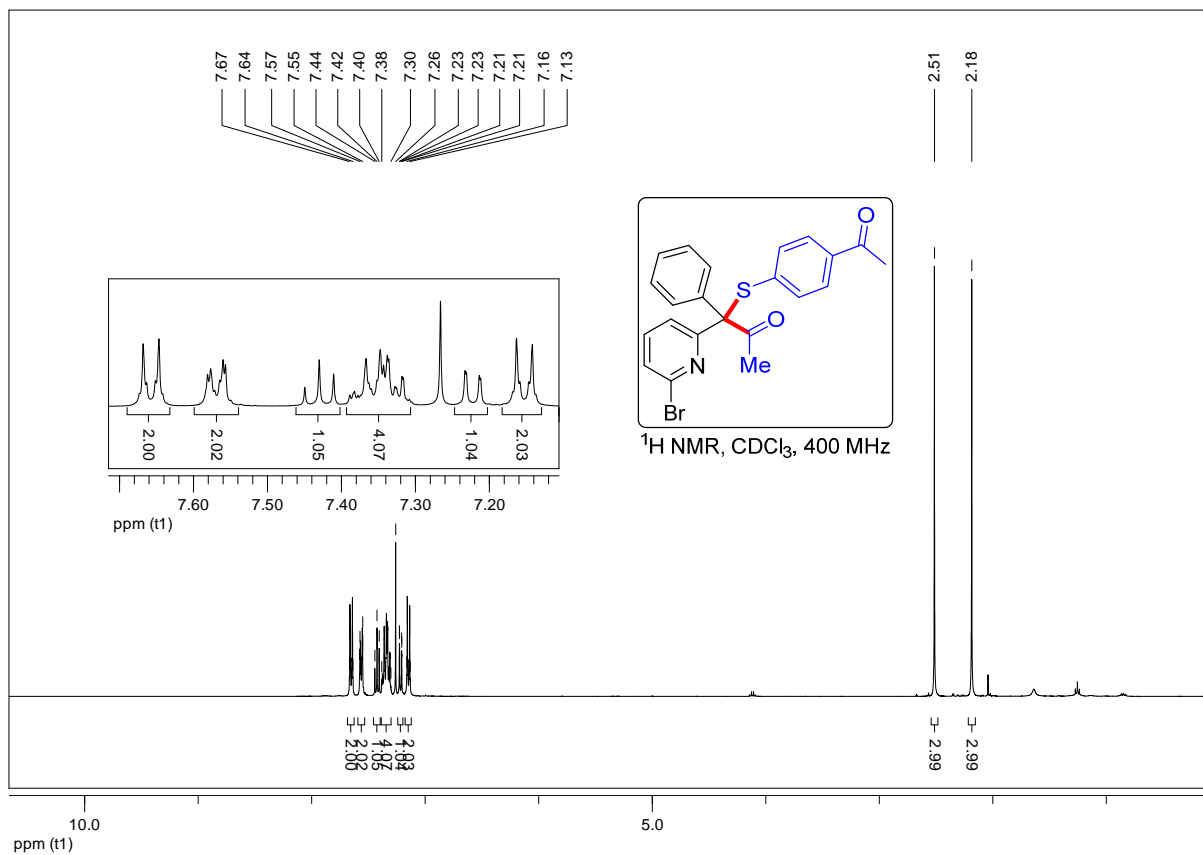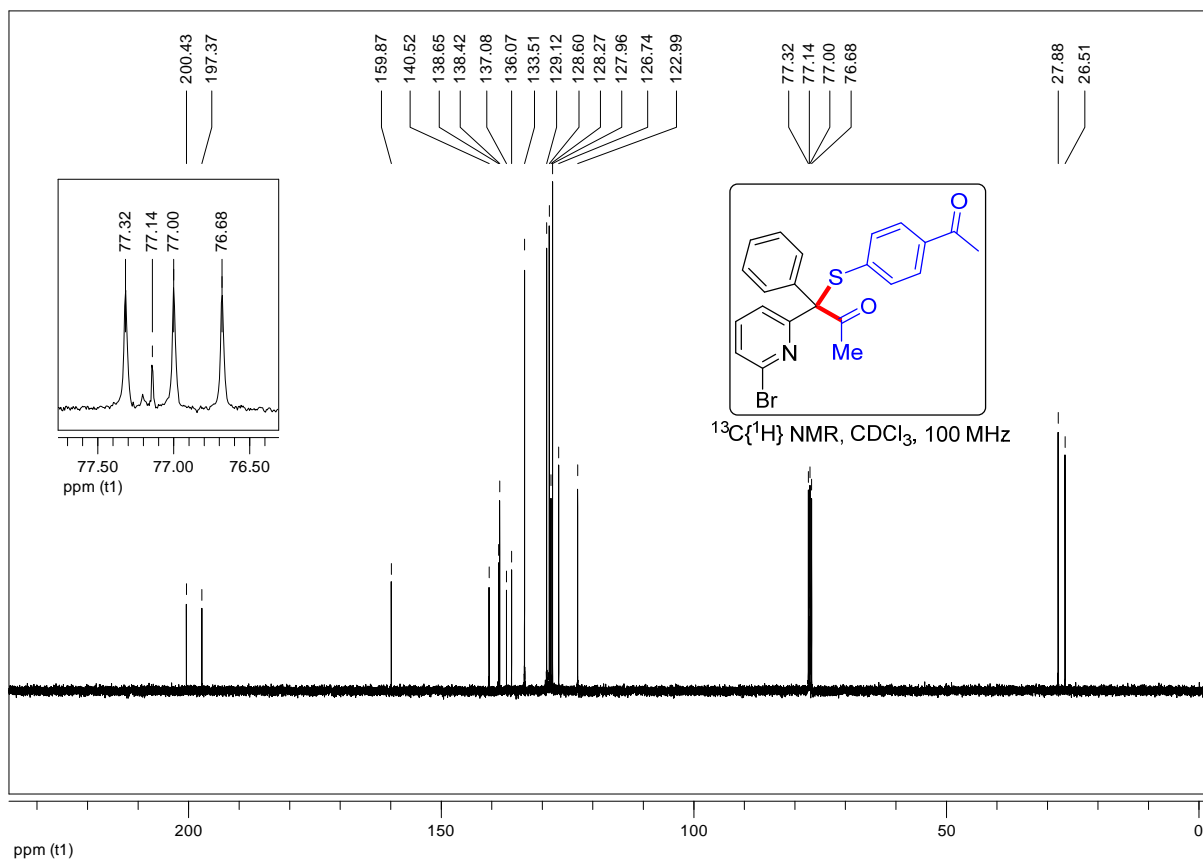

# 1-(6-bromopyridin-2-yl)-1-(naphthalen-2-ylthio)-1-phenylpropan-2-one (3ar)

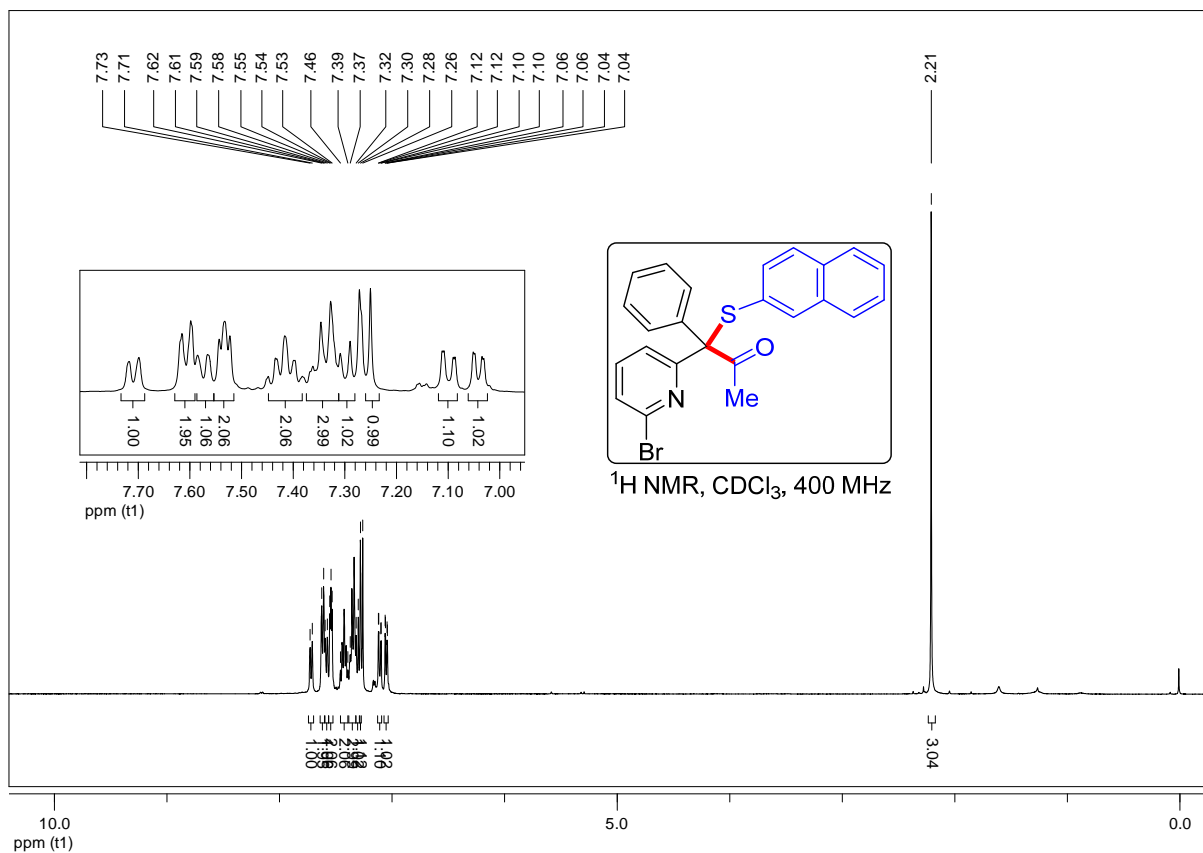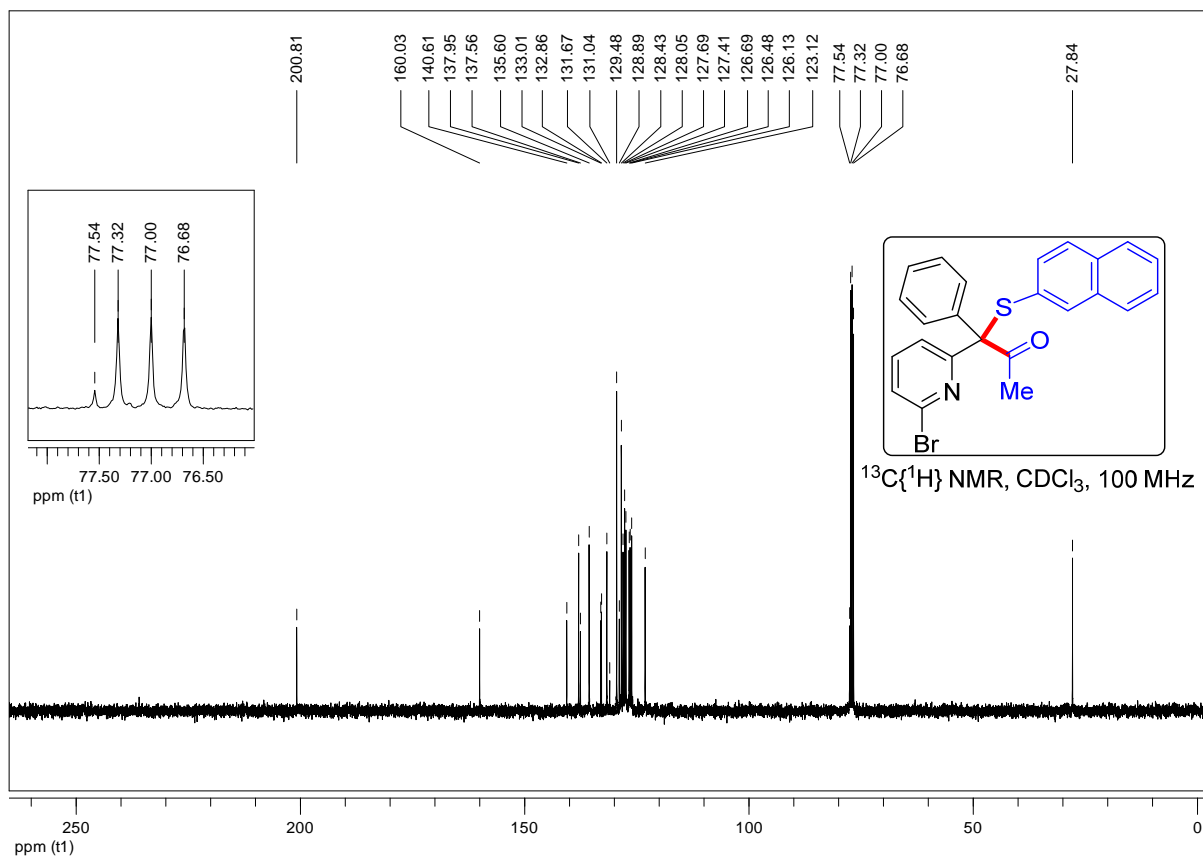

# 1-(6-bromopyridin-2-yl)-1-phenyl-1-(thiophen-2-ylthio)propan-2-one (3as)

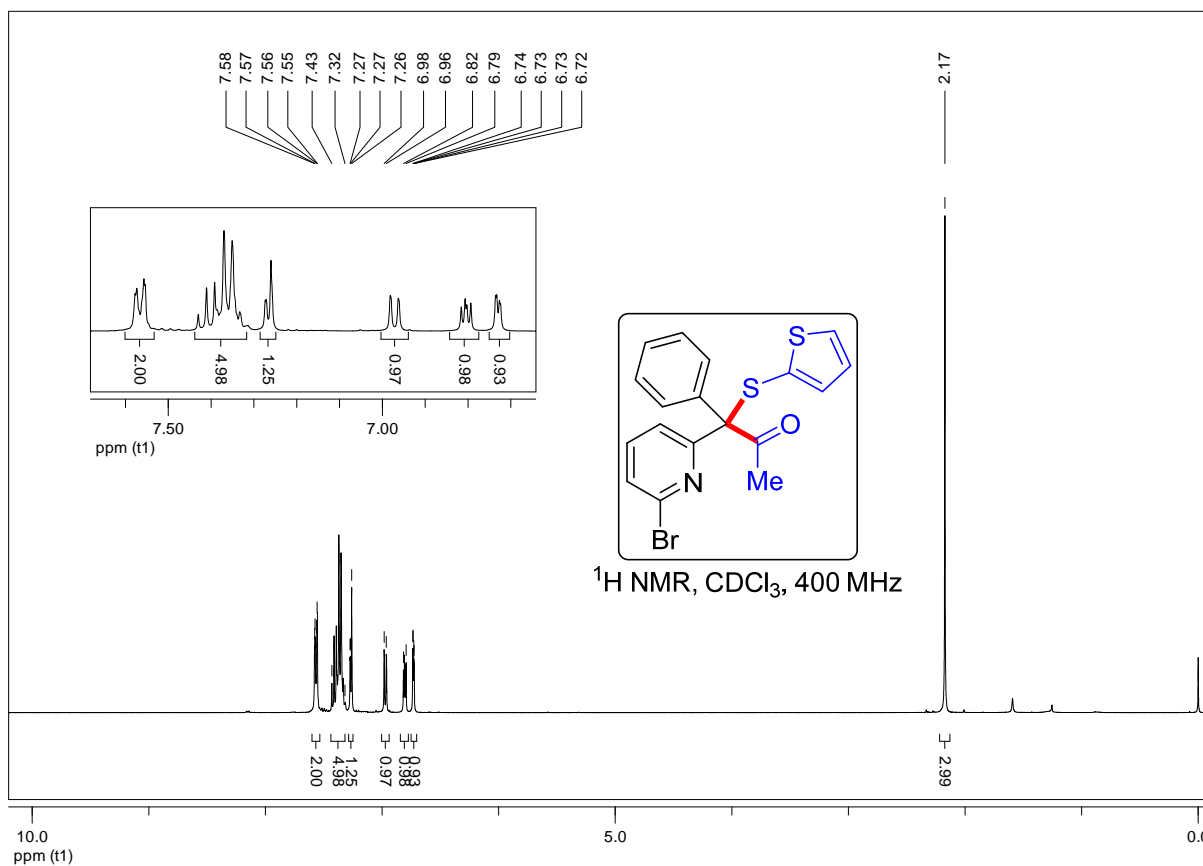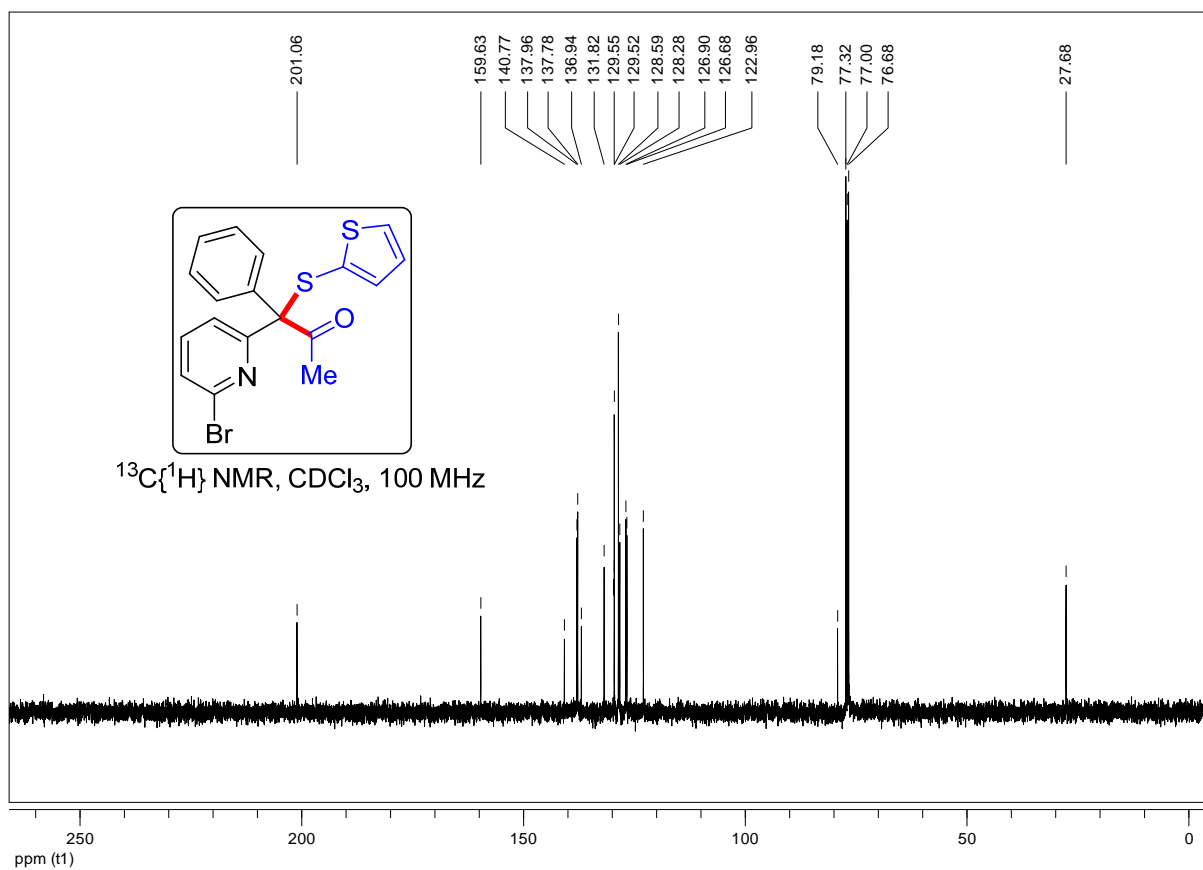

**1-(6-bromopyridin-2-yl)-1-((4-chlorobenzyl)thio)-1-phenylpropan-2-one (3at)**

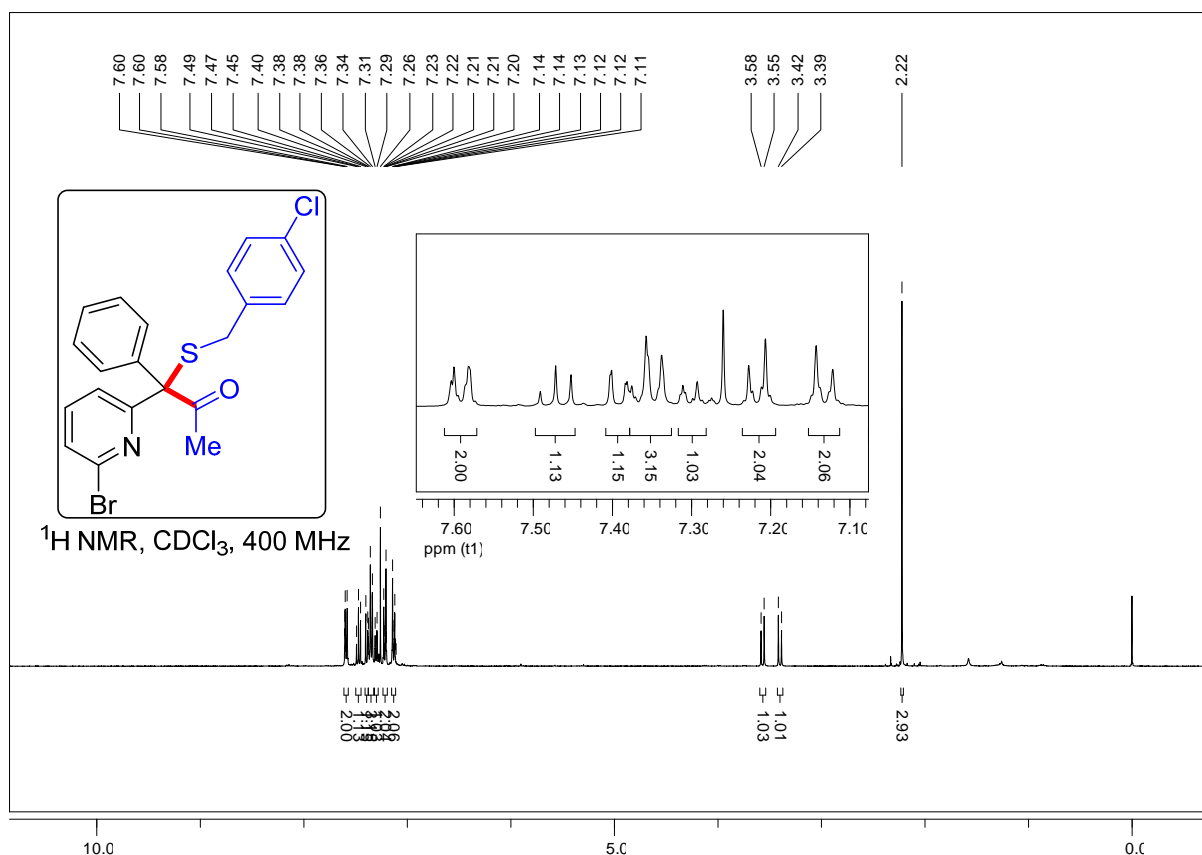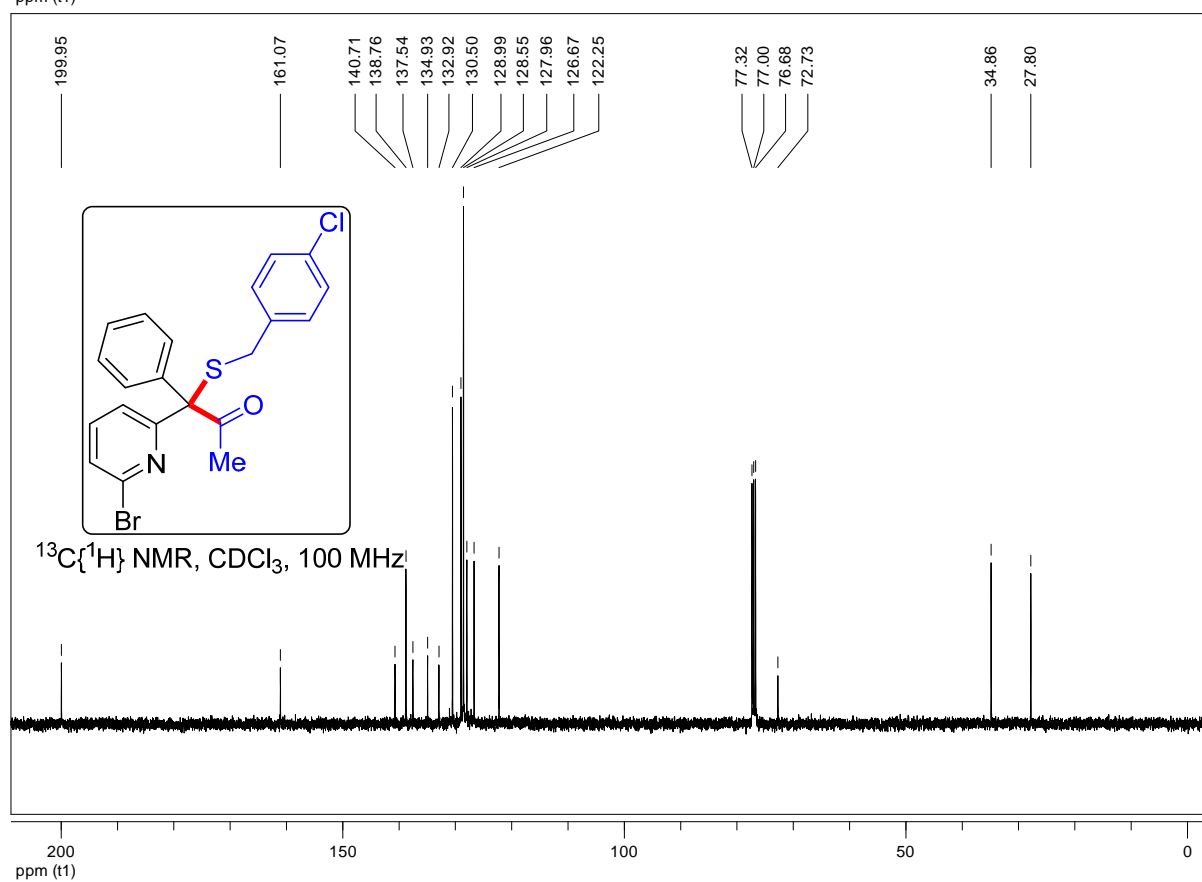

**methyl 2-((1-(6-bromopyridin-2-yl)-2-oxo-1-phenylpropyl)thio)acetate (3au)**

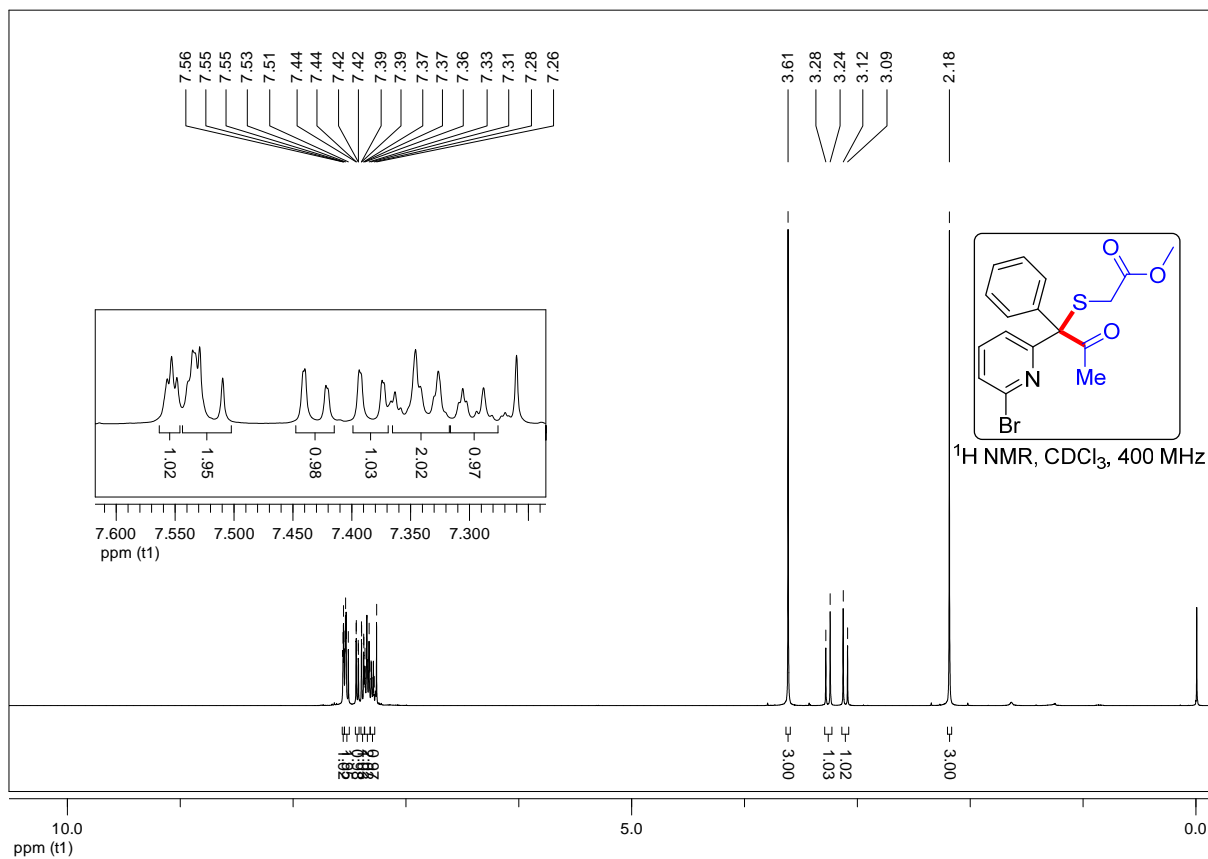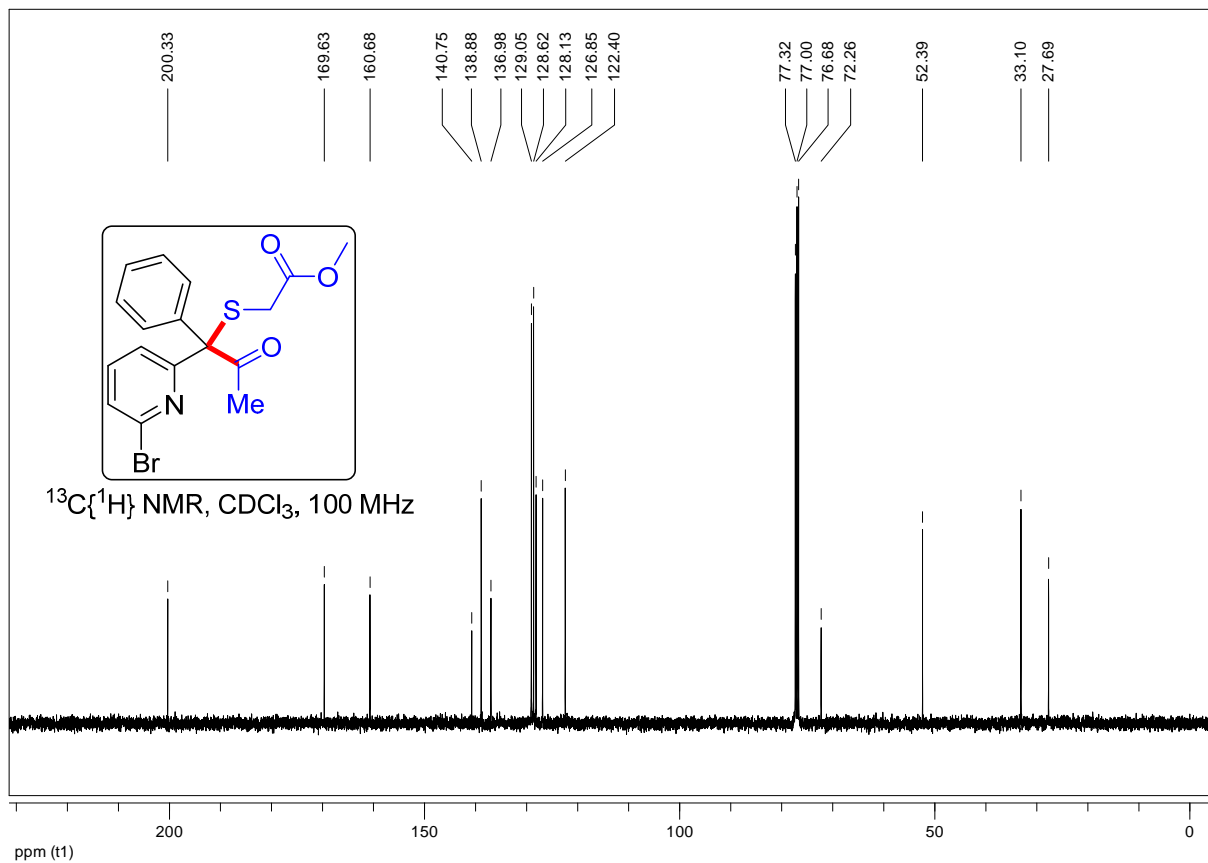

# 1-(6-bromopyridin-2-yl)-1-((furan-2-ylmethyl)thio)-1-phenylpropan-2-one

(3av)

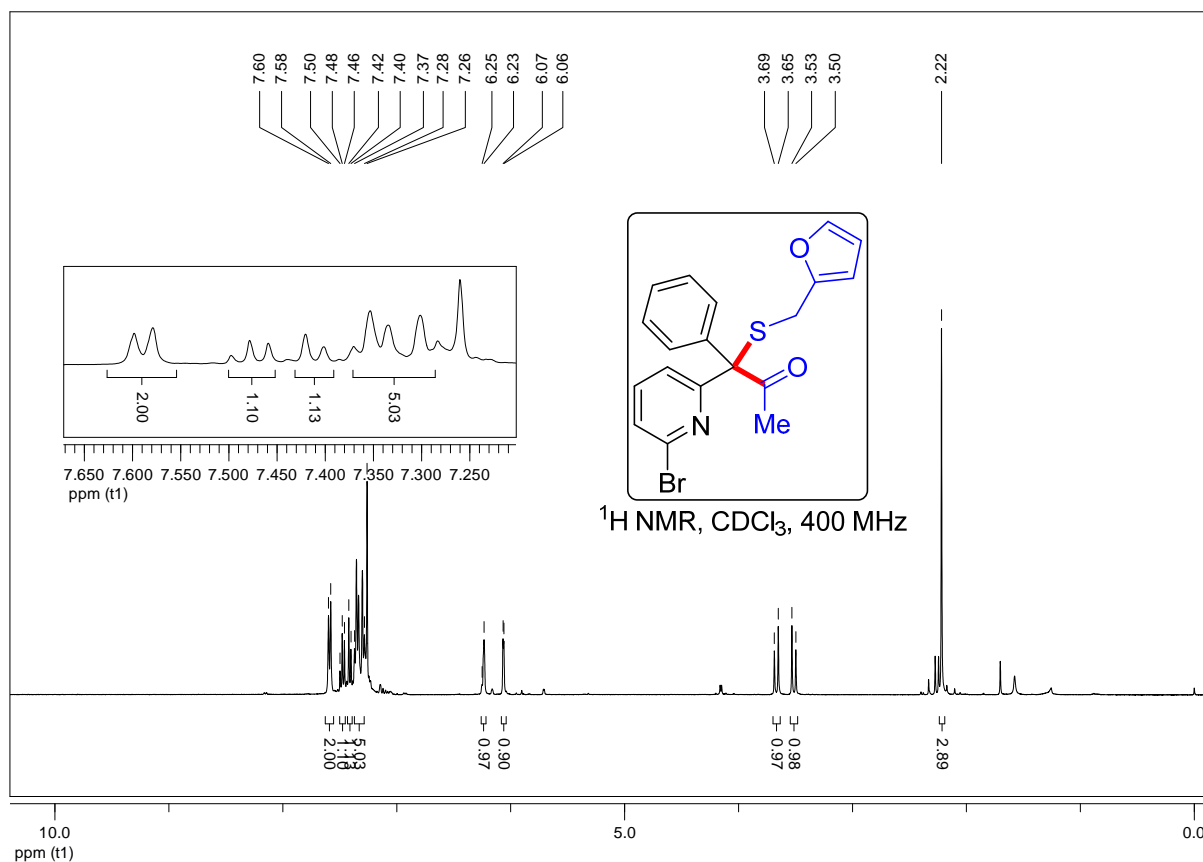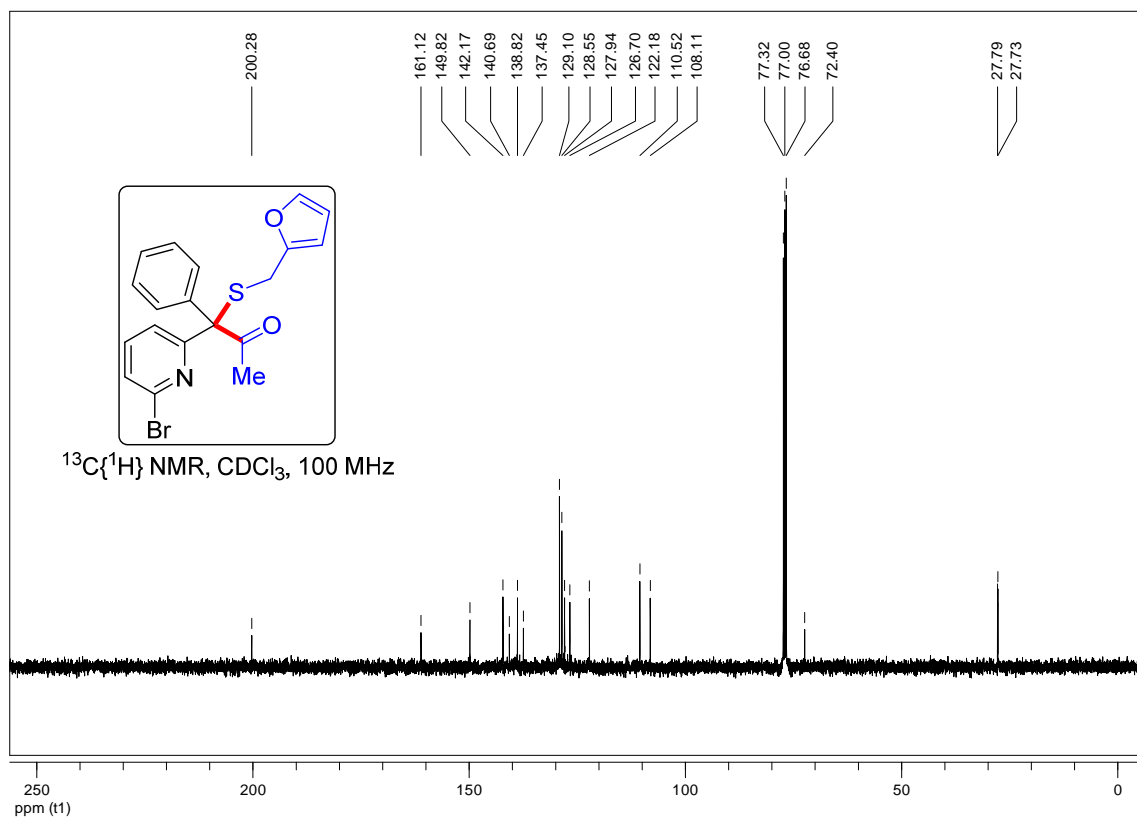

## 2-(6-bromopyridin-2-yl)-2-(methylthio)-1,2-diphenylethan-1-one (3aw)

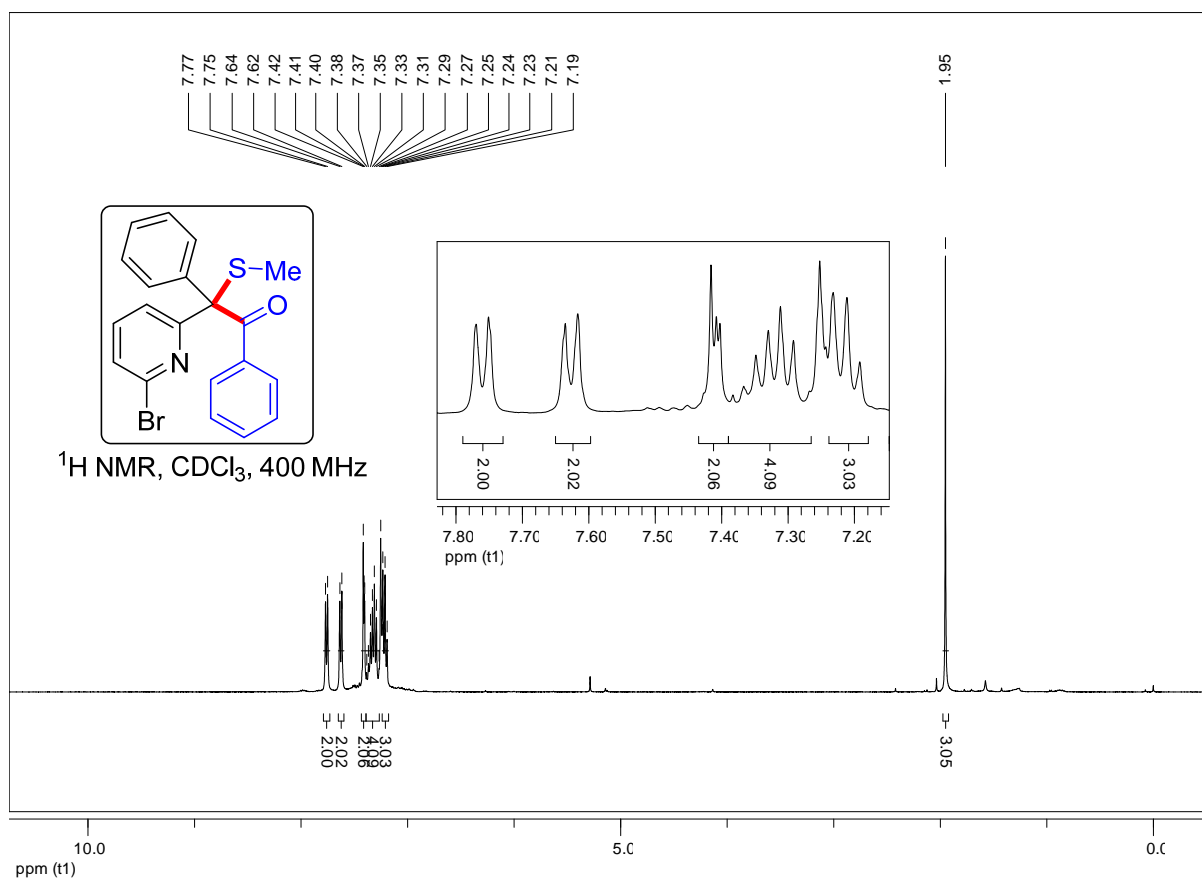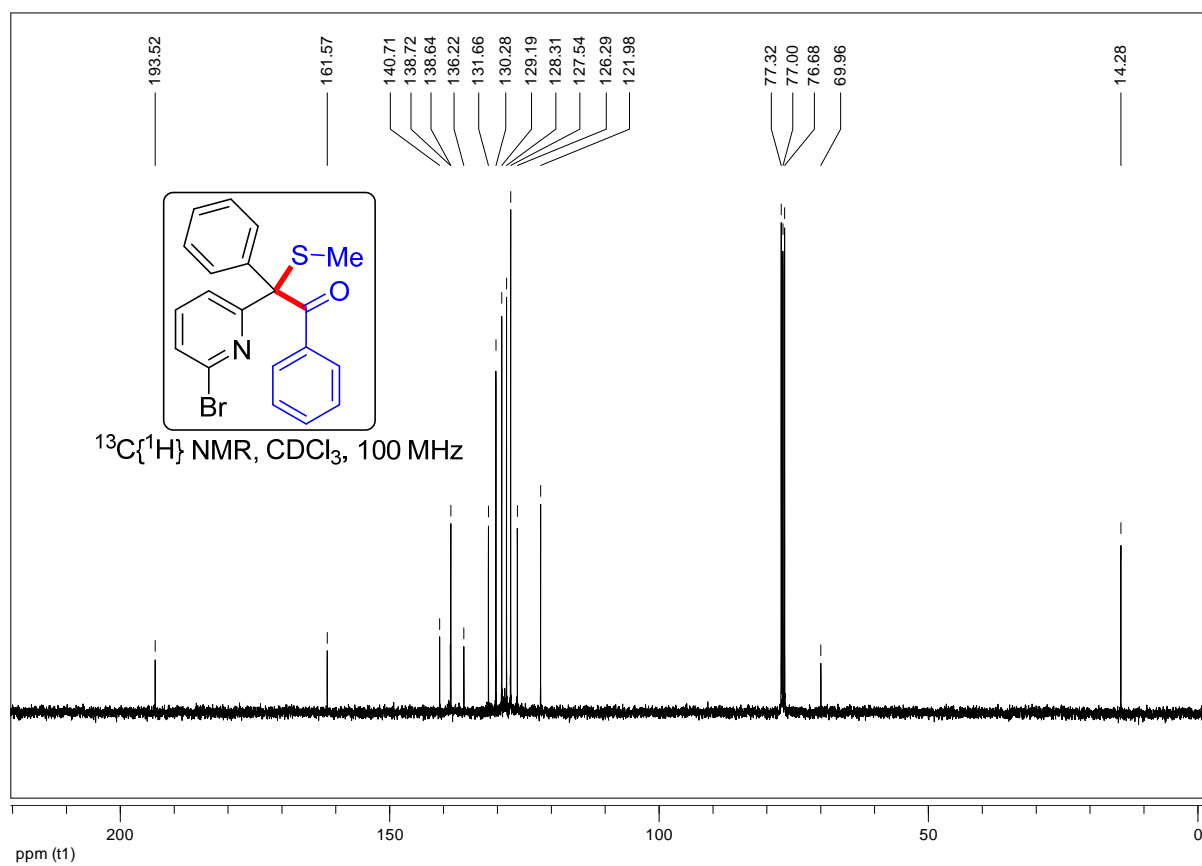

# 1-((1-(6-bromopyridin-2-yl)-2-oxo-1,2-diphenylethyl)thio)pentan-3-one (3ax)

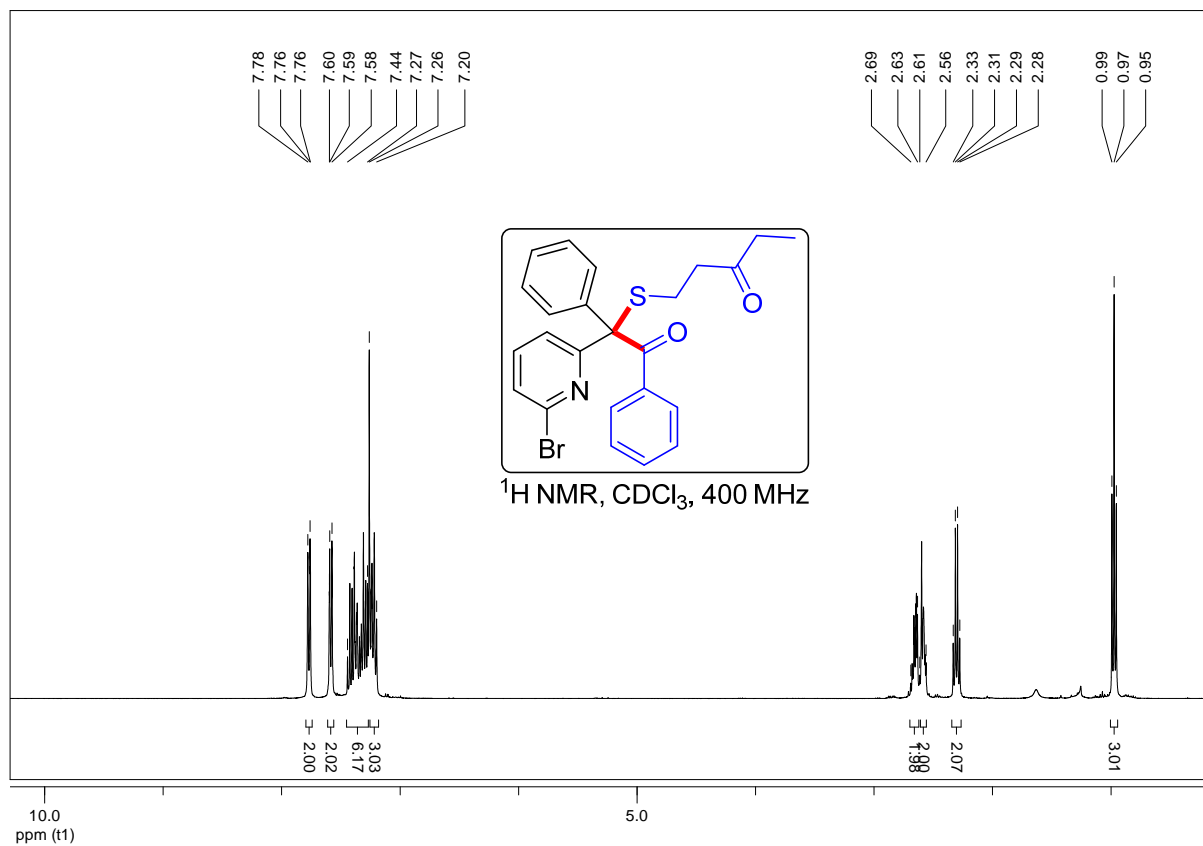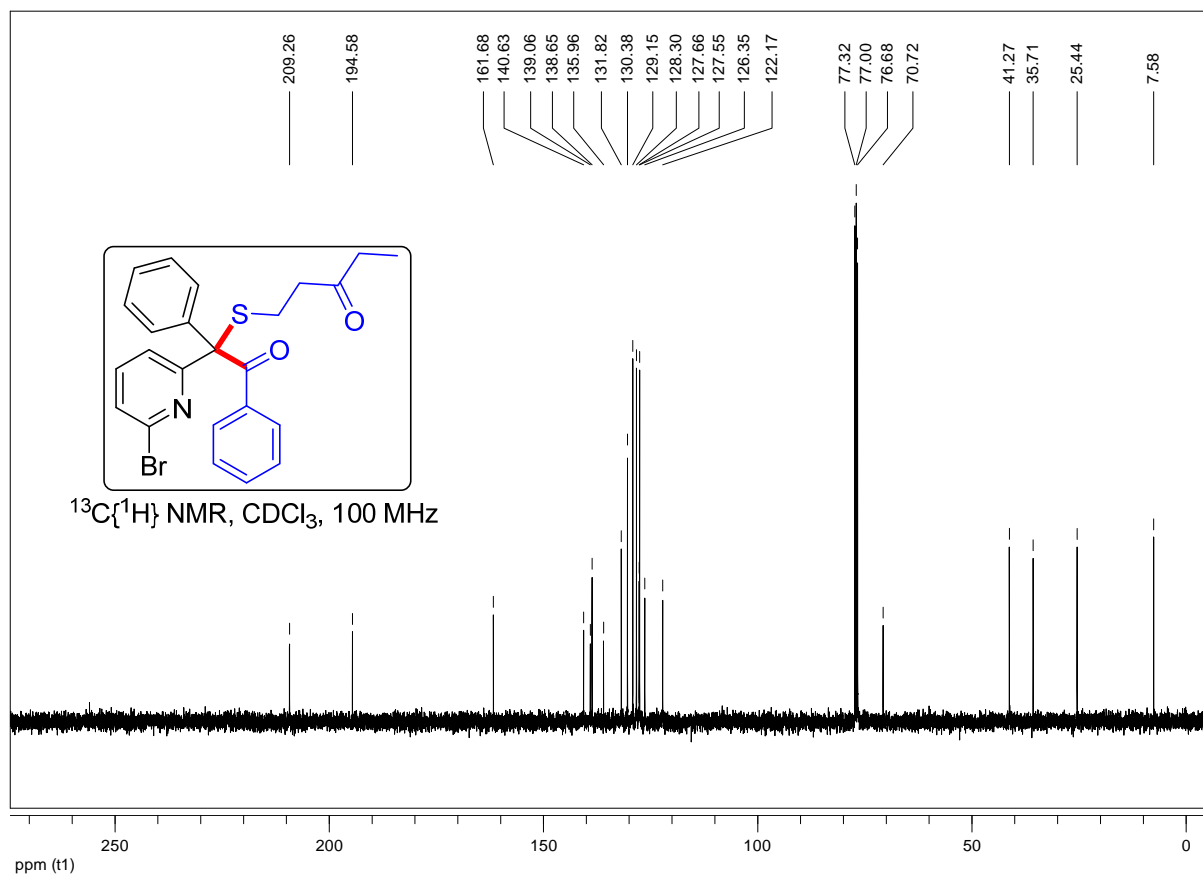



# 1-(6-bromopyridin-2-yl)-1-phenyl-1-(prop-2-yn-1-ylthio)propan-2-one (3ay)

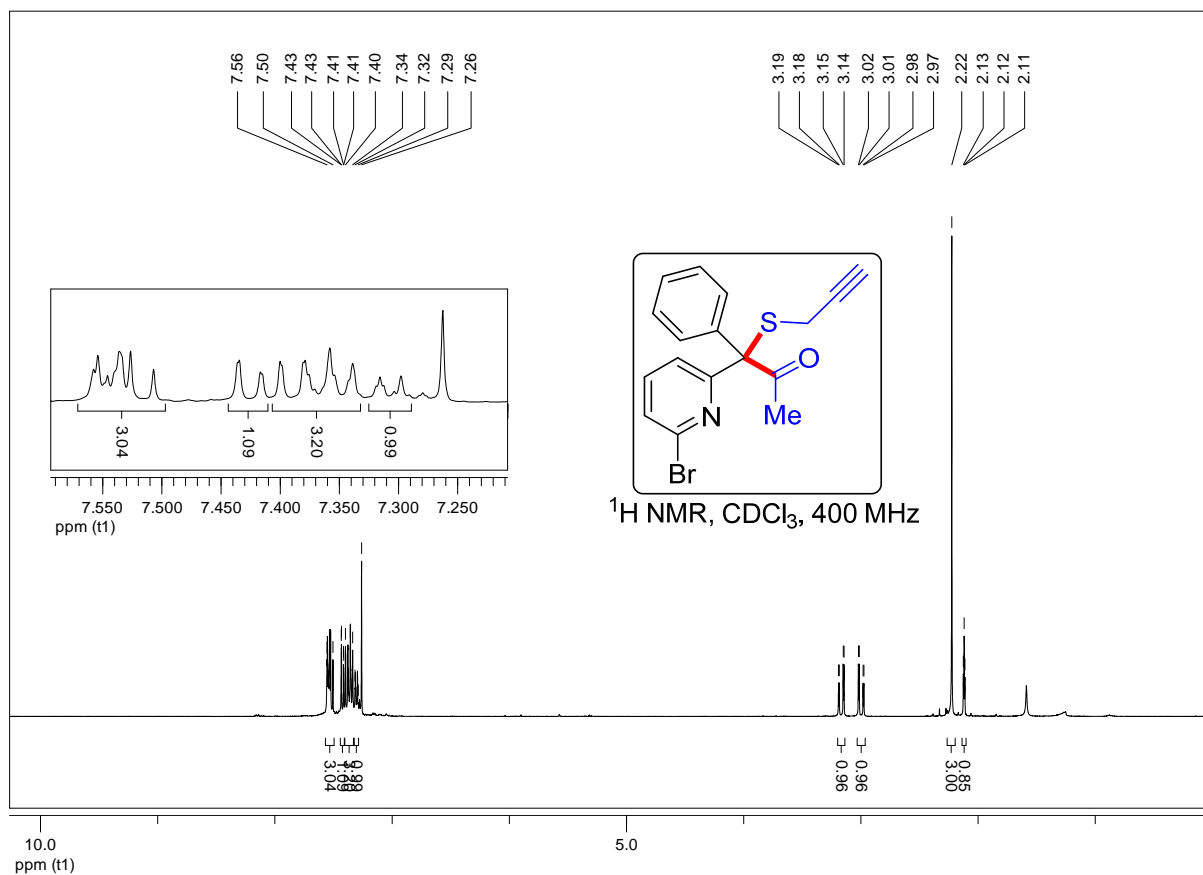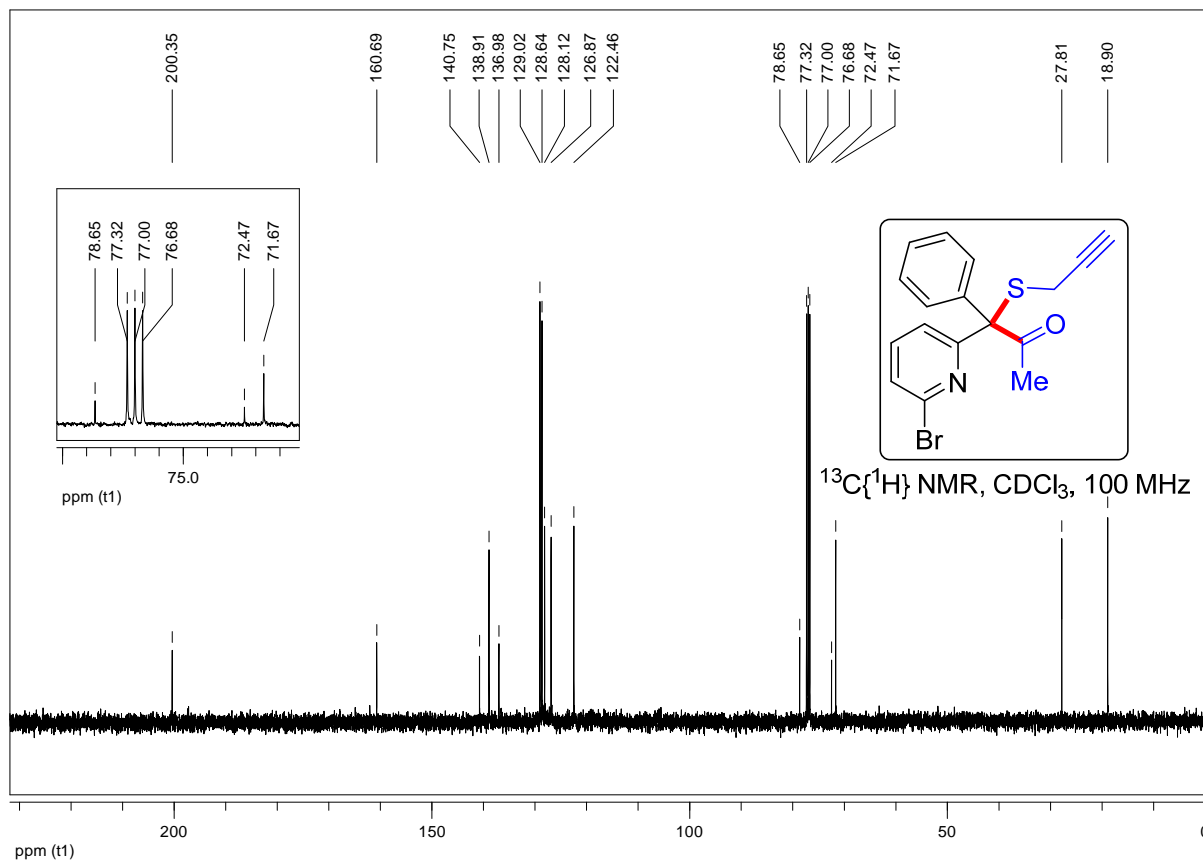

**2-(6-bromopyridin-2-yl)-1,2-diphenyl-2-(prop-2-yn-1-ylthio)ethan-1-one (3az)**

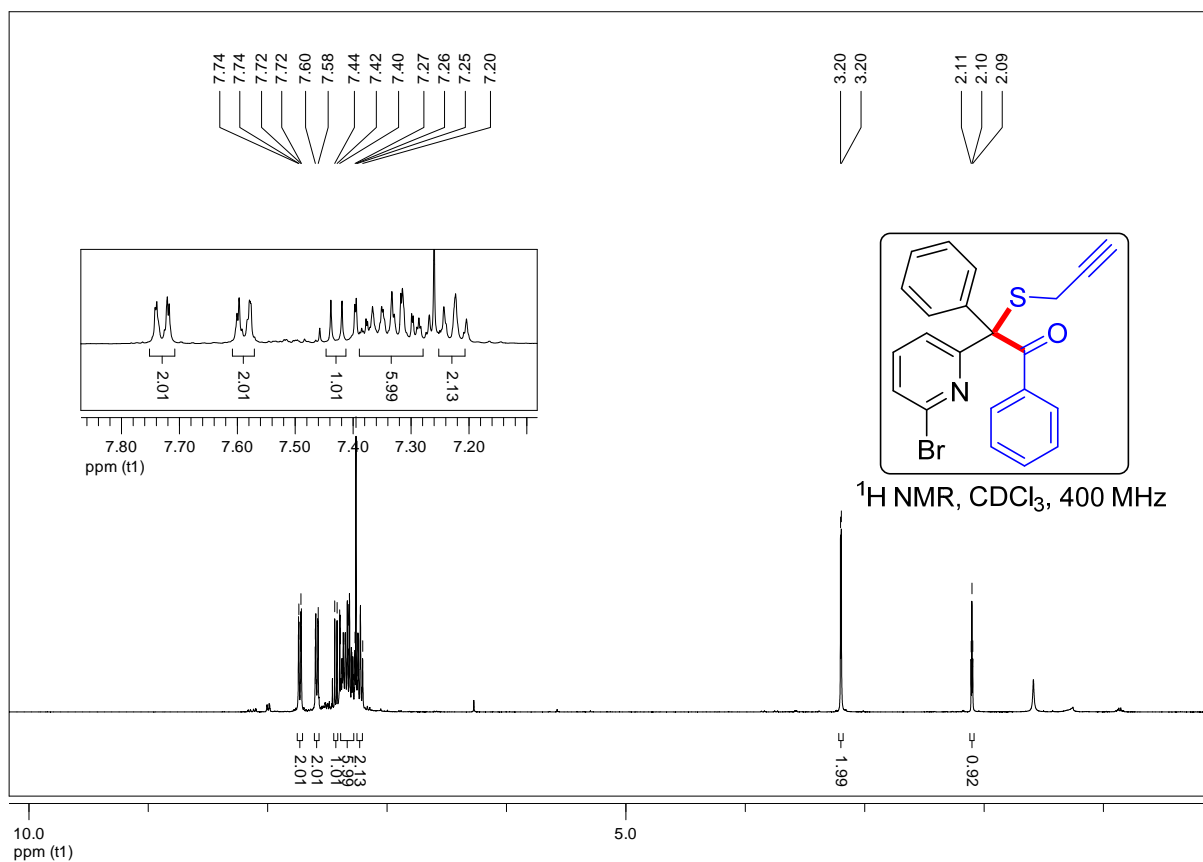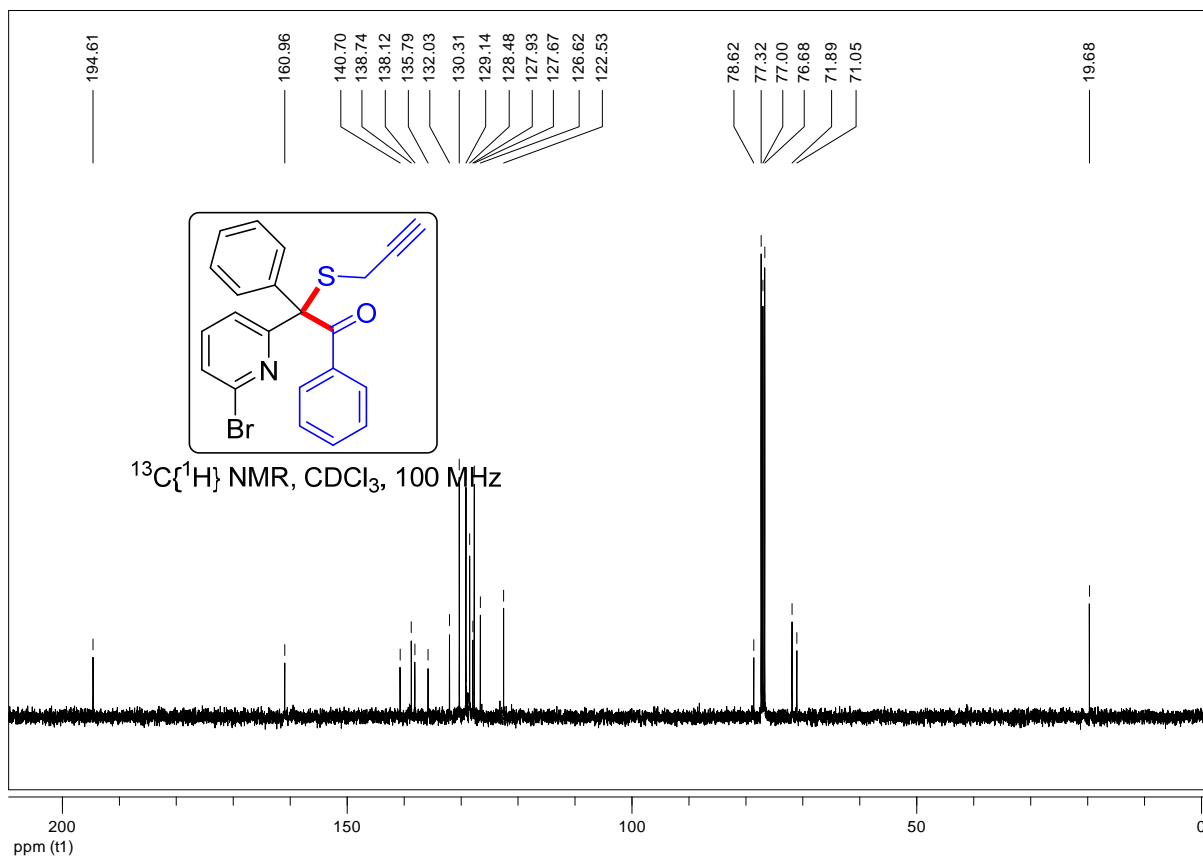

## 2-(allylthio)-2-(6-bromopyridin-2-yl)-1,2-diphenylethan-1-one (3za)

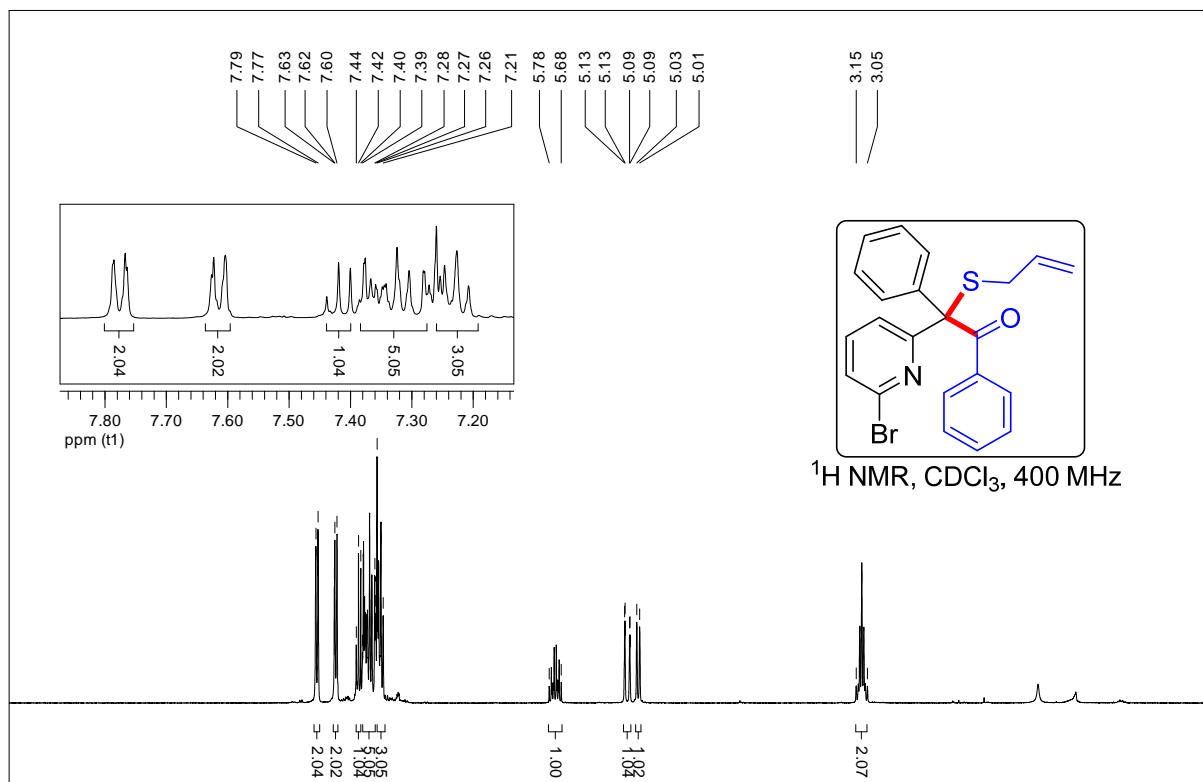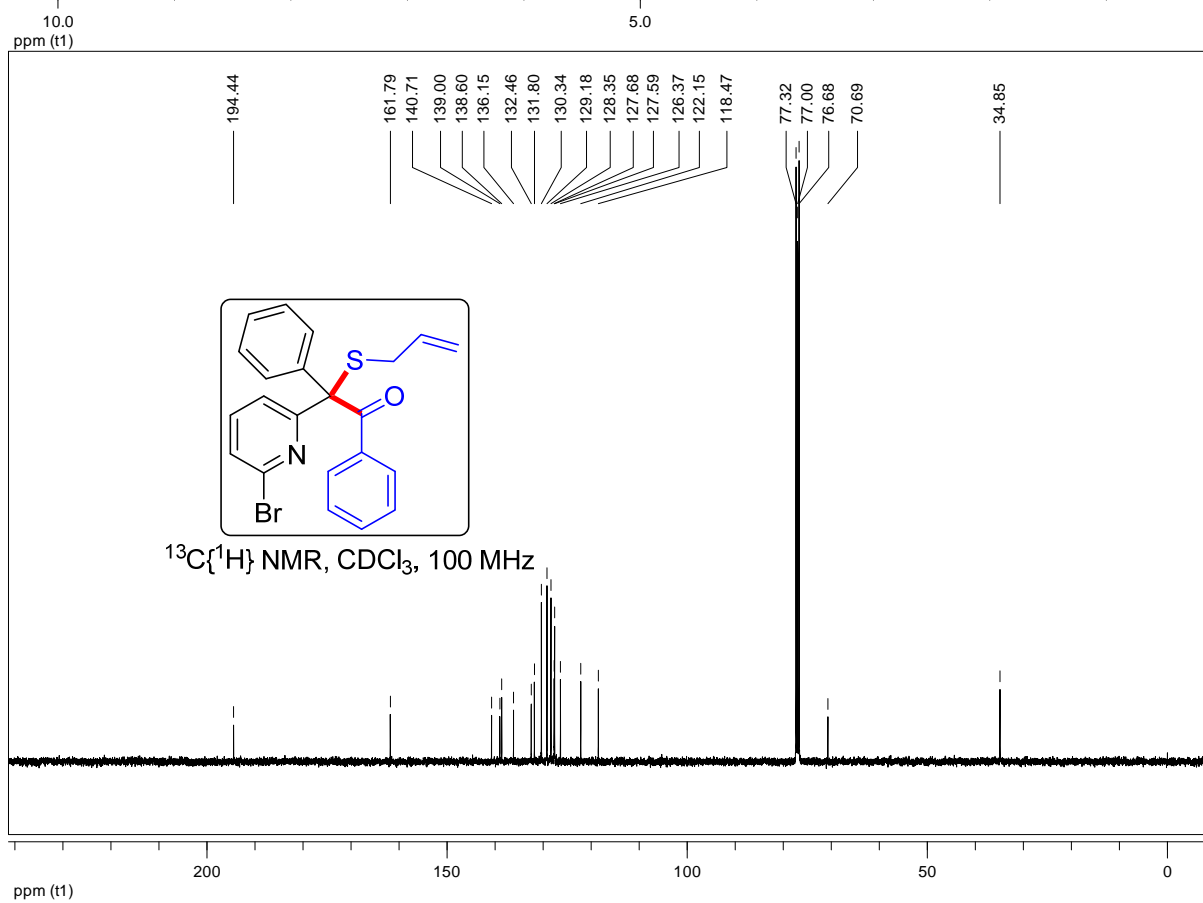

## 2-(allylthio)-2-(6-bromopyridin-2-yl)-1,2-diphenylethan-1-one (3zb)

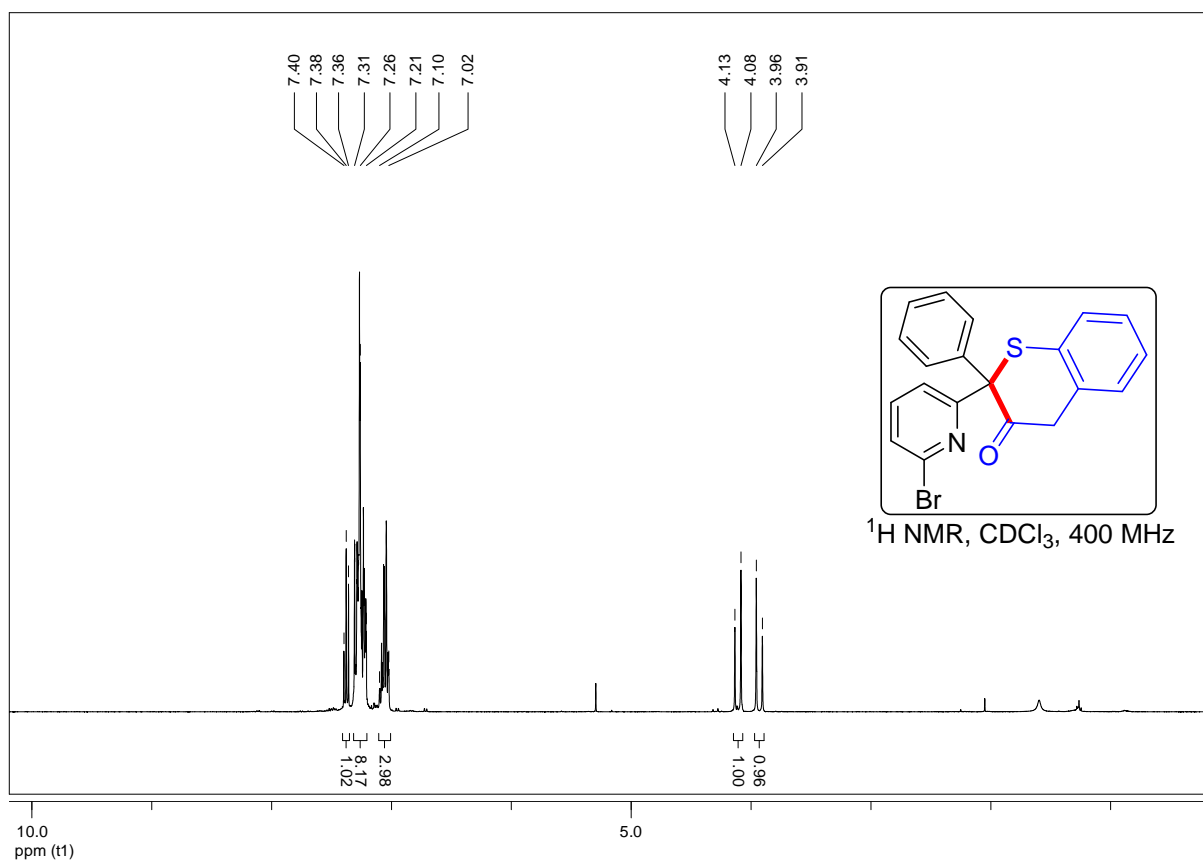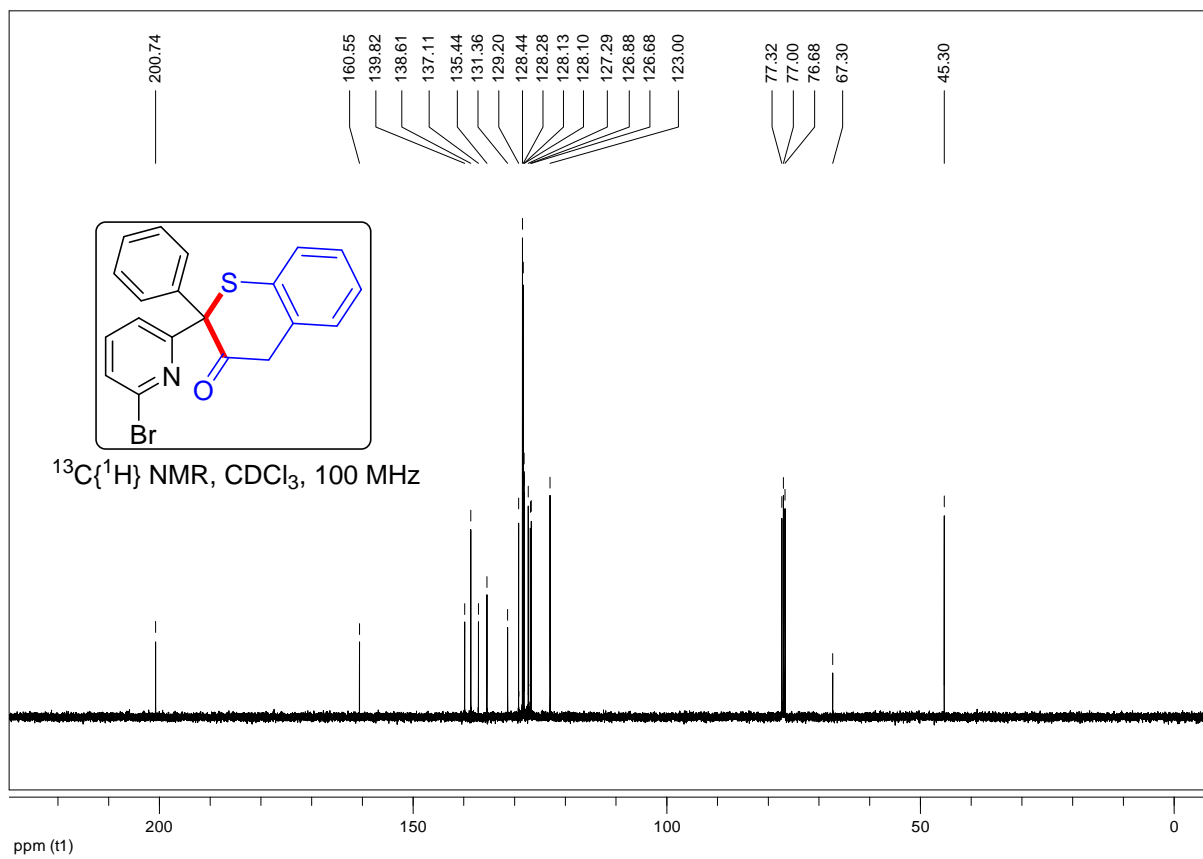

### 3-(6-bromopyridin-2-yl)-3-phenylisothiochroman-4-one (3zc)

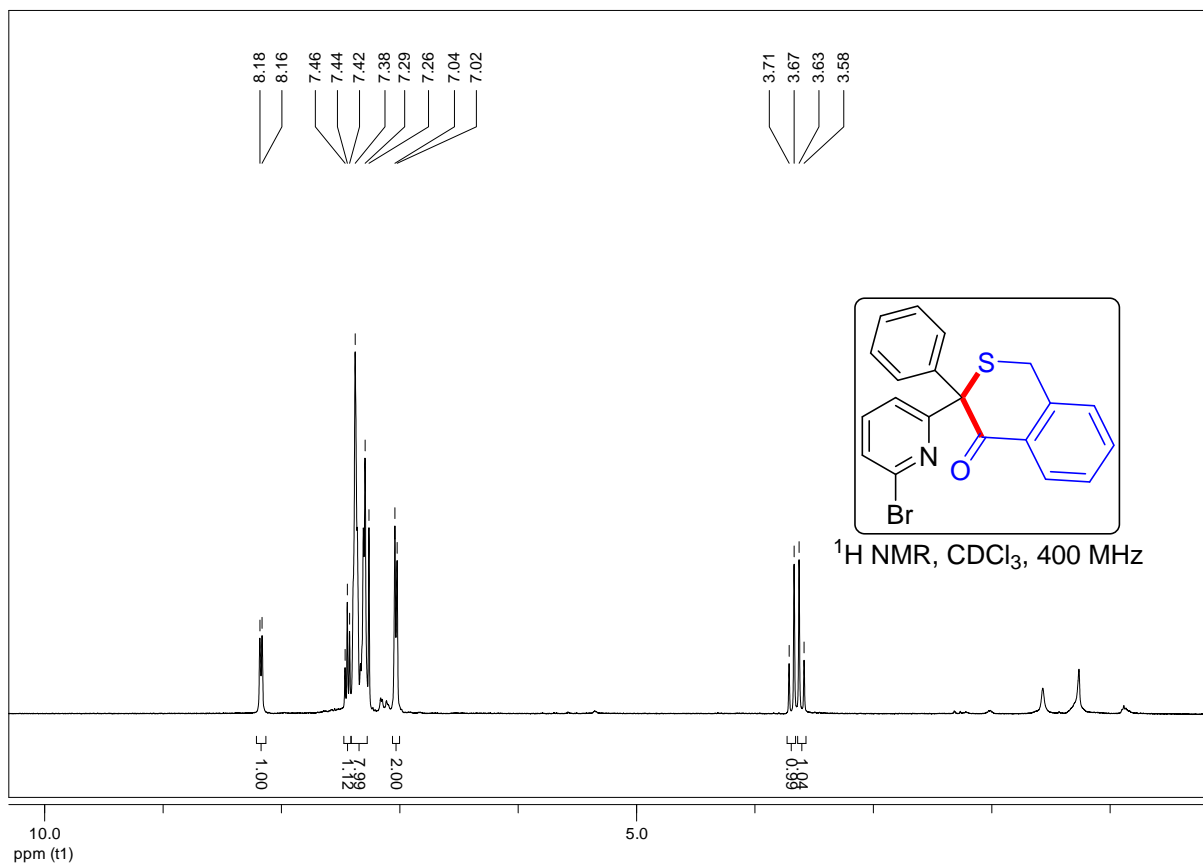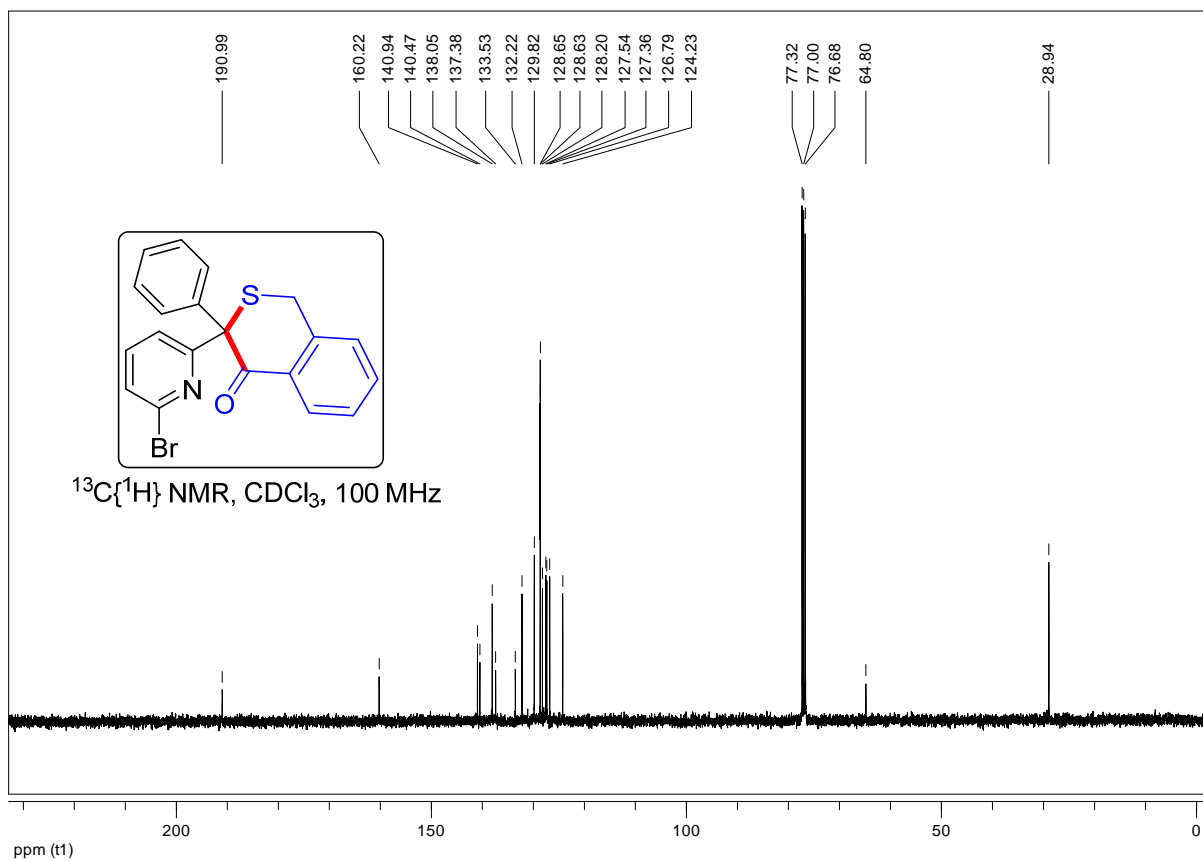

**1-((4-bromophenyl)thio)-1-(6-bromopyridin-2-yl)-1-phenylnonadecan-2-one (3zd)**

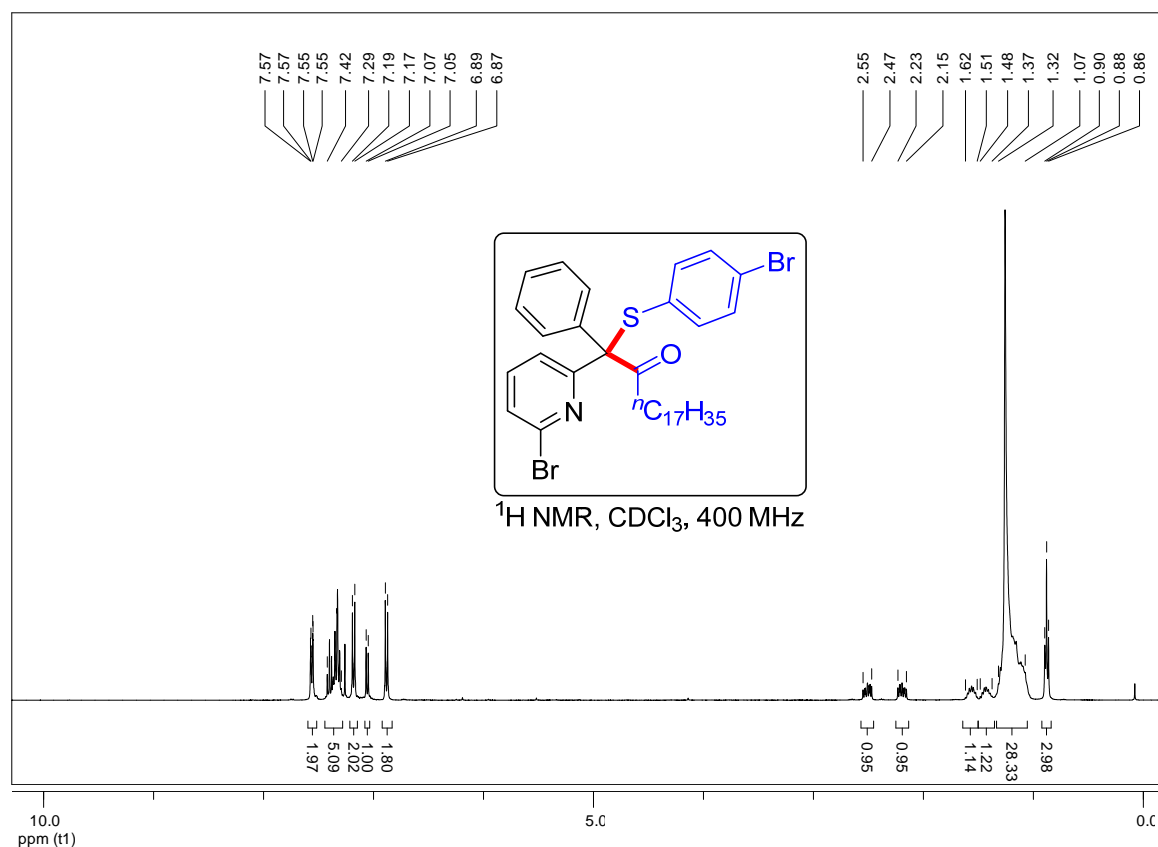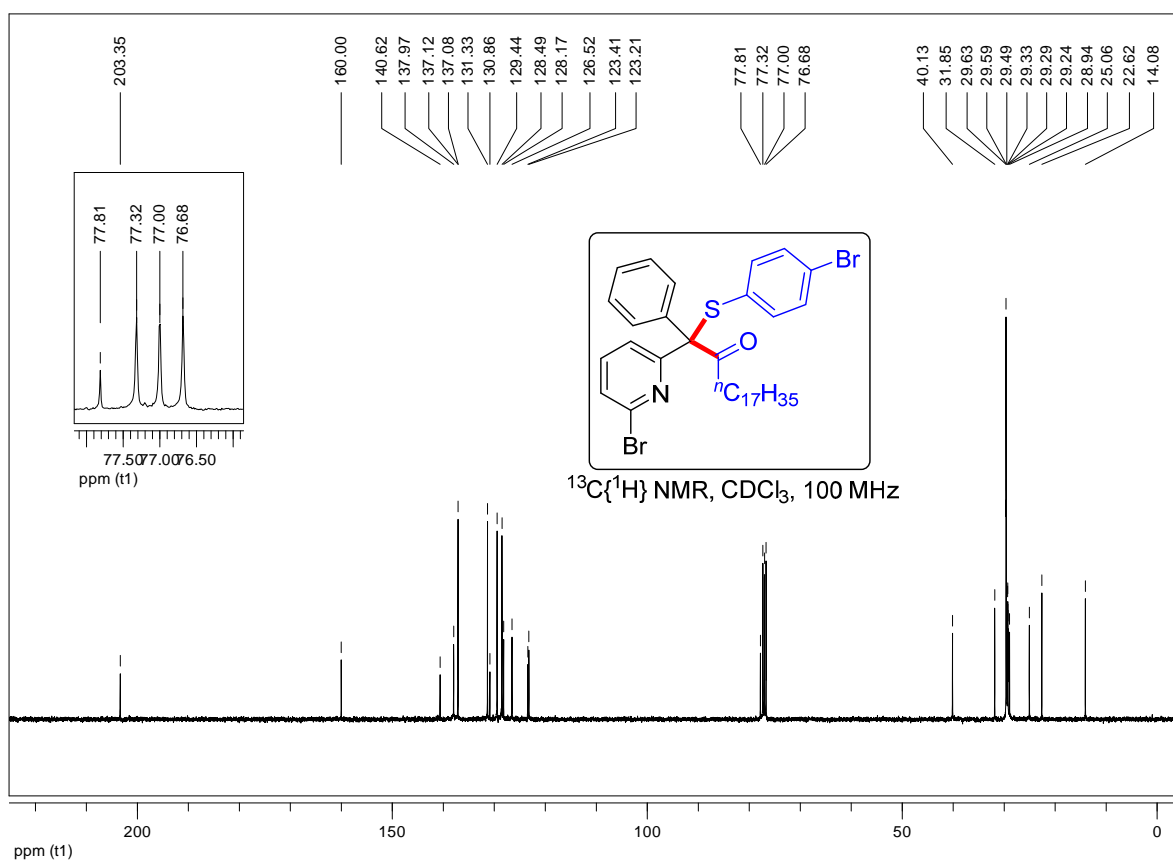



**1-((4-bromophenyl)thio)-1-(6-bromopyridin-2-yl)-4-(4,5-diphenyloxazol-2-yl)-1-phenylbutan-2-one (3zf)**

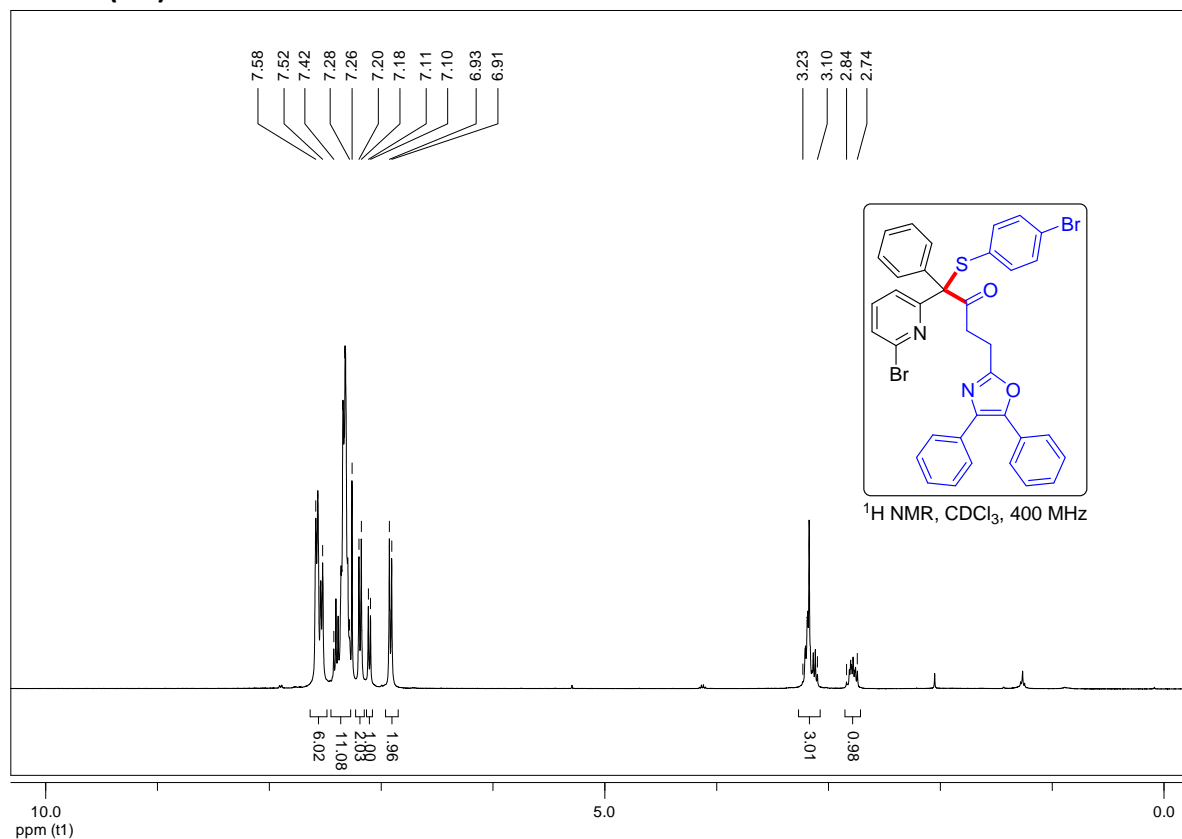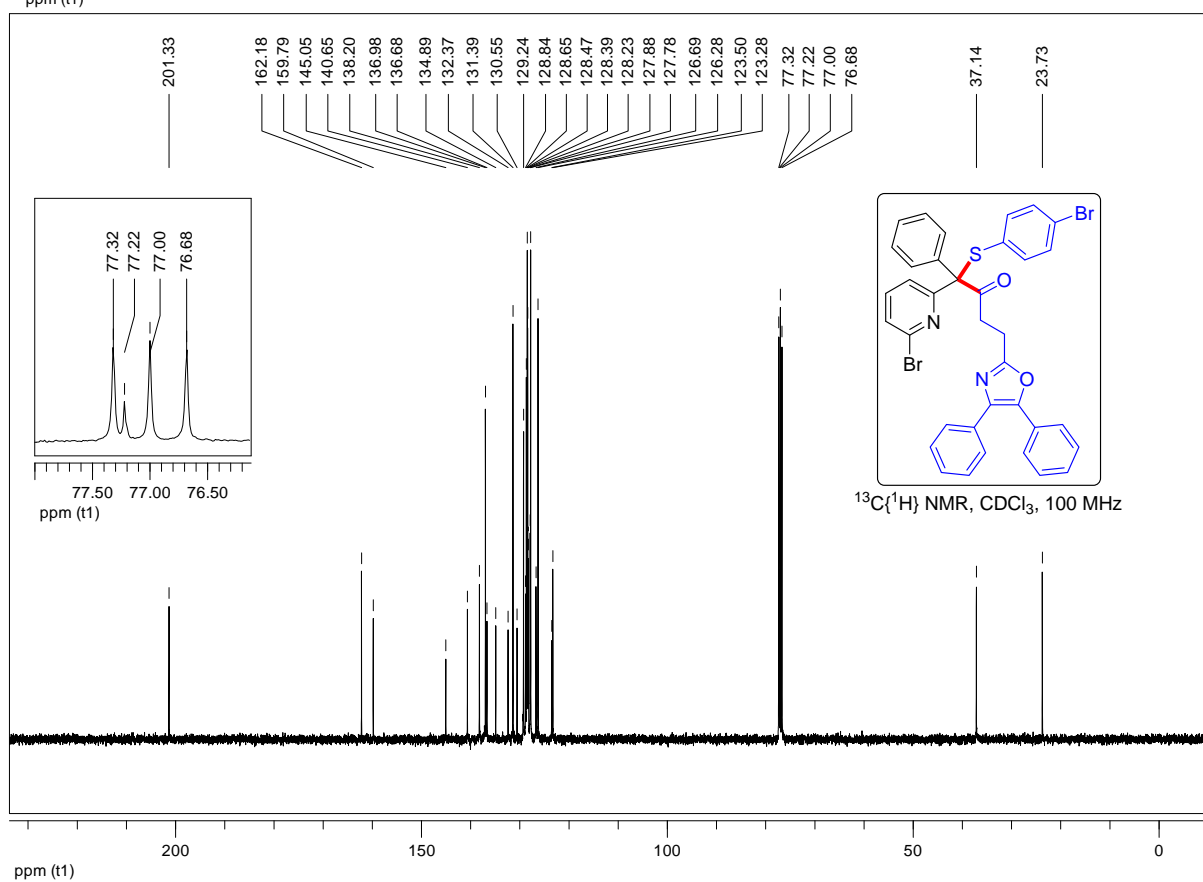



1-(6-bromopyridin-2-yl)-1-phenyl-1-(phenylselanyl)propan-2-one (3zg)

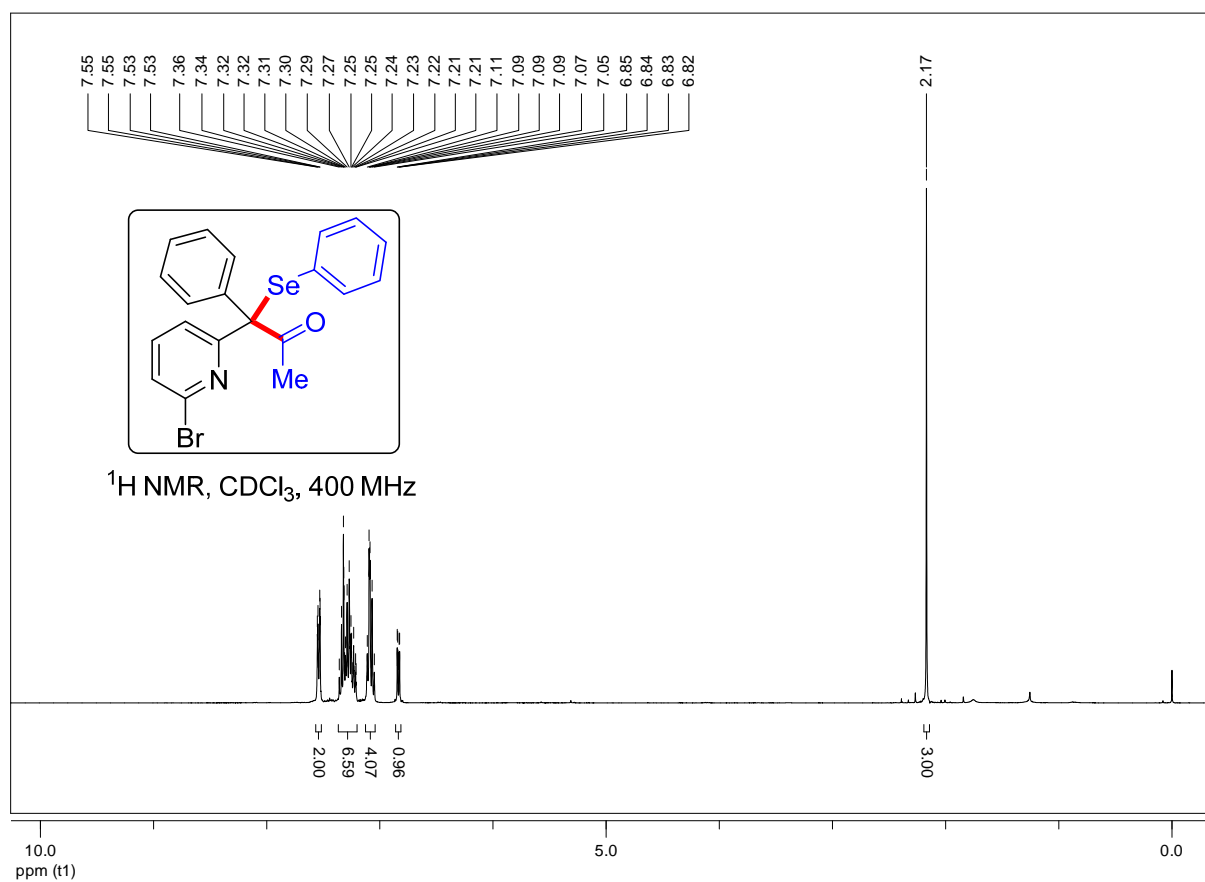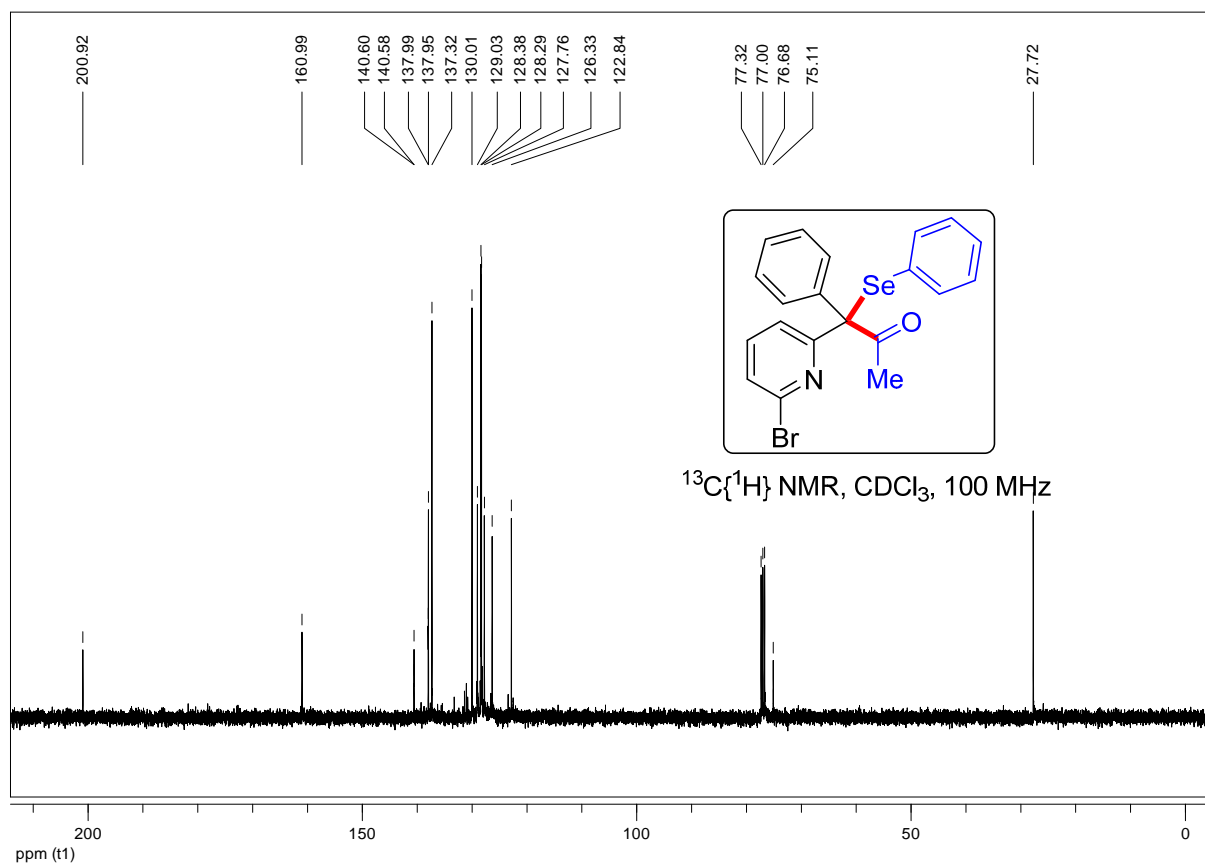

# 1-(6-bromopyridin-2-yl)-1-phenyl-1-(m-tolylthio)propan-2-one (3ba)

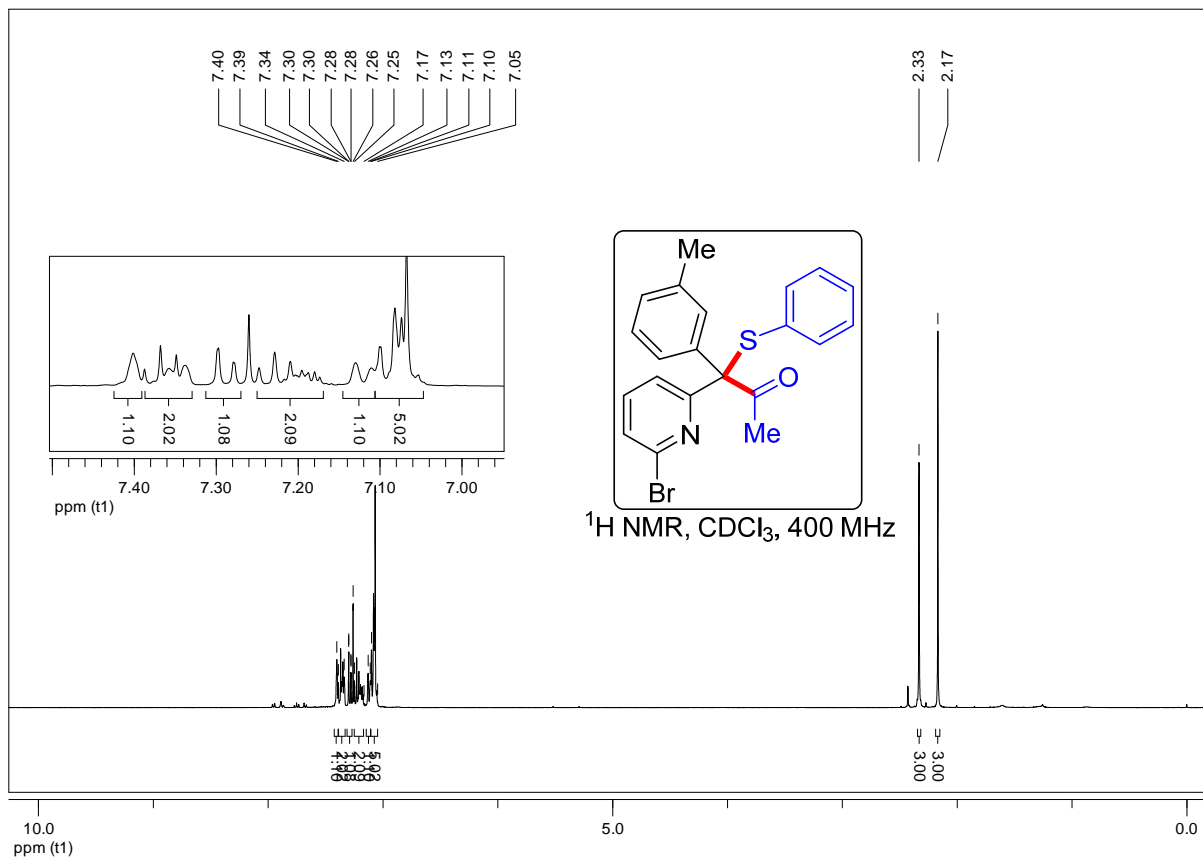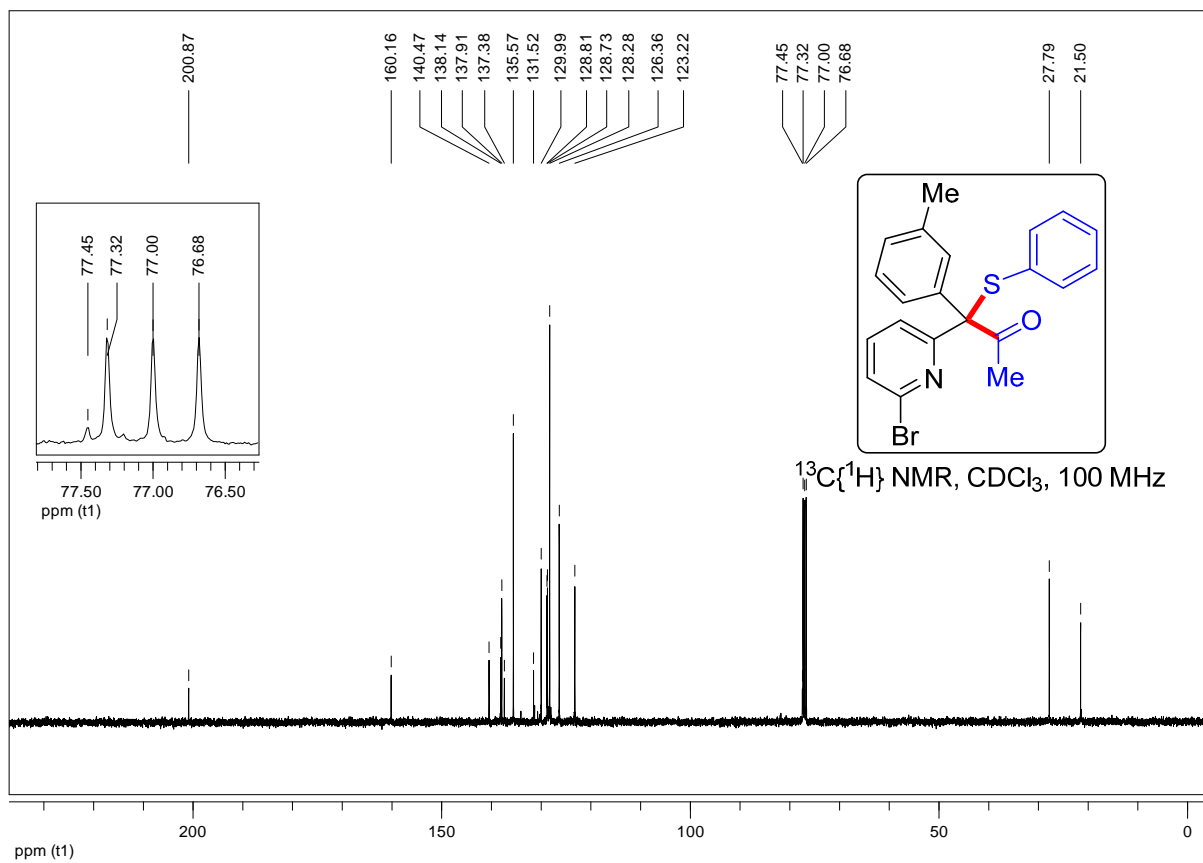

**1-(6-bromopyridin-2-yl)-1-phenyl-1-(p-tolylthio)propan-2-one (3ca)**

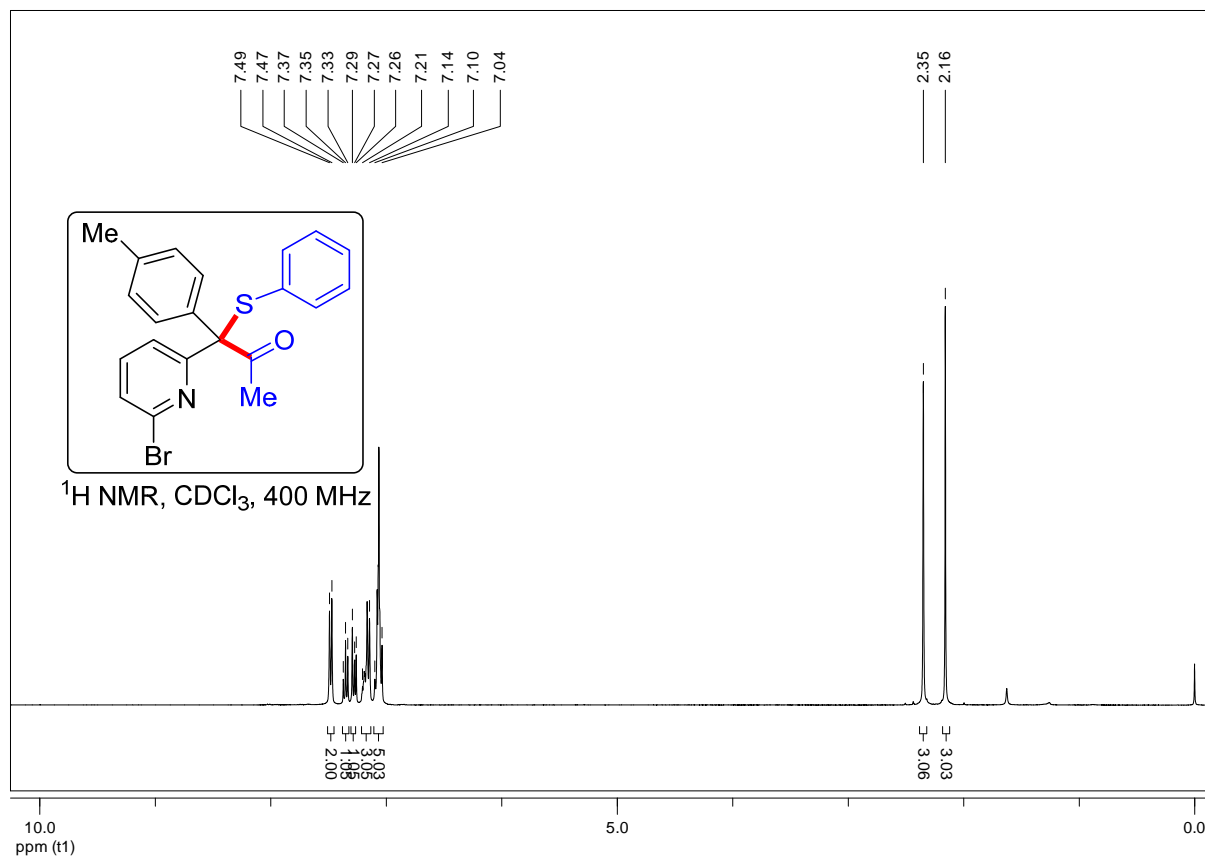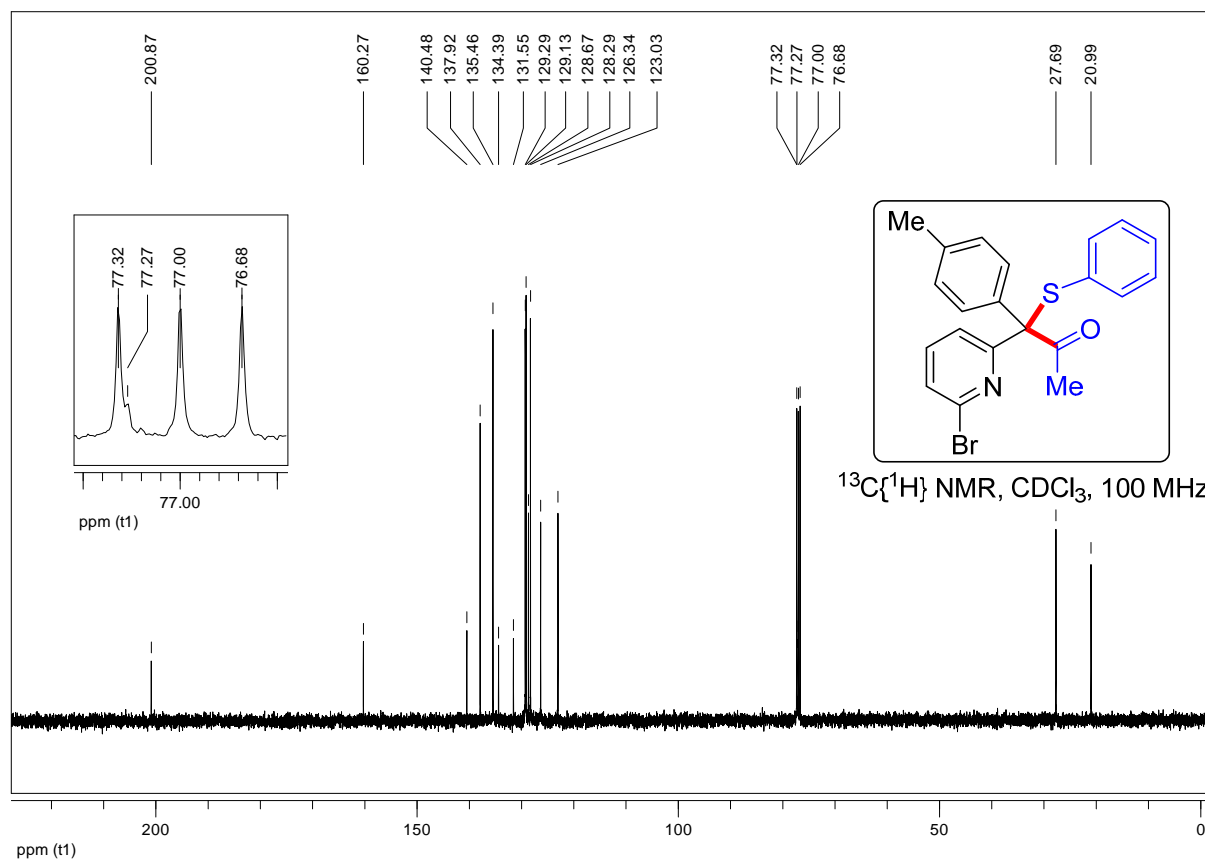

# 1-(6-bromopyridin-2-yl)-1-((4-methoxyphenyl)thio)-1-phenylpropan-2-one

(3da)

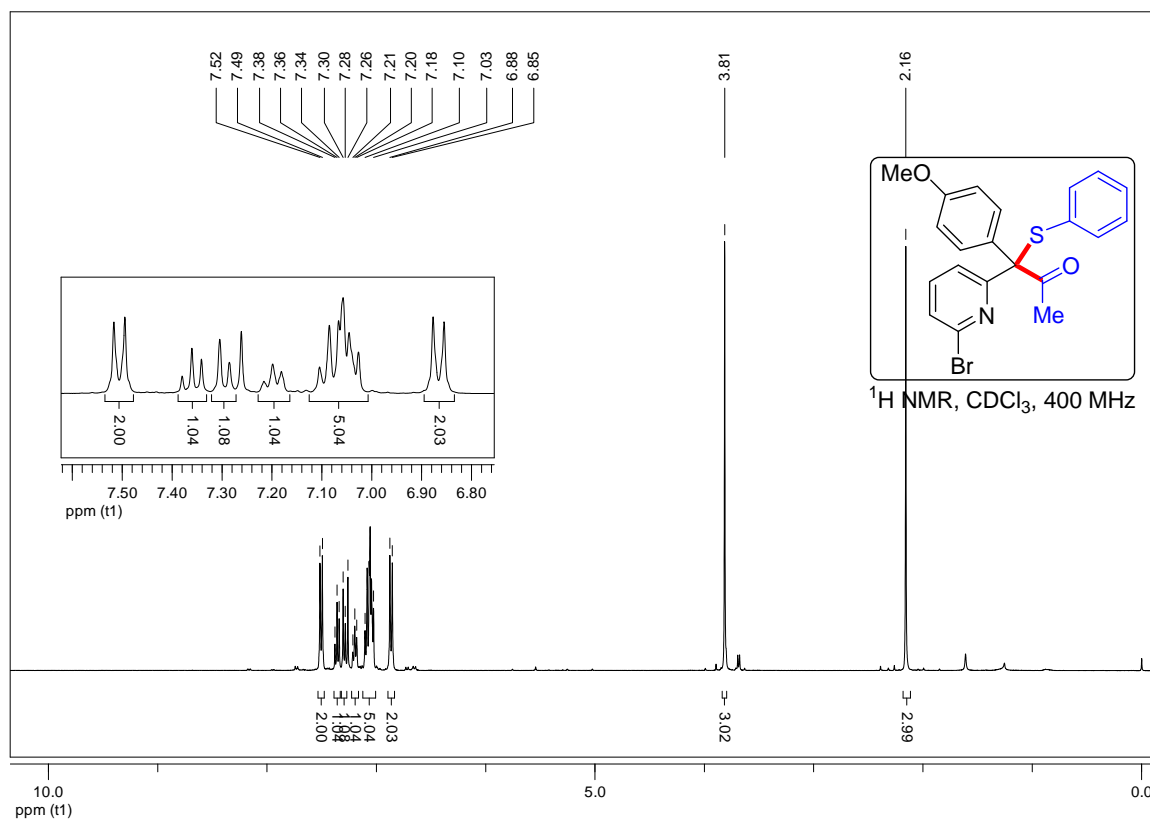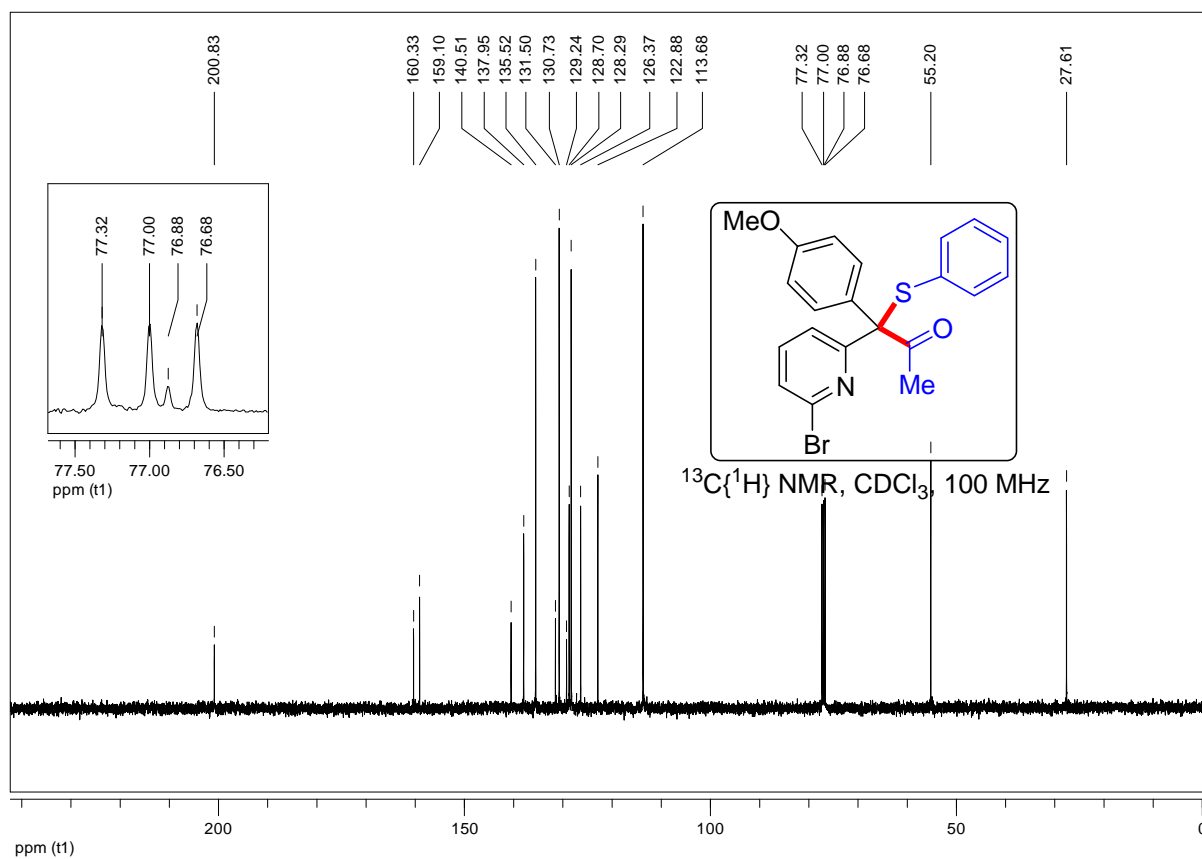

**1-(6-bromopyridin-2-yl)-1-phenyl-1-((4-(trifluoromethoxy)phenyl)thio)propan-2-one (3ea)**

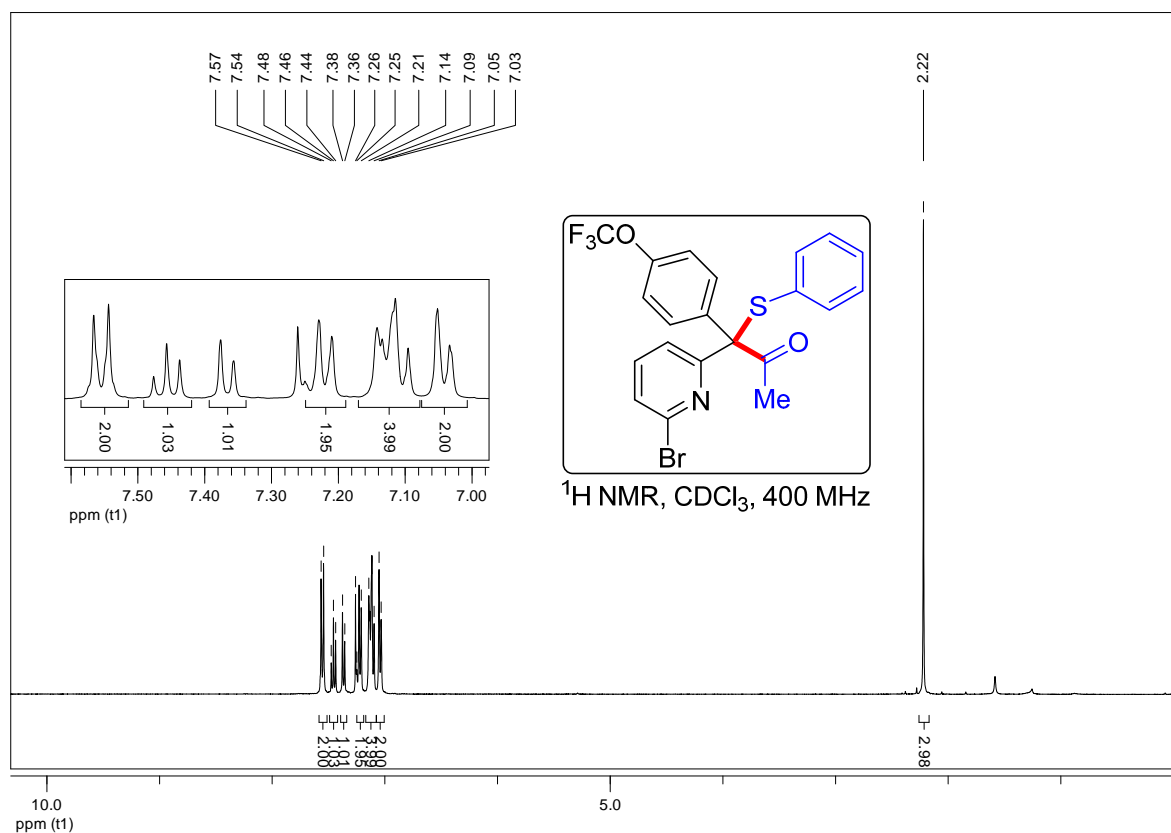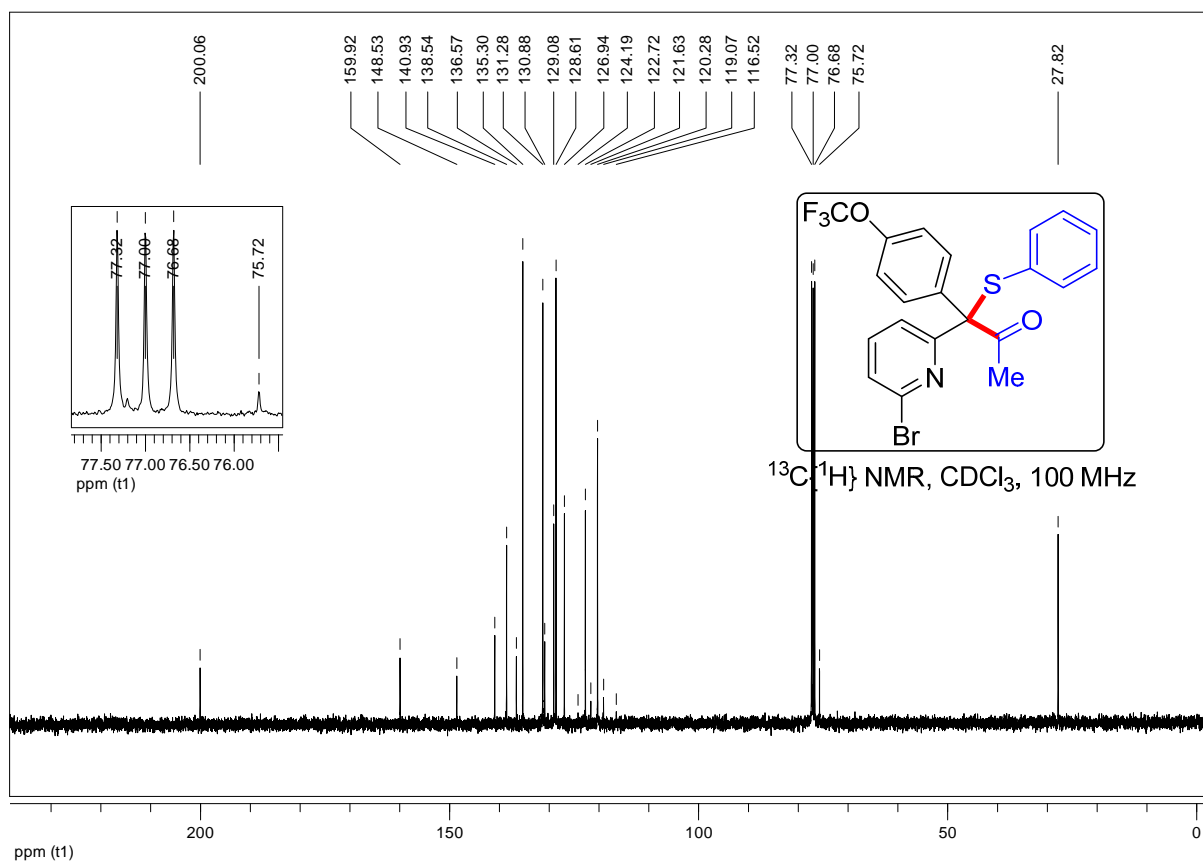

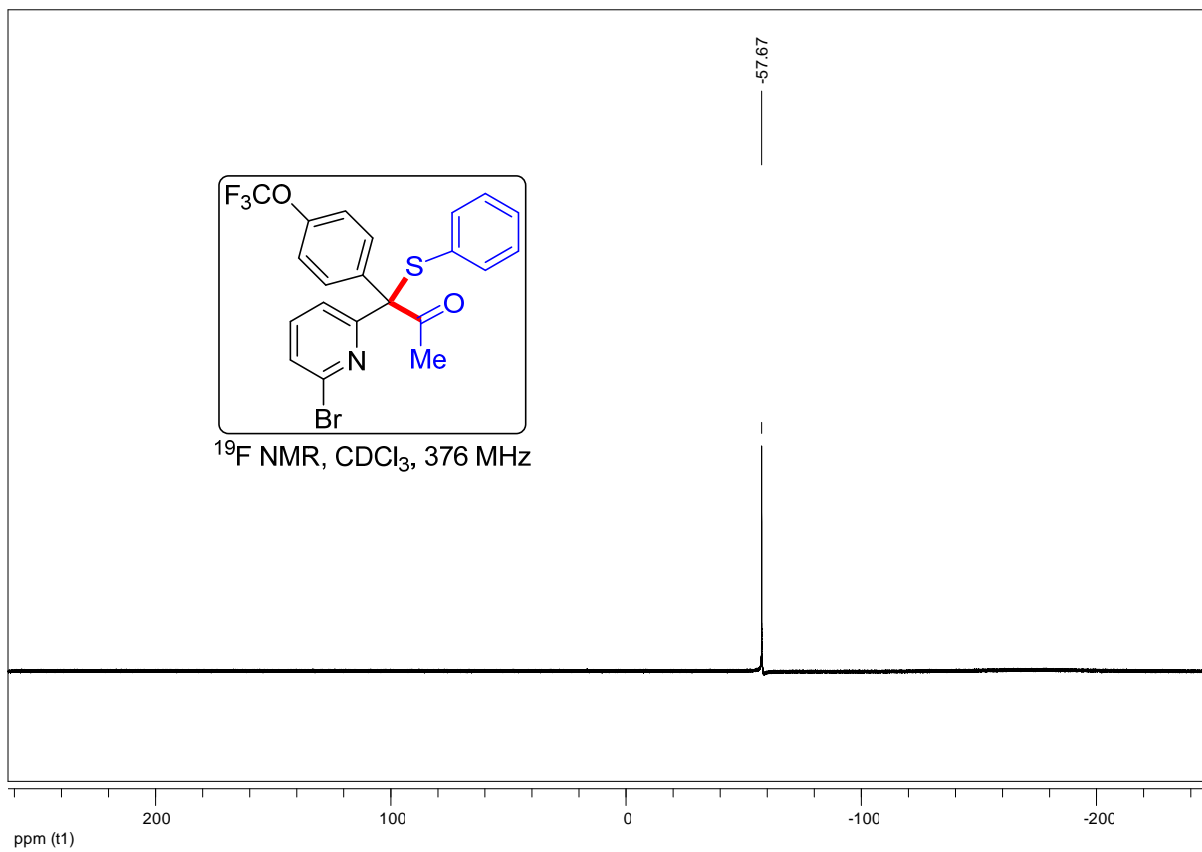

# 1-(6-bromopyridin-2-yl)-1-phenyl-1-((4-(trifluoromethyl)phenyl)thio)propan-2-

## -one (3fa)

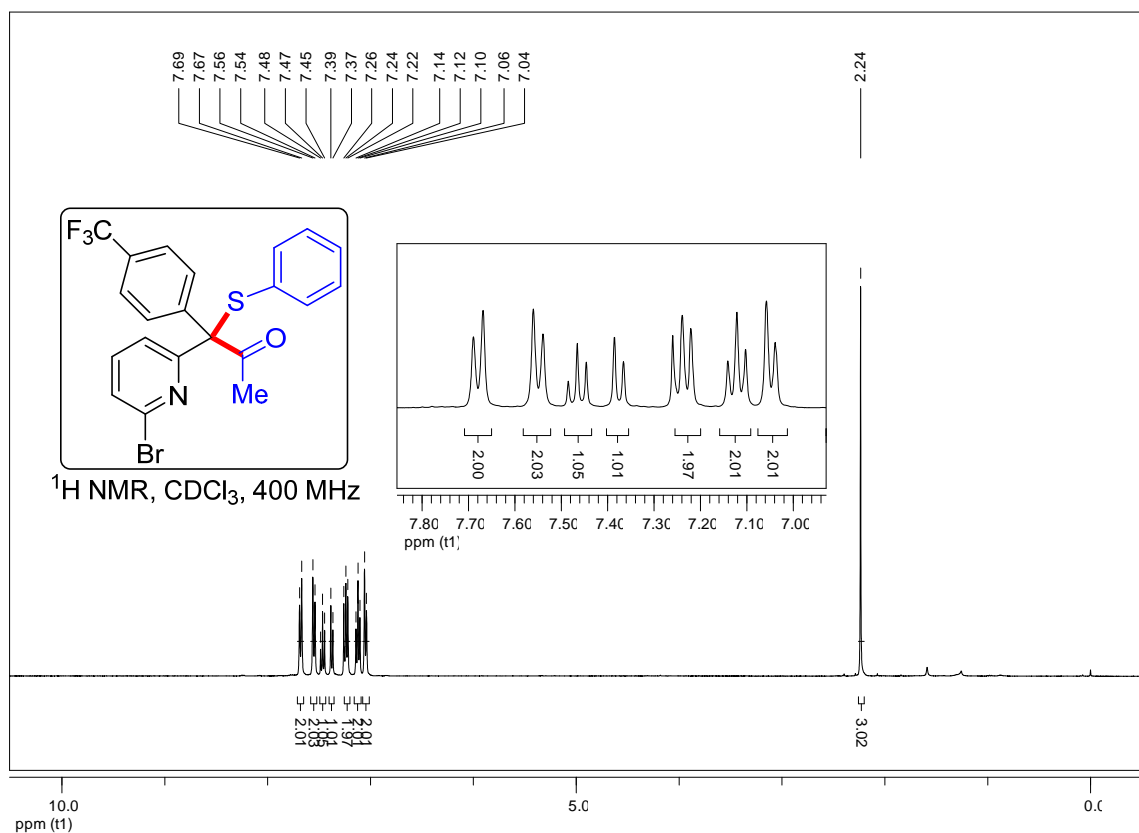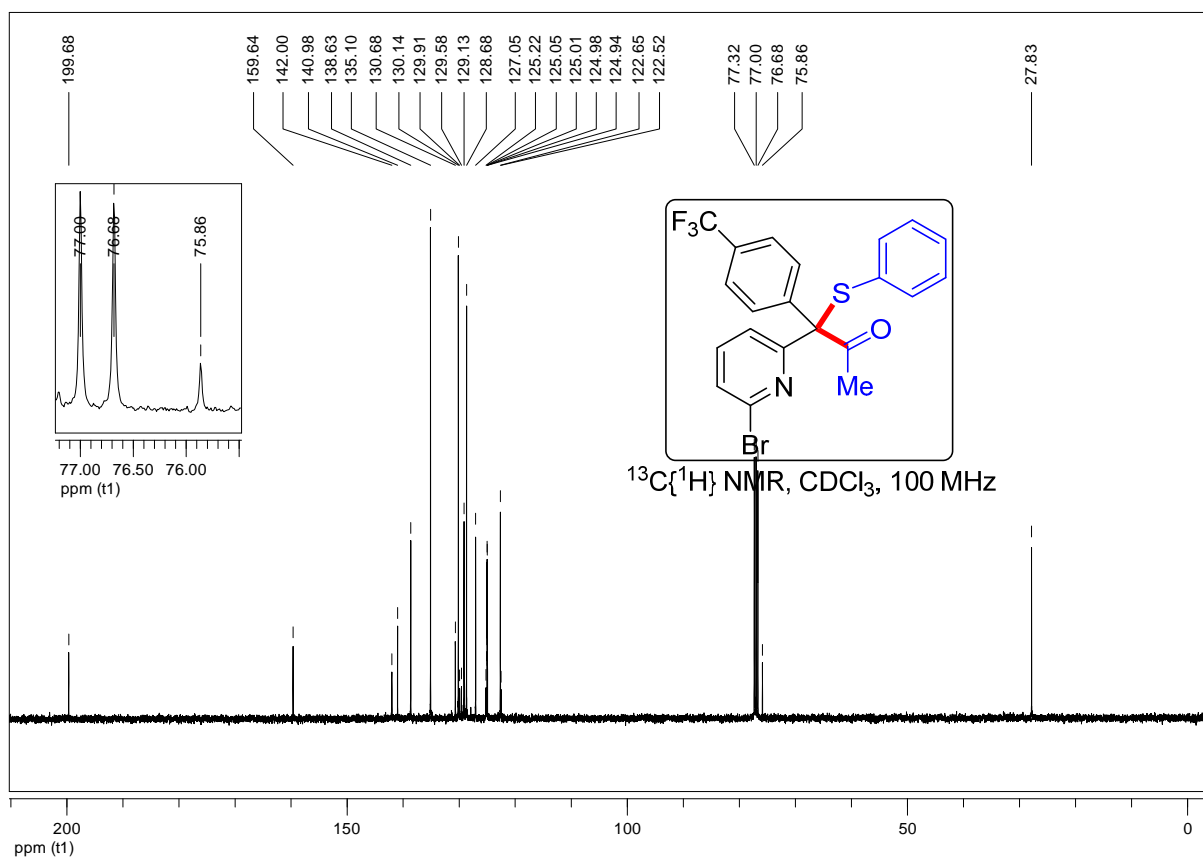

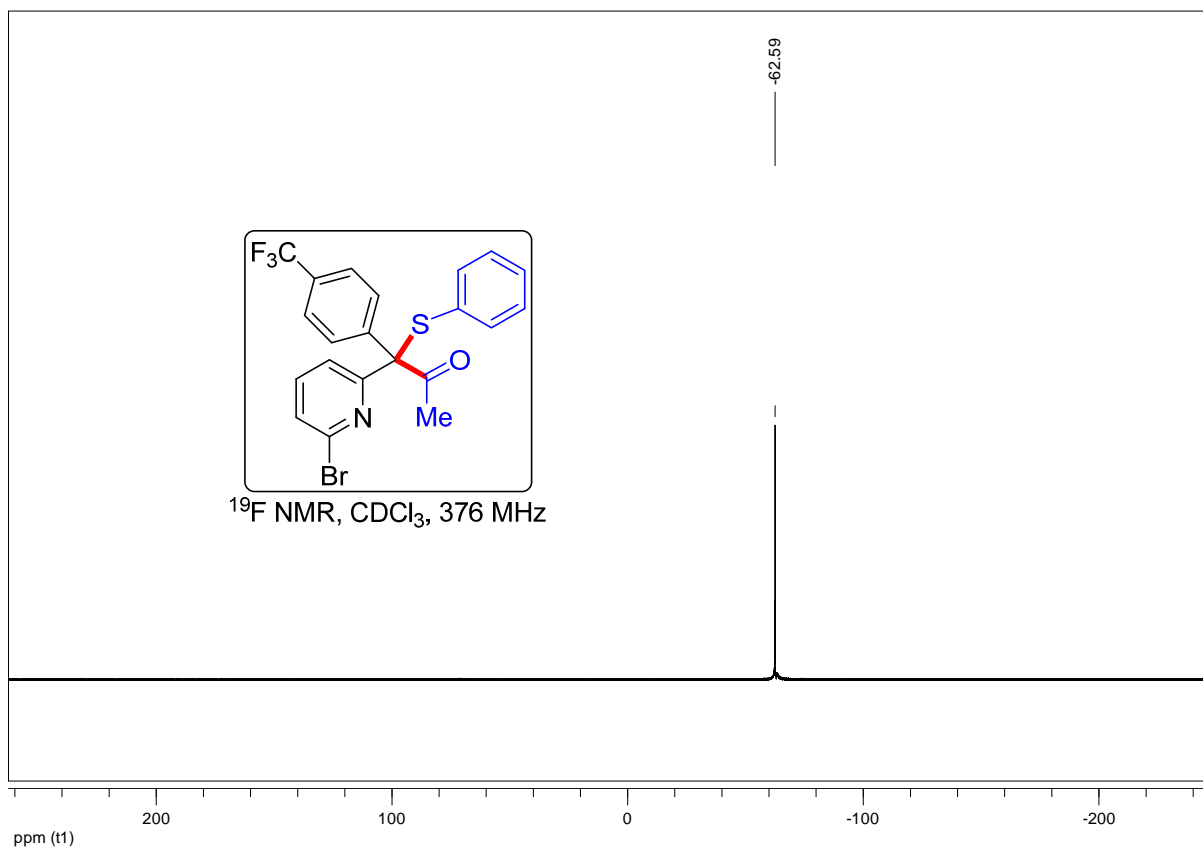



**1-(6-bromopyridin-2-yl)-1-((4-fluorophenyl)thio)-1-phenylpropan-2-one (3ga)**

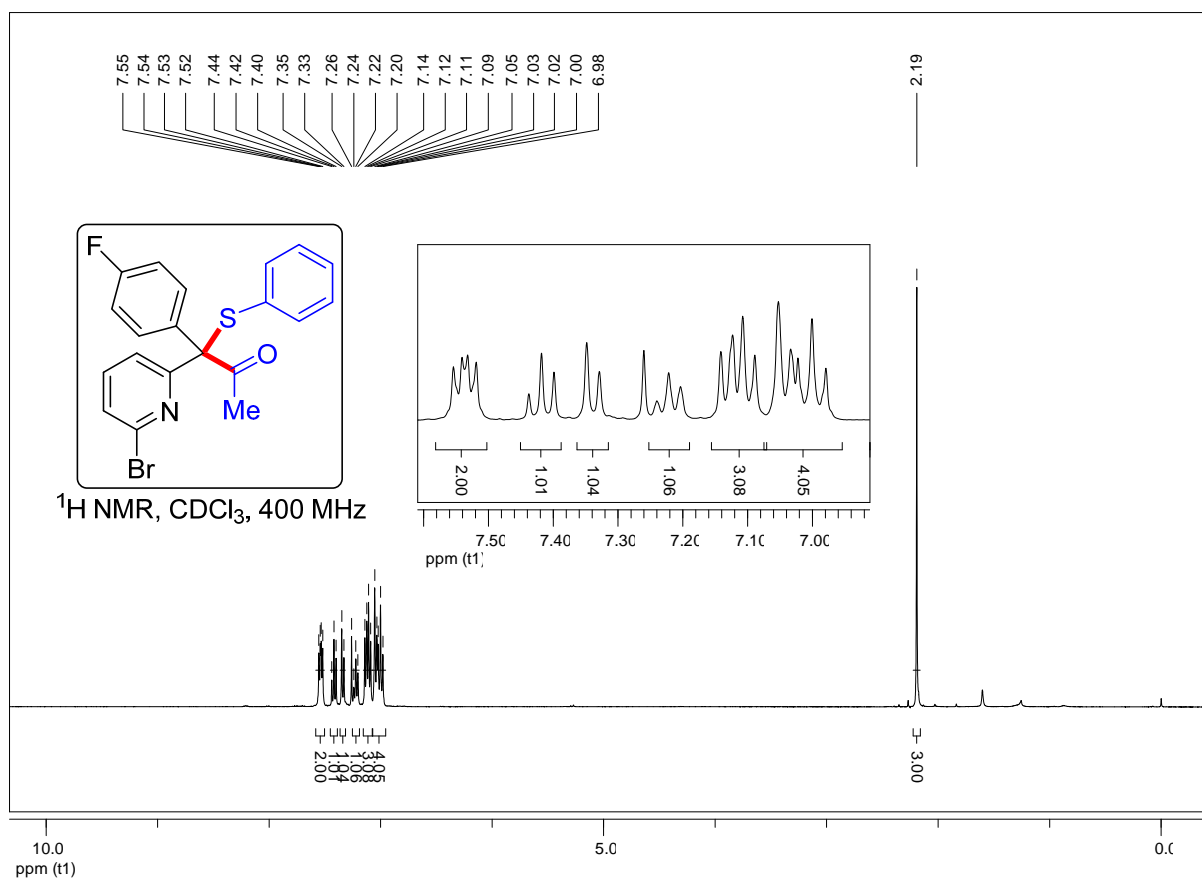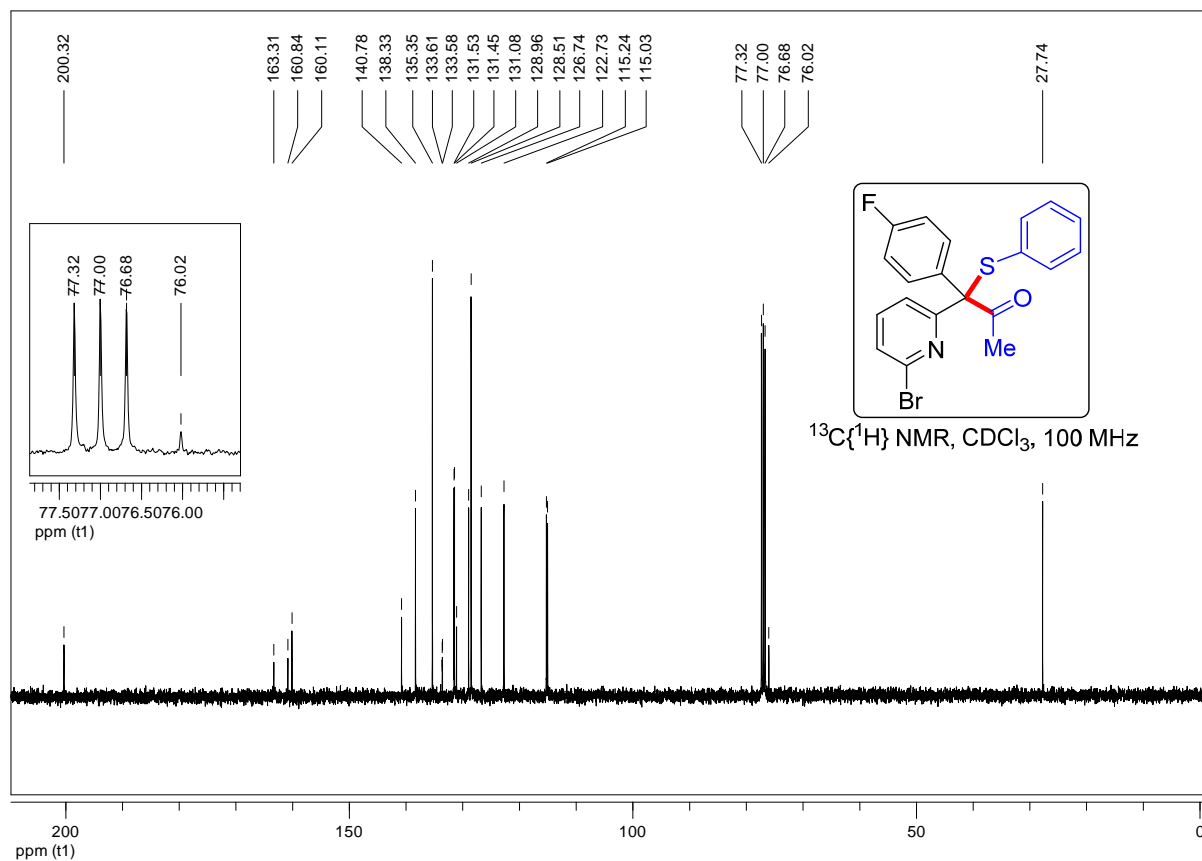

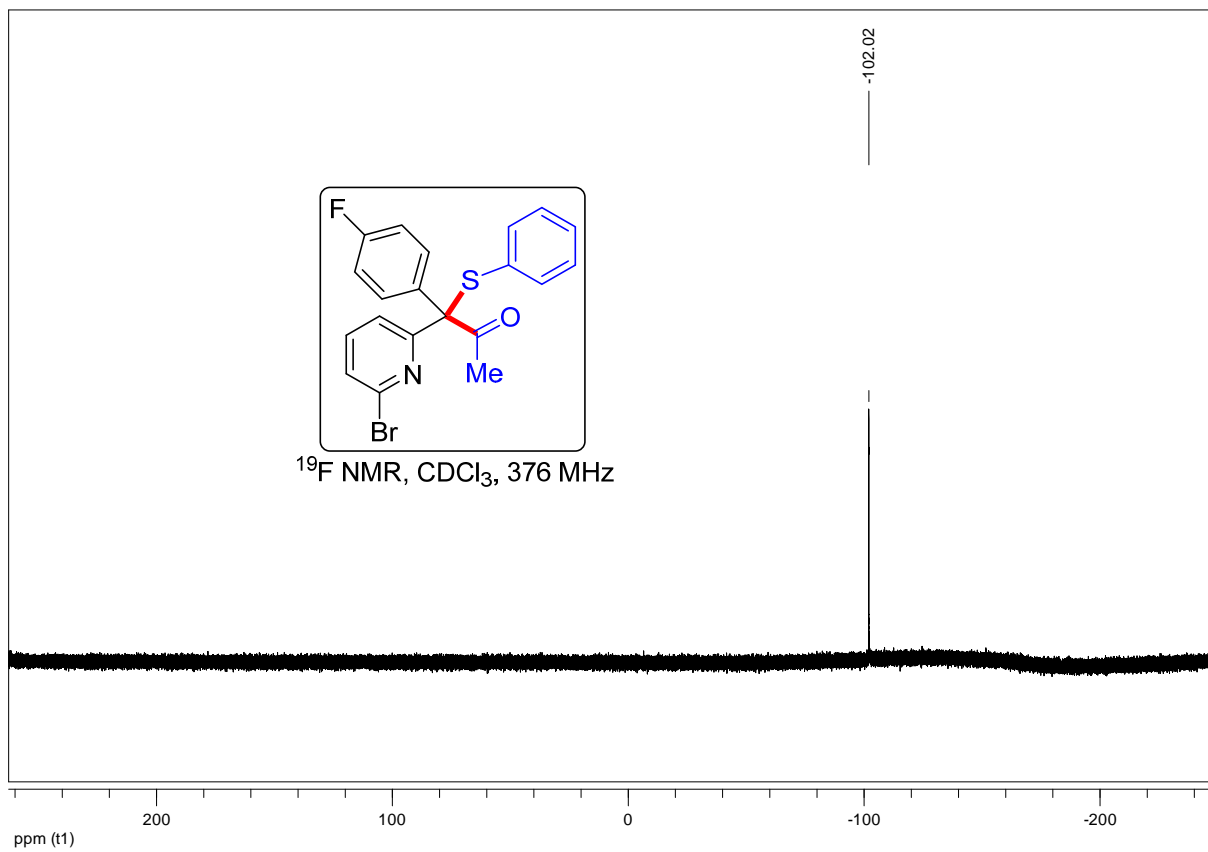

# 1-(6-bromopyridin-2-yl)-1-((4-chlorophenyl)thio)-1-phenylpropan-2-one (3ha)

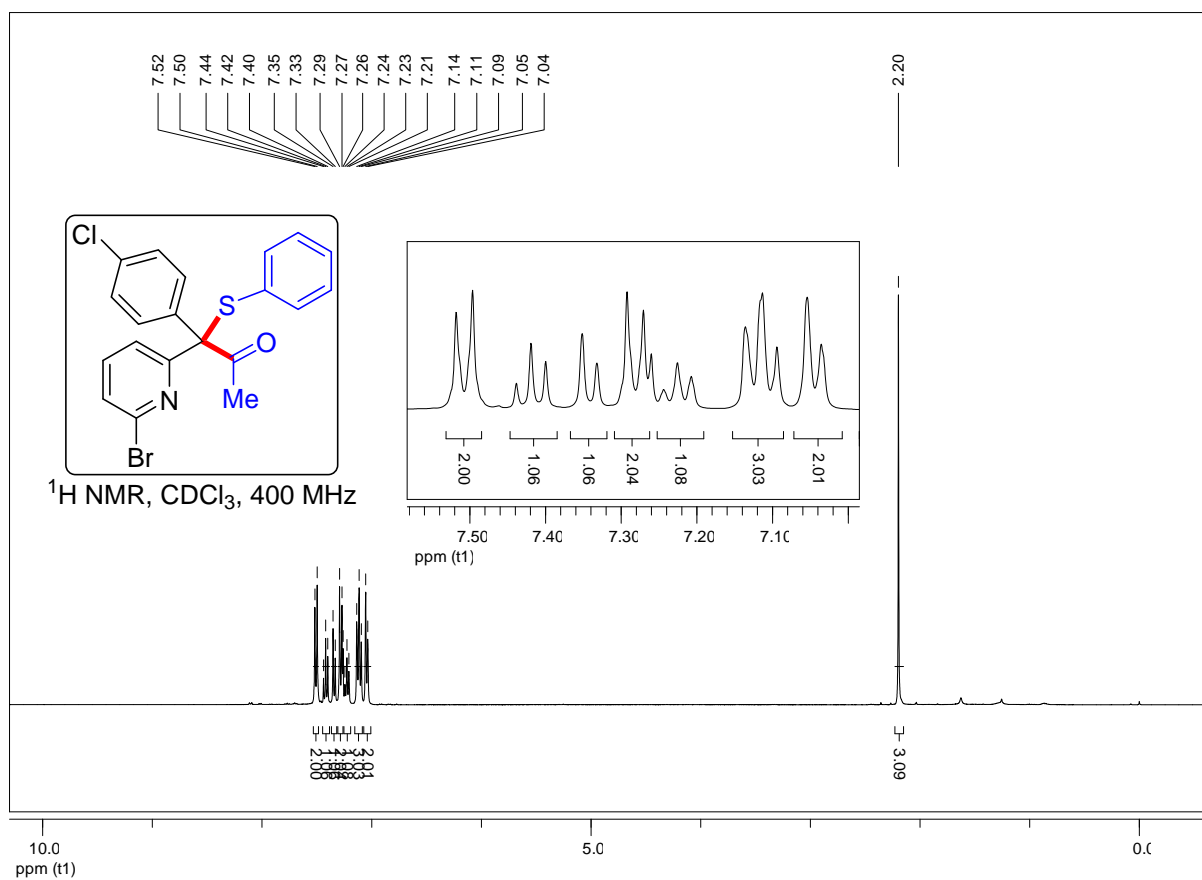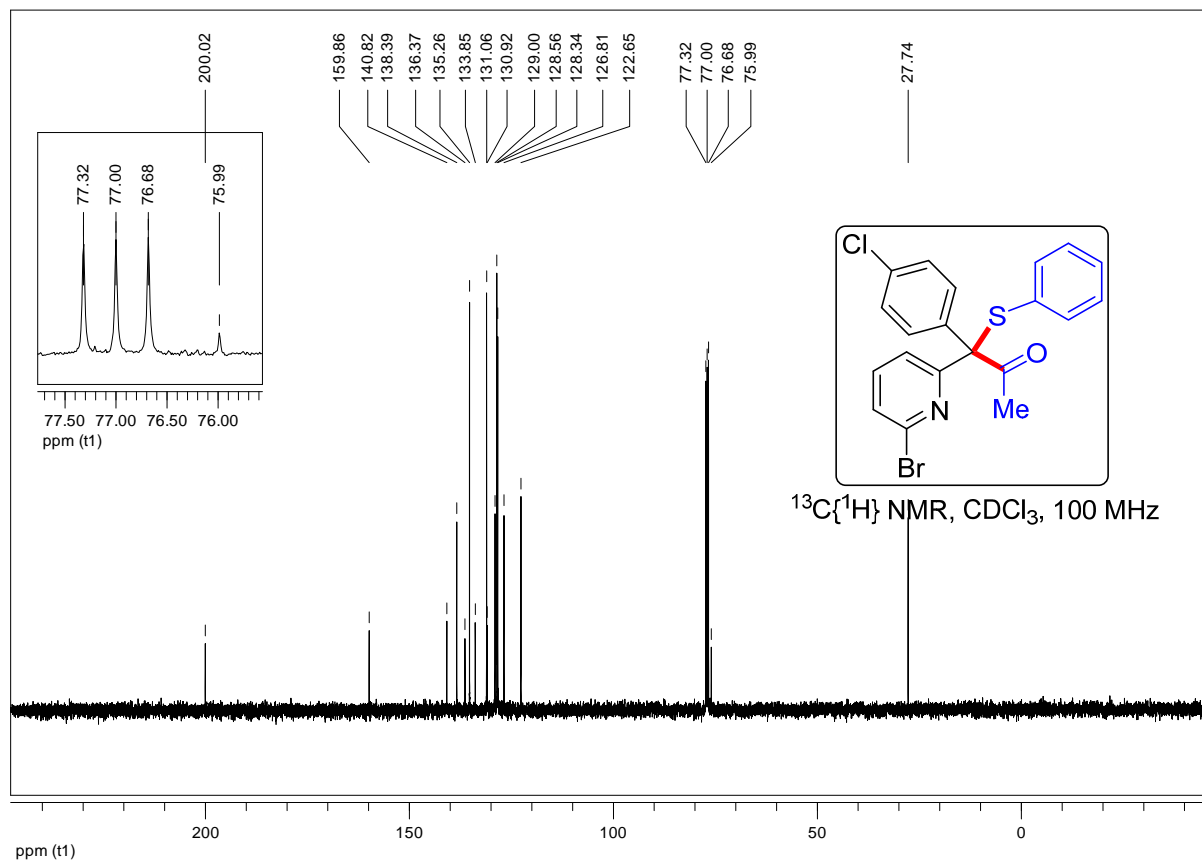

**(1R,2R,5S)-2-isopropyl-5-methylcyclohexyl-4-(1-(6-bromopyridin-2-yl)-2-oxo-1-(phenylthio)propyl)benzoate (3ia)**

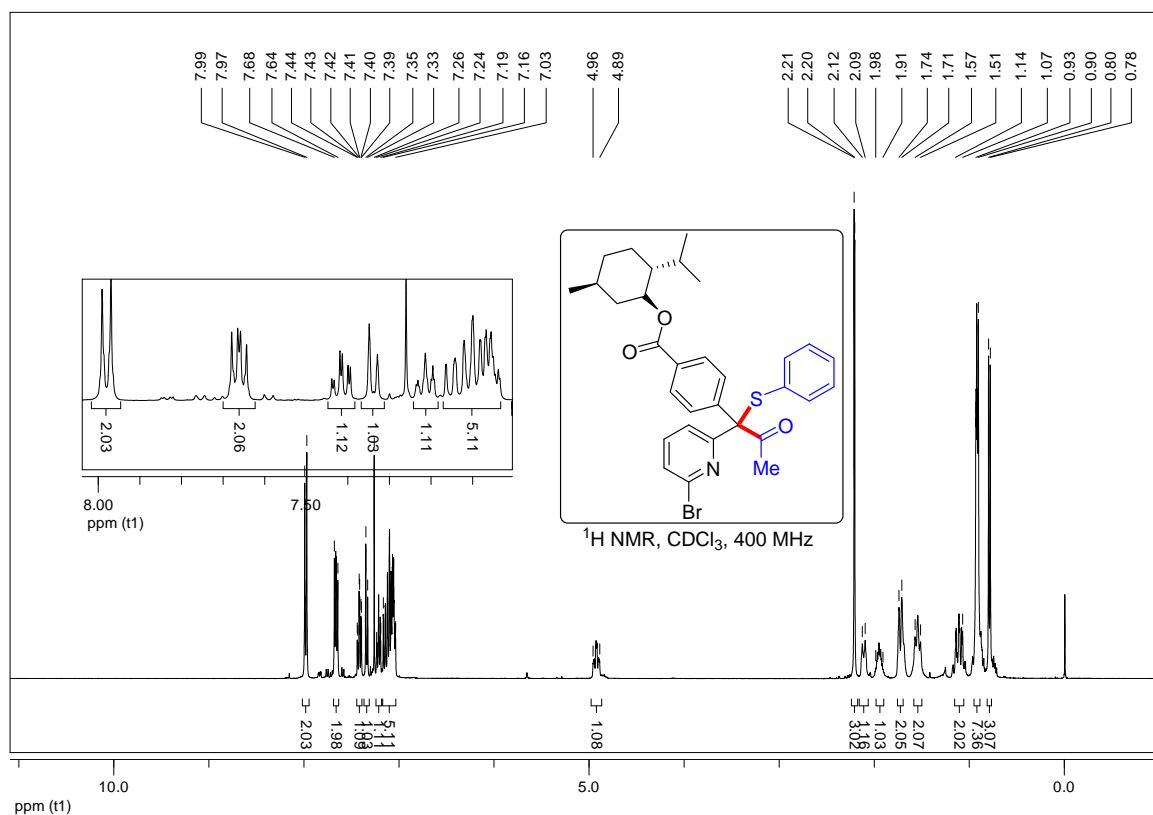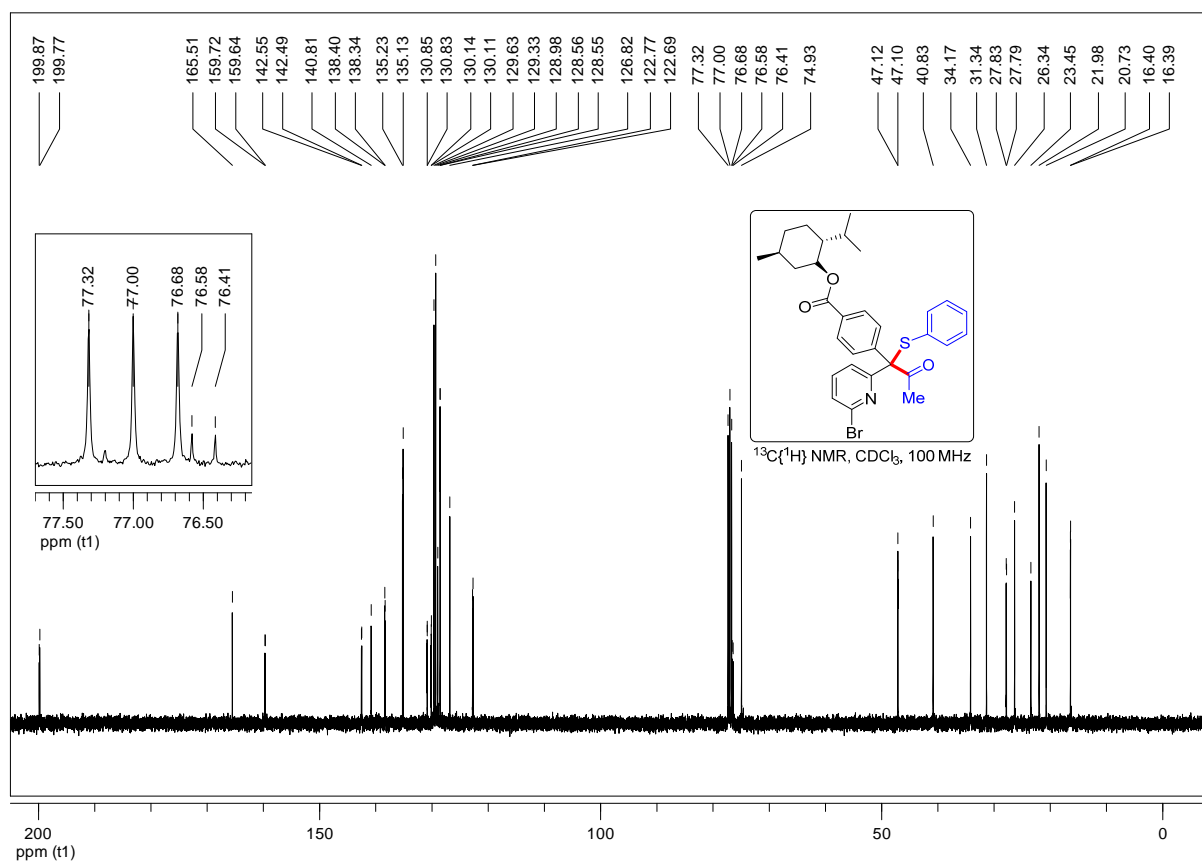

**1-(benzofuran-7-yl)-1-(6-bromopyridin-2-yl)-1-(phenylthio)propan-2-one (3ja)**

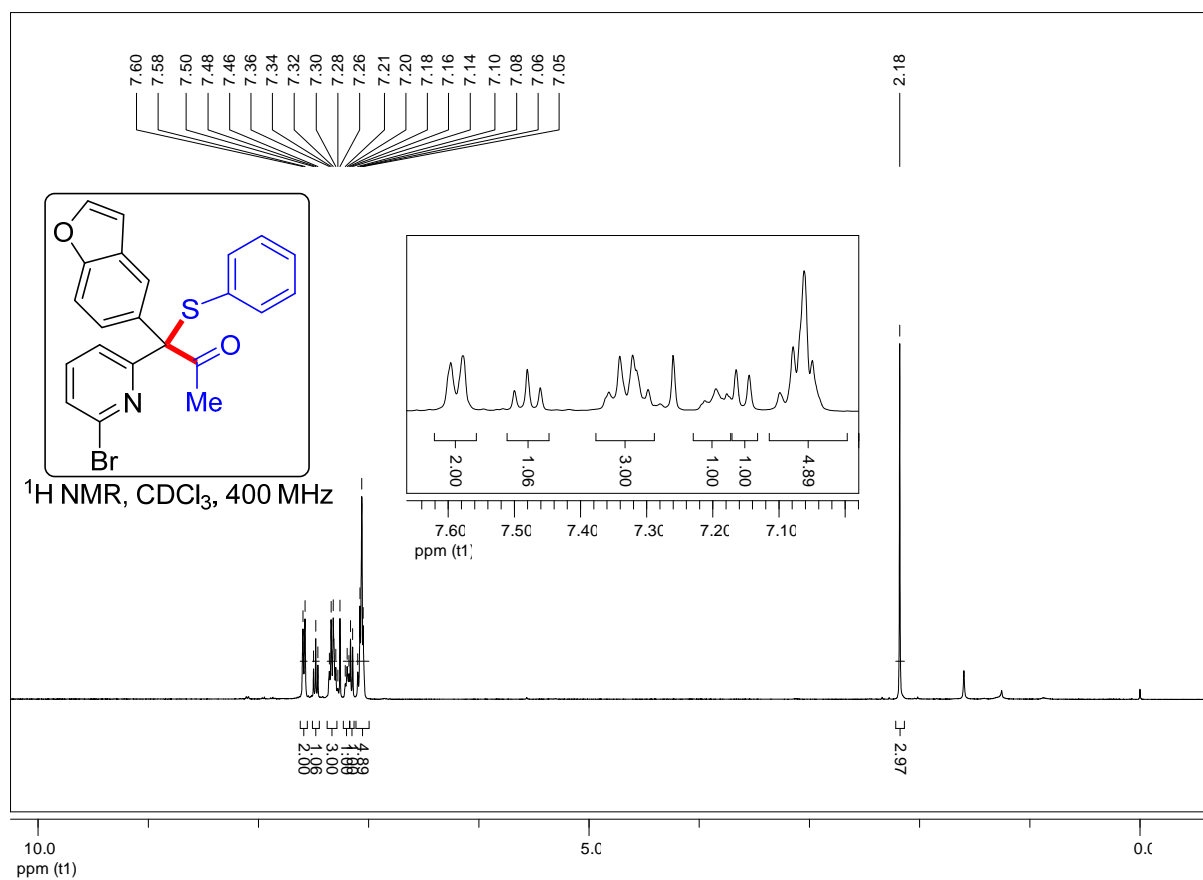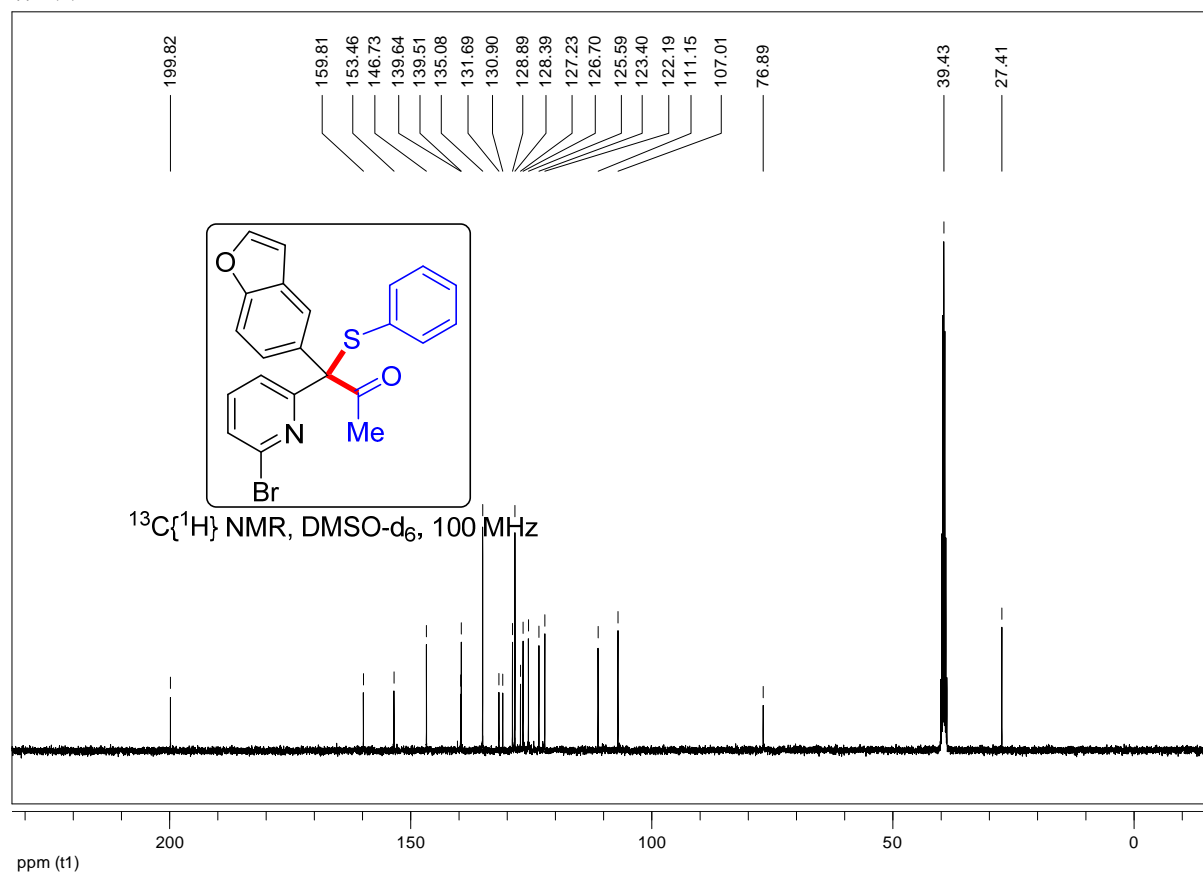

**1-(6-bromopyridin-2-yl)-1-((4-chlorophenyl)thio)-1-(thiophen-2-yl)propan-2-one (3ka)**

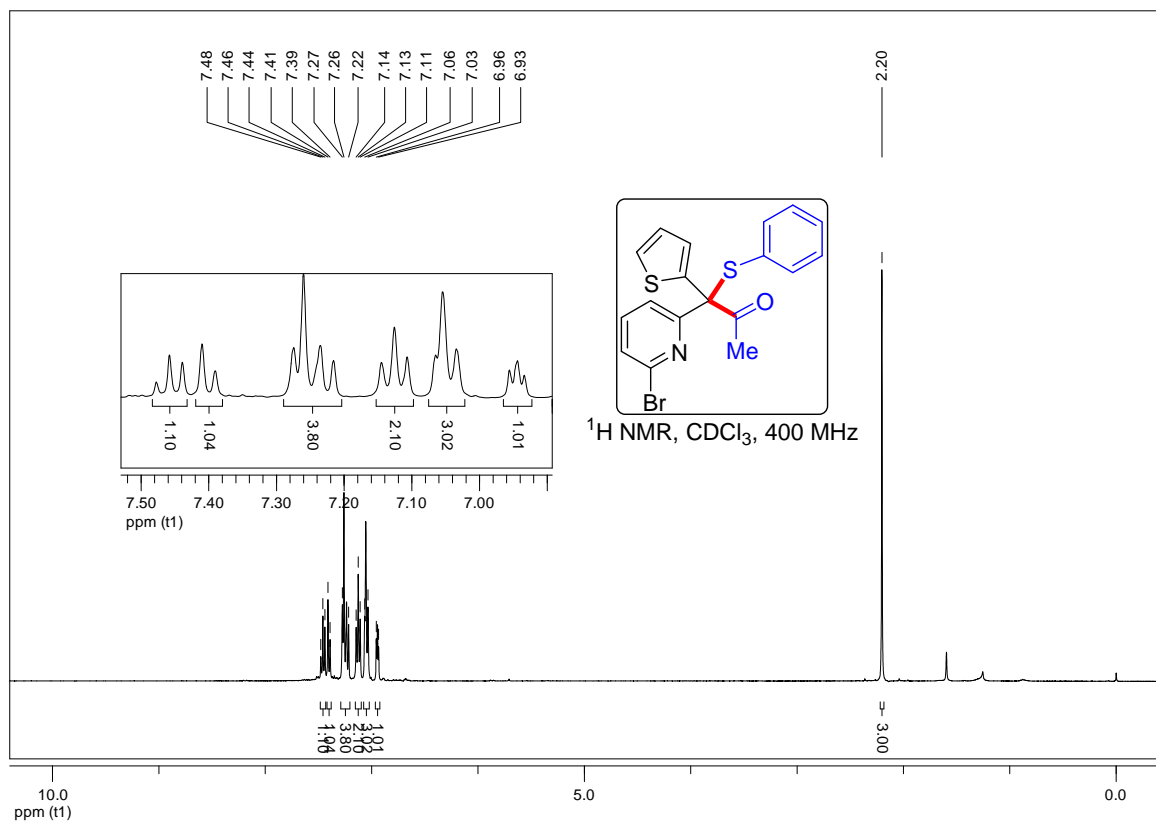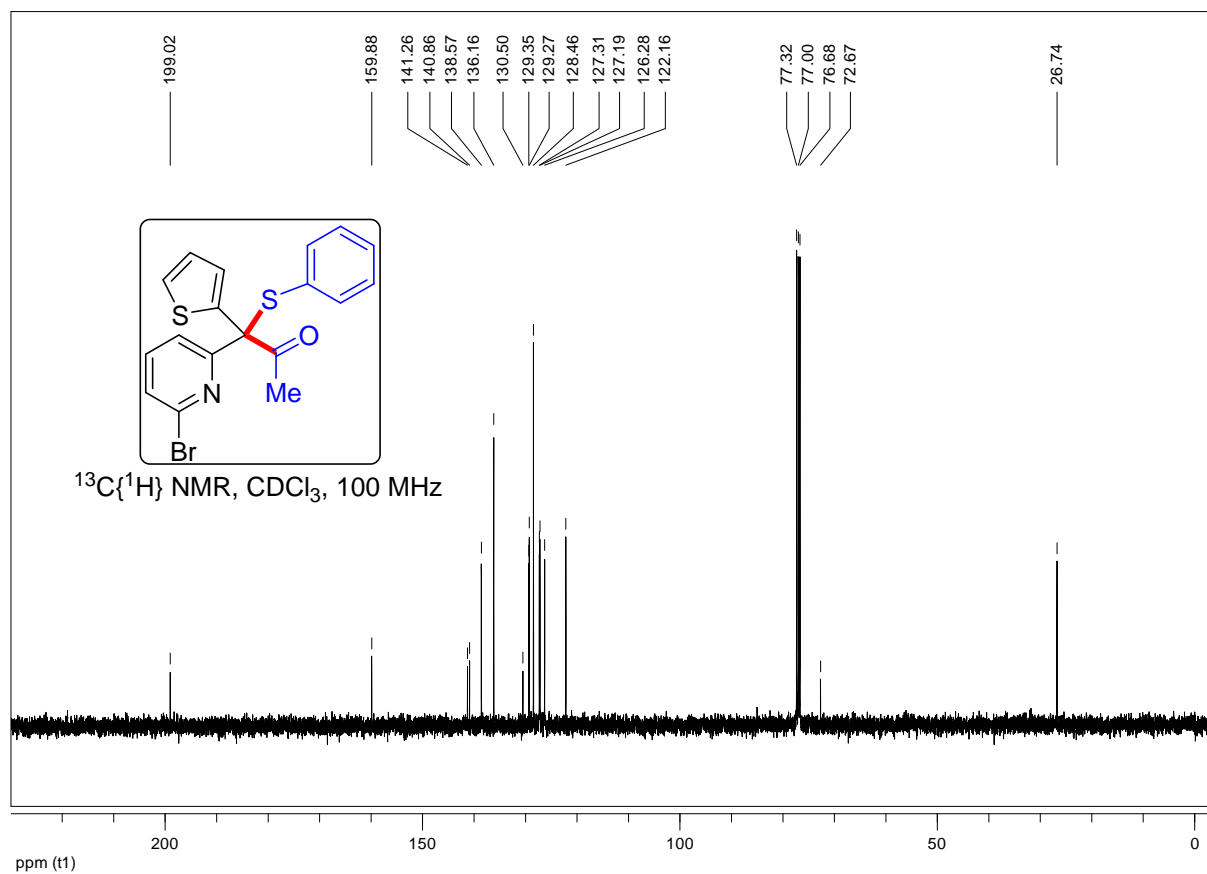

# 1-(6-chloropyridin-2-yl)-1-phenyl-1-(phenylthio)propan-2-one (3la)

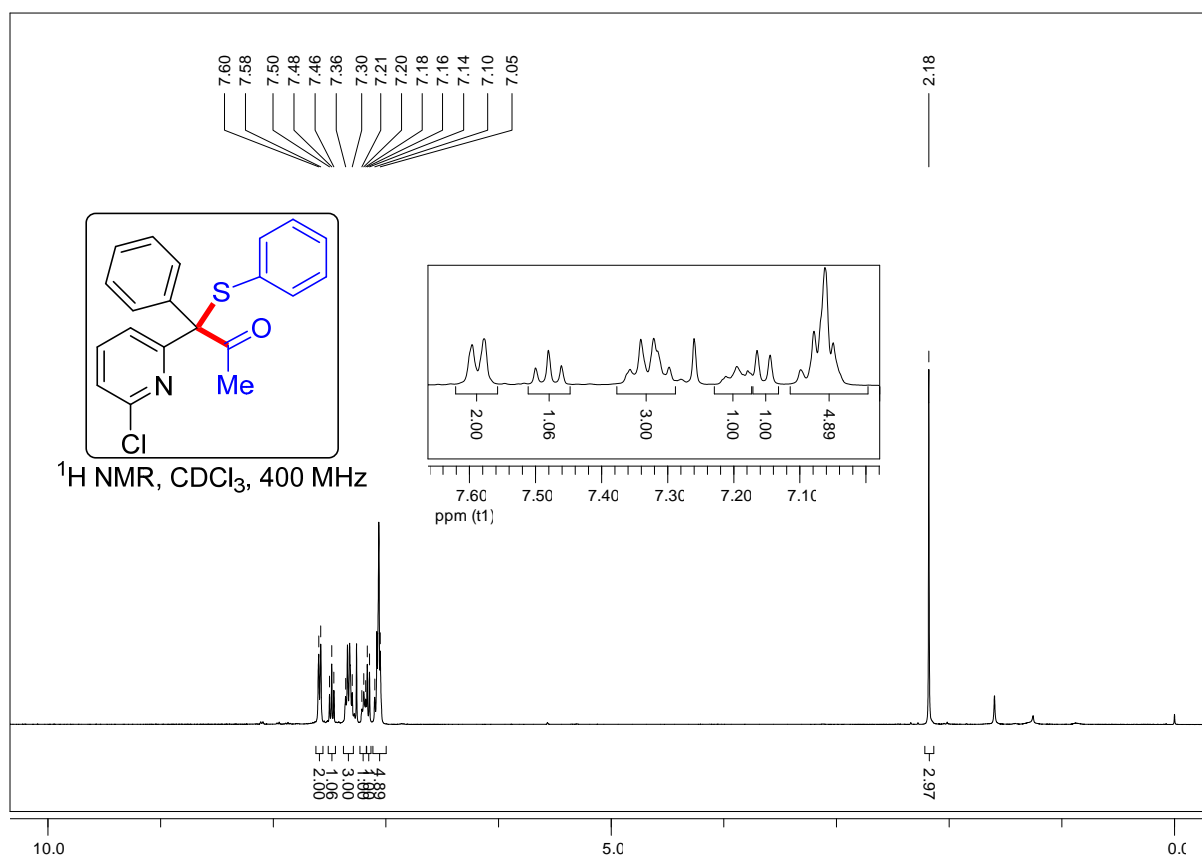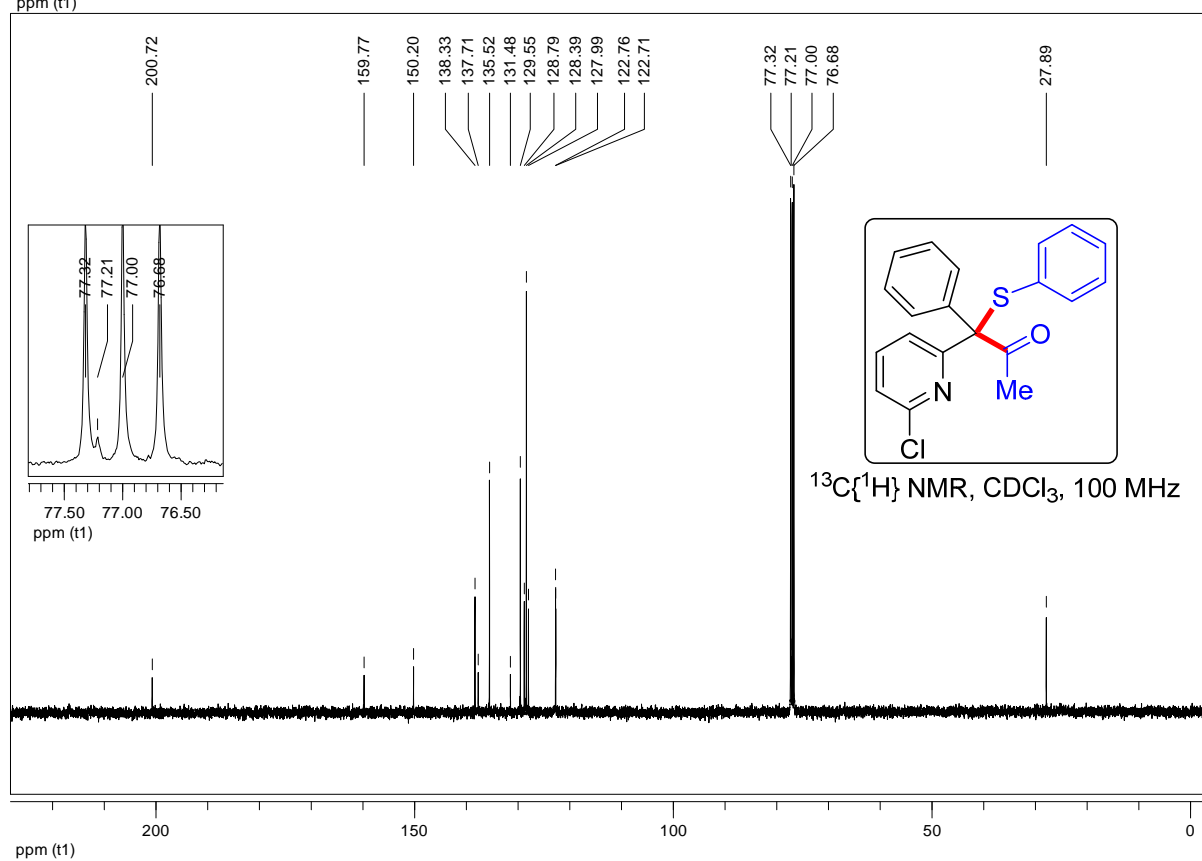

**1-(6-iodopyridin-2-yl)-1-phenyl-1-(phenylthio)propan-2-one (3ma)**

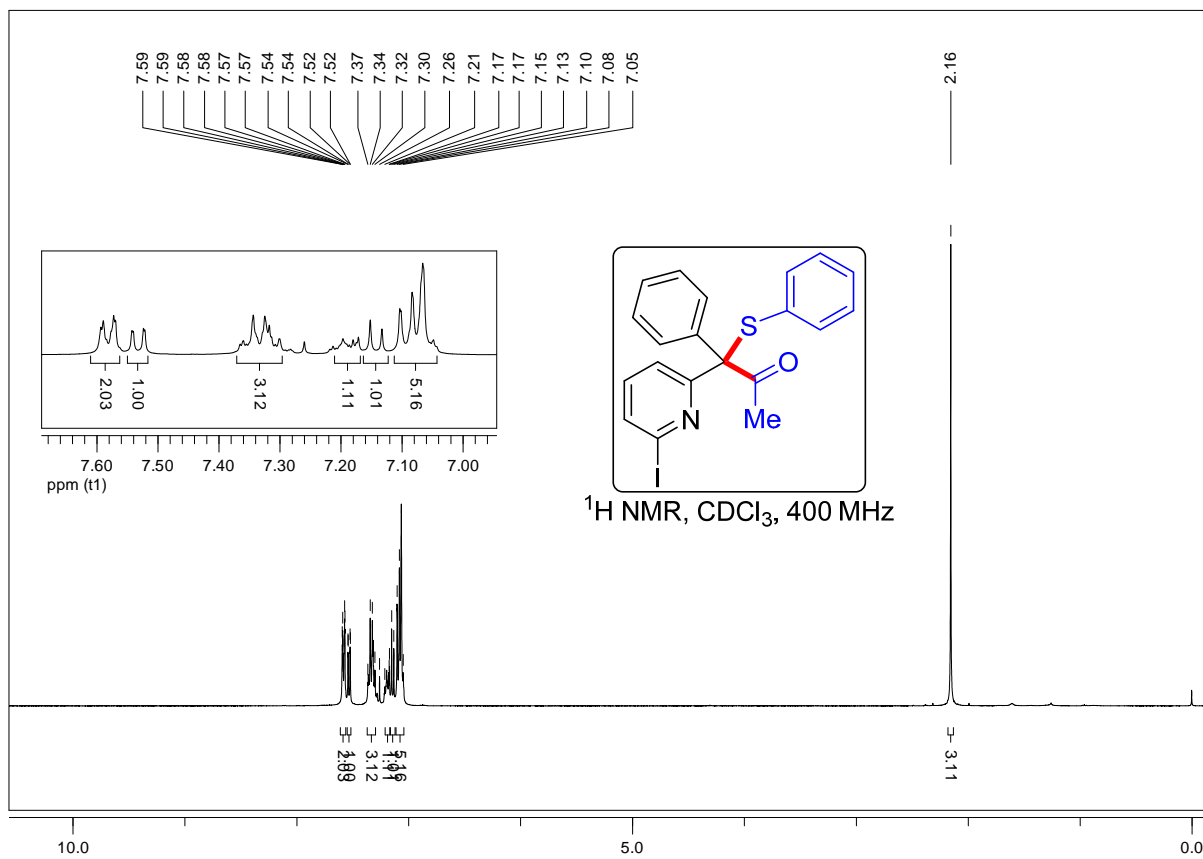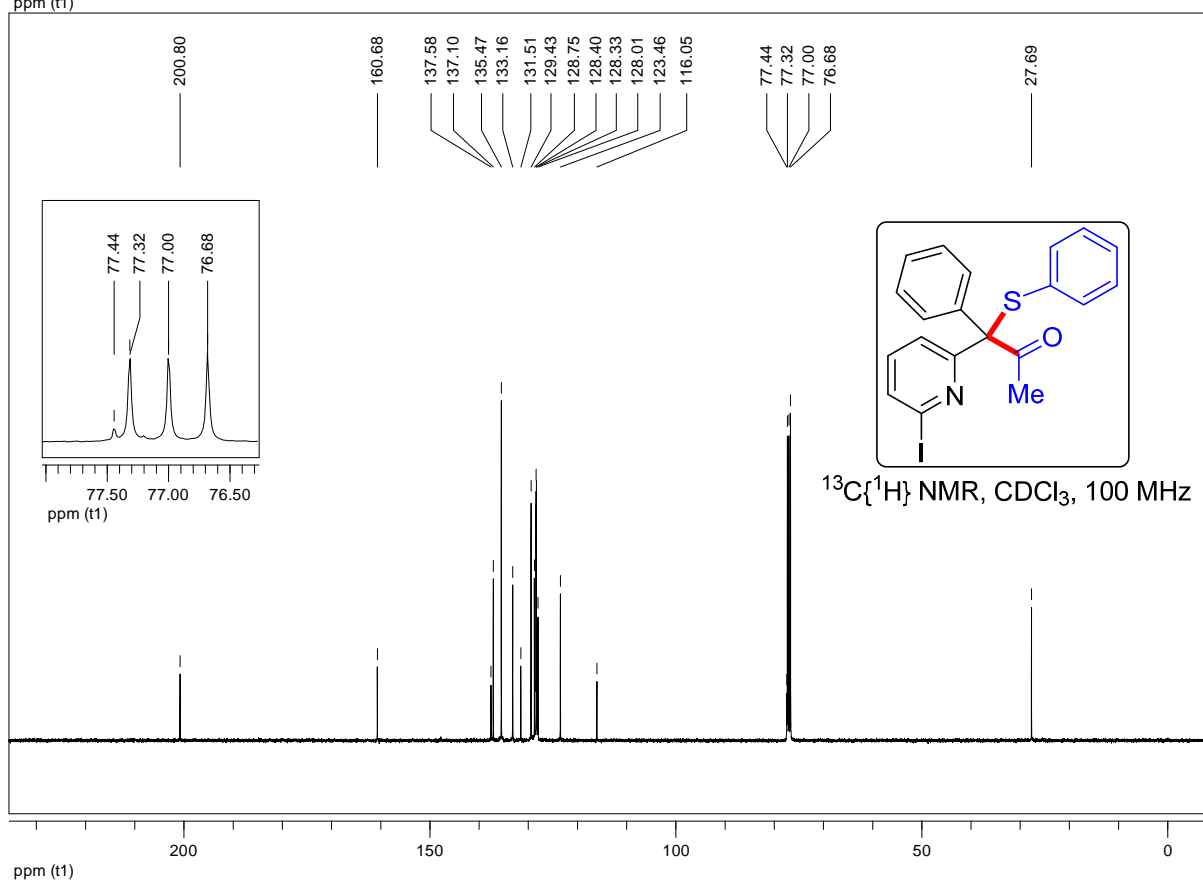



**methyl 6-(2-oxo-1-phenyl-1-(phenylthio)propyl)picolinate (3na)**

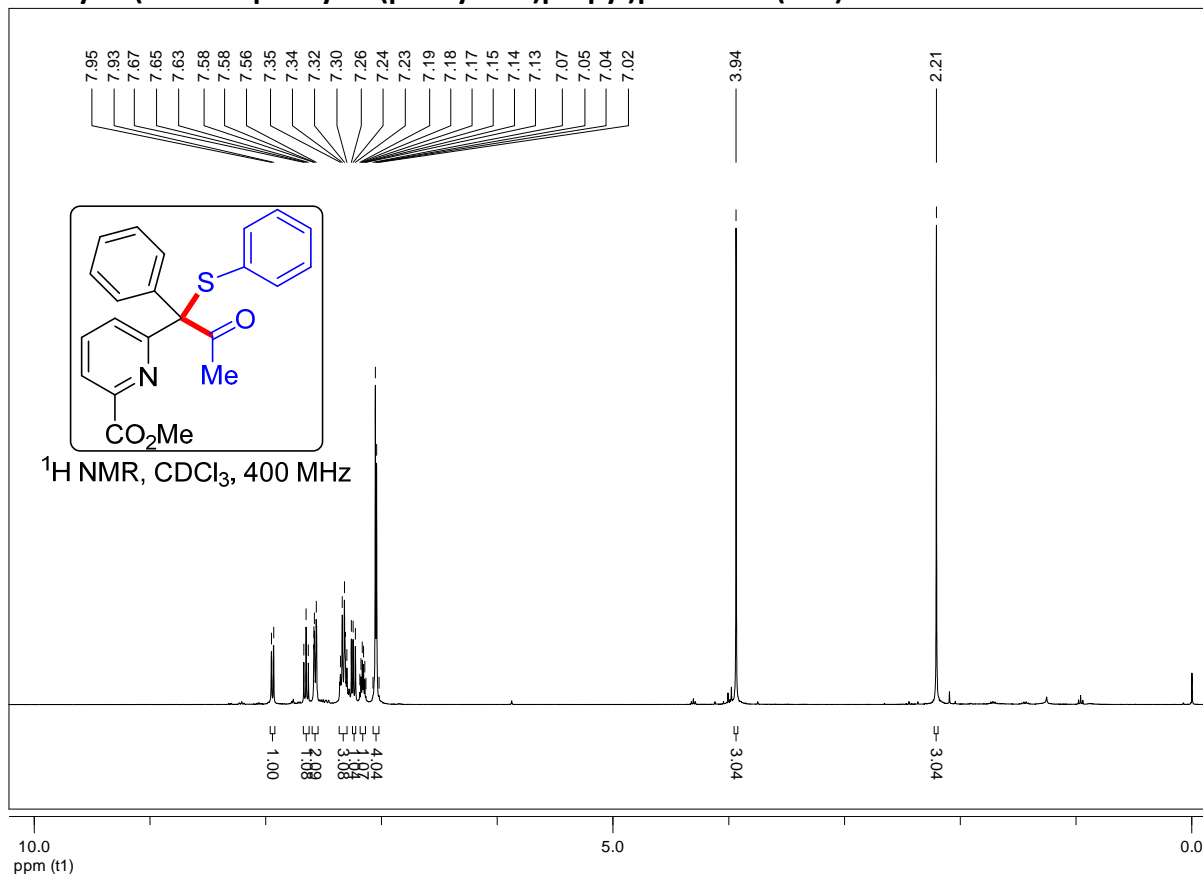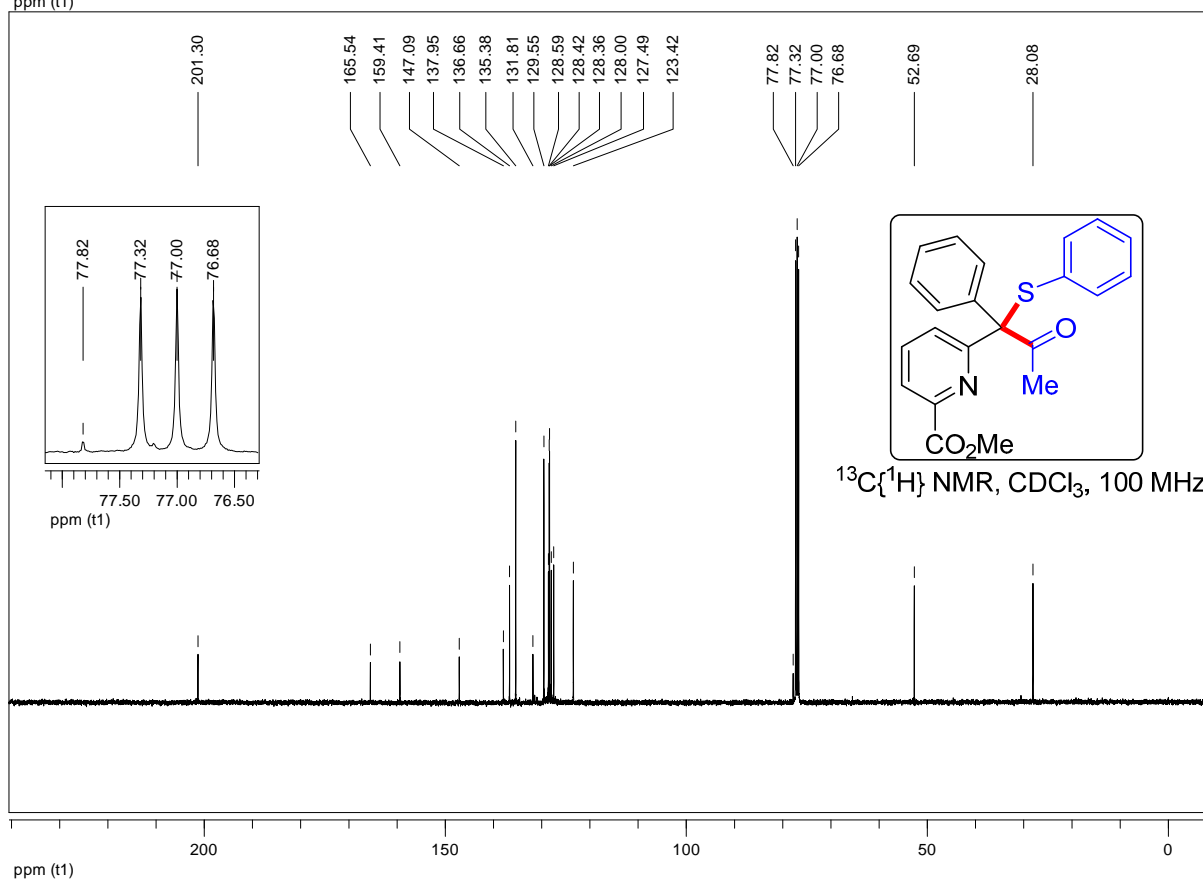

**1-(6-bromopyridin-2-yl)-1-phenyl-1-(phenylsulfonyl)propan-2-one (4)**

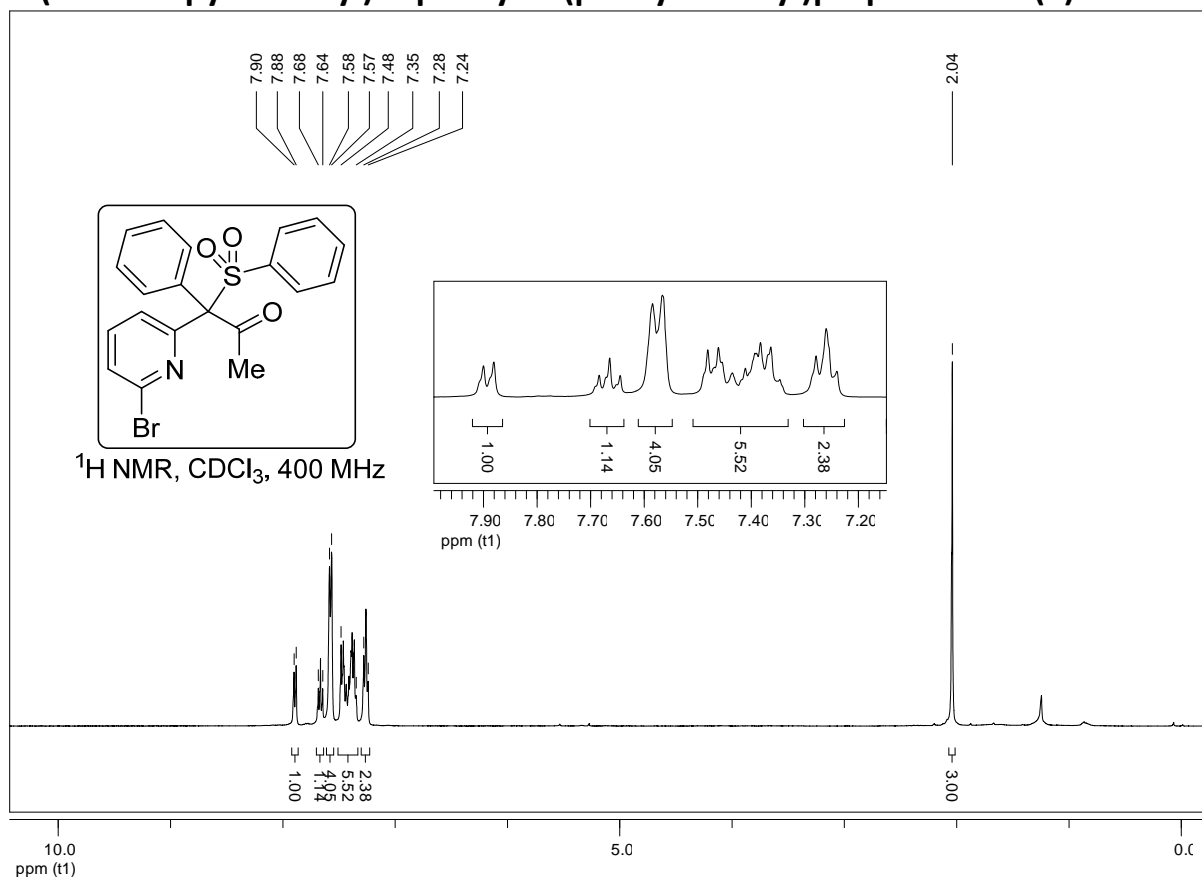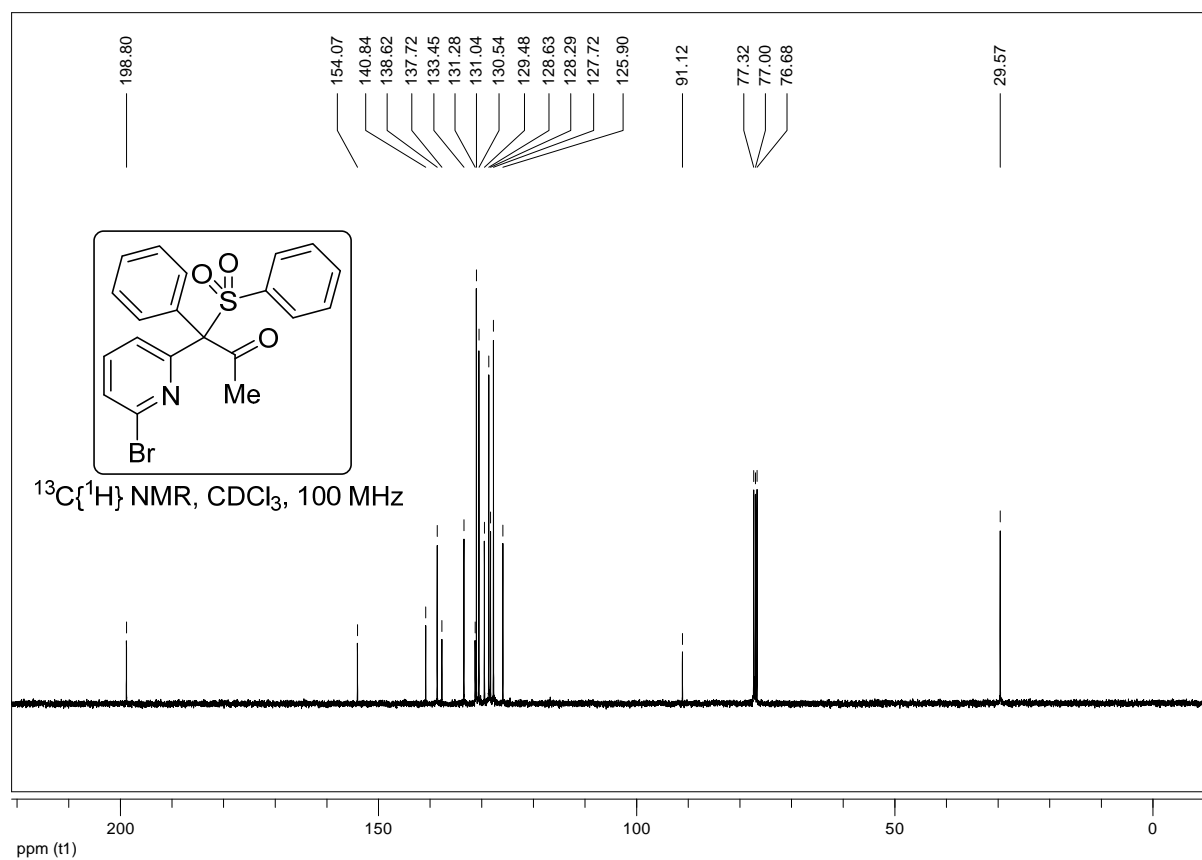

## References

- [1] (a) Chuprakov, S.; Hwang, F. W.; Gevorgyan, V. *Angew. Chem.Int. Ed.* **2007**, 46, 4757; (b) Shi, Y.; Okuda, A. V.; Gevorgyan, V. *Angew. Chem.Int. Ed.* **2014**, 53, 14191; (c) Hirayama, T.; Ueda, S.; Tsurue, N.; Okuda, K.; Nagasawa, H. *Chem.-Eur. J.* **2014**, 20, 4156.
- [2] (a) Krzysztof, K.; Grzegorz, H. *Org. Process Res. Dev.* **2018**, 22, 489; (b) Silvia, M.; Soria-Castro.; Alicia, B. P. *Beilstein J. Org. Chem.* **2013**, 9, 467; (c) Cheng, W. L.; Michal, S. *Chem. Commun.* **2018**, 54, 2130; (d) Mohammad, M.; Mojtahedi; Shamim, S.; *Journal of Chemistry.* **2013**, 2013, 1; (e) Thomas, S.; Steffen S.; Klaus, M. *Journal of Fluorine Chemistry.* **2013**, 154, 30; (f) Lin, Y. A.; Chalker, J. M.; Floyd, N. *Journal of the American Chemical Society*, **2008**, 130, 9642; (g) Chen, S.; Zhao, X.; Chen, J. *Bioconjugate Chemistry*, **2010**, 21, 979. (h) Sakai, N.; Horikawa, S.; Ogiwara, Y. *Synthesis*, **2018**, 50, 565; (i) Mohammad, A.; Reza, K. *Beilstein J. Org. Chem.* **2015**, 11, 1265.
- [3] Sheldrick, G. M. A short history of SHELX. *Acta Crystallogr.* **2008**, A64, 112.
